# Supplementary material for: Improved redox homeostasis owing to the up-regulation of one-carbon metabolism and related pathways is crucial for yeast heterosis at high temperature
Source: HighWire-hosted journal article supplement (doi:10.1101/gr.262055.120), 2021-03-15
Supplement: Supplemental_Table_S1.xlsx [file Supplemental_Table_S1.xlsx]

## Sheet: Sheet1
Table S1. Growth profiles of F1 hybrids and their wild parental strains and parental genetic divergences (MPV, mid-parent value; BP, better parent)
Strain			Parental genetic divergence (10-3)	Maximum Growth Rate (MGR) at 40°C (OD/min)					Growth Efficiency (GE) at 40°C (OD)					Maximum Growth Rate (MGR) at 30°C (OD/min)					Growth Efficiency (GE) at 30°C (OD)
F1 hybrid	Parent 1	Parent 2		F1 hybrid	Parent 1	Parent 2	F1 - MPV	F1 - BP	F1 hybrid	Parent 1	Parent 2	F1 - MPV	F1 - BP	F1 hybrid	Parent 1	Parent 2	F1 - MPV	F1 - BP	F1 hybrid	Parent 1	Parent 2	F1 - MPV	F1 - BP
Hy1	BJ24	HN9	7.466	0.0071994	0.00693016	0.00466007	0.00140429	0.000269245	1.10043	0.713325	0.0767113	0.705413	0.387106	0.00843467	0.00653461	0.00663048	0.00185213	0.00180419	3.83043	4.68251	3.87279	-0.447221	-0.852082
Hy2	HN9	FJ2	7.178	0.00788944	0.00466007	0.00644952	0.00233464	0.00143991	1.70008	0.0767113	0.225265	1.5491	1.47482	0.00834464	0.00663048	0.00785149	0.00110366	0.000493154	3.97044	3.87279	4.02574	0.0211714	-0.0553002
Hy3	BJ24	FJ2	6.348	0.00929901	0.00693016	0.00644952	0.00260917	0.00236885	1.98105	0.713325	0.225265	1.51176	1.26773	0.00837079	0.00653461	0.00785149	0.00117774	0.000519307	3.83611	4.68251	4.02574	-0.518012	-0.846401
Hy5	FJ2	SD1	5.324	0.00957827	0.00644952	0.00433851	0.00418425	0.00312874	1.05812	0.225265	0.201537	0.844716	0.832851	0.00683006	0.00785149	0.00981844	-0.0020049	-0.00298837	3.85446	4.02574	4.32957	-0.323194	-0.47511
Hy6	BJ6	FJ3	6.31	0.0082376	0.00575254	0.000933786	0.00489444	0.00248506	1.61107	0.440685	0.0138821	1.38379	1.17039	0.00831086	0.00701466	0.00760317	0.00100194	0.000707682	3.956	4.53159	4.72637	-0.672987	-0.770379
Hy7	BJ6	HN18	6.277	0.00863076	0.00575254	0.00790443	0.00180227	0.000726327	1.62143	0.440685	1.56903	0.61657	0.0523967	0.00794431	0.00701466	0.00755358	0.000660186	0.000390729	4.07122	4.53159	4.53018	-0.459664	-0.460368
Hy8	BJ6	HLJ1	2.74	0.00926914	0.00575254	0.00841803	0.00218385	0.000851107	1.41397	0.440685	2.02802	0.179619	-0.614048	0.00793979	0.00701466	0.0085429	0.000161007	-0.00060311	3.74382	4.53159	4.04684	-0.545396	-0.787771
Hy10	BJ6	FJ11	6.137	0.00888532	0.00575254	0.00880753	0.00160528	7.7789e-05	1.87328	0.440685	2.46391	0.420988	-0.590623	0.00804939	0.00701466	0.00871982	0.00018215	-0.000670426	3.89566	4.53159	4.22645	-0.48336	-0.635929
Hy11	BJ6	GT99.1	6.281	0.00890749	0.00575254	0.00839766	0.00183239	0.000509825	2.04058	0.440685	1.60042	1.02002	0.440156	0.00857424	0.00701466	0.00849483	0.000819494	7.9411e-05	3.7849	4.53159	4.89613	-0.928956	-1.11122
Hy12	FJ3	HN18	1.752	0.00800979	0.000933786	0.00790443	0.00359068	0.000105351	0.790622	0.0138821	1.56903	-0.000834453	-0.778409	0.00745258	0.00760317	0.00755358	-0.000125799	-0.000150597	3.98327	4.72637	4.53018	-0.64501	-0.743105
Hy13	BJ14	FJ3	6.401	0.00945789	0.00830923	0.000933786	0.00483638	0.00114865	2.2158	1.21965	0.0138821	1.59903	0.996149	0.00770595	0.00847383	0.00760317	-0.000332555	-0.000767884	3.60917	4.18066	4.72637	-0.844351	-1.11721
Hy14	FJ11	FJ3	5.537	0.00922877	0.00880753	0.000933786	0.00435812	0.000421244	2.50603	2.46391	0.0138821	1.26713	0.0421188	0.00773071	0.00871982	0.00760317	-0.000430784	-0.000989105	4.39359	4.22645	4.72637	-0.0828211	-0.332781
Hy15	GT99.1	FJ3	5.694	0.00918005	0.00839766	0.000933786	0.00451433	0.00078239	2.50447	1.60042	0.0138821	1.69732	0.904047	0.00866391	0.00849483	0.00760317	0.000614908	0.000169079	4.66426	4.89613	4.72637	-0.146992	-0.231869
Hy16	HLJ1	FJ3	6.416	0.00893008	0.00841803	0.000933786	0.00425417	0.000512043	1.74444	2.02802	0.0138821	0.723495	-0.283573	0.00748077	0.0085429	0.00760317	-0.000592266	-0.00106213	4.03093	4.04684	4.72637	-0.355674	-0.69544
Hy17	BJ14	HLJ1	2.907	0.00908585	0.00830923	0.00841803	0.000722219	0.000667819	1.50554	1.21965	2.02802	-0.118289	-0.522473	0.00647837	0.00847383	0.0085429	-0.00203	-0.00206453	4.25185	4.18066	4.04684	0.138102	0.0711907
Hy18	HLJ1	HN18	6.43	0.00921811	0.00841803	0.00790443	0.00105687	0.000800074	1.94776	2.02802	1.56903	0.149237	-0.0802559	0.00708153	0.0085429	0.00755358	-0.000966712	-0.00146137	4.34193	4.04684	4.53018	0.0534214	-0.18825
Hy19	BJ14	HN18	6.392	0.0089138	0.00830923	0.00790443	0.00080697	0.000604571	1.96793	1.21965	1.56903	0.573594	0.398903	0.00778081	0.00847383	0.00755358	-0.000232898	-0.000693025	3.75361	4.18066	4.53018	-0.601813	-0.776573
Hy20	BJ14	FJ11	6.216	0.00916323	0.00830923	0.00880753	0.000604845	0.000355696	2.48177	1.21965	2.46391	0.639987	0.0178576	0.00828139	0.00847383	0.00871982	-0.000315436	-0.000438428	4.45446	4.18066	4.22645	0.250902	0.228007
Hy21	FJ11	HN18	5.544	0.00976223	0.00880753	0.00790443	0.00140625	0.000954699	1.81042	2.46391	1.56903	-0.206046	-0.653485	0.00891056	0.00871982	0.00755358	0.00077386	0.000190741	4.41362	4.22645	4.53018	0.0352965	-0.116569
Hy22	FJ11	FJSA40.2	2.013	0.00929709	0.00880753	0.00649643	0.00164511	0.00048956	2.02574	2.46391	0.667815	0.459875	-0.438171	0.00809755	0.00871982	0.00754025	-3.2484e-05	-0.000622265	4.12942	4.22645	4.45764	-0.212628	-0.328219
Hy23	HLJ1	FJ11	6.254	0.00942644	0.00841803	0.00880753	0.000813654	0.000618904	2.24444	2.02802	2.46391	-0.00152334	-0.219469	0.00862685	0.0085429	0.00871982	-4.507e-06	-9.2965e-05	3.65691	4.04684	4.22645	-0.479734	-0.56954
Hy24	GT99.1	HN18	5.711	0.00892696	0.00839766	0.00790443	0.000775914	0.0005293	2.80901	1.60042	1.56903	1.22429	1.20859	0.00827266	0.00849483	0.00755358	0.000248453	-0.000222174	4.21857	4.89613	4.53018	-0.494582	-0.677554
Hy25	HLJ1	GT99.1	6.377	0.00910737	0.00841803	0.00839766	0.000699525	0.00068934	2.47896	2.02802	1.60042	0.664738	0.45094	0.00821764	0.0085429	0.00849483	-0.000301228	-0.000325262	4.45857	4.04684	4.89613	-0.012911	-0.437554
Hy26	BJ14	GT99.1	6.314	0.00934998	0.00830923	0.00839766	0.000996528	0.000952313	2.36875	1.21965	1.60042	0.958716	0.76833	0.00818178	0.00847383	0.00849483	-0.000302553	-0.000313053	4.56883	4.18066	4.89613	0.0304363	-0.327296
Hy28	FJ11	GT99.1	1.275	0.0090343	0.00880753	0.00839766	0.000431703	0.000226769	1.85807	2.46391	1.60042	-0.174092	-0.605836	0.00675988	0.00871982	0.00849483	-0.00184745	-0.00195994	4.90491	4.22645	4.89613	0.343615	0.00877735
Hy29	XXYS14.1	HN9	15.262	0.00503098	0.00123811	0.00466007	0.00208189	0.000370916	0.350724	0.0107652	0.0767113	0.306986	0.274013	0.00702976	0.00802513	0.00663048	-0.000298048	-0.000995373	4.56056	3.81205	3.87279	0.71814	0.687766
Hy30	XXYS1.4	HN9	15.248	0.00476246	0.00120114	0.00466007	0.00183186	0.000102394	0.386632	0.0161167	0.0767113	0.340218	0.309921	0.00731175	0.00898339	0.00663048	-0.000495186	-0.00167164	4.50003	3.48654	3.87279	0.820369	0.627241
Hy31	XXY26L.1	HN9	15.26	0.00498979	0.00152472	0.00466007	0.0018974	0.00032972	0.256804	0.0346553	0.0767113	0.201121	0.180093	0.00798309	0.00770186	0.00663048	0.000816916	0.000281224	4.06435	3.66001	3.87279	0.297947	0.191553
Hy32	HLJ1	HN9	7.578	0.00784339	0.00841803	0.00466007	0.00130434	-0.00057464	1.33003	2.02802	0.0767113	0.277663	-0.69799	0.00872659	0.0085429	0.00663048	0.0011399	0.000183694	4.20871	4.04684	3.87279	0.248894	0.16187
Hy33	XXY30L.2	HN9	15.337	0.0057796	0.00186509	0.00466007	0.00251701	0.00111953	0.222295	0.0285335	0.0767113	0.169672	0.145583	0.00757301	0.00858596	0.00663048	-3.5206e-05	-0.00101295	4.51803	2.81835	3.87279	1.17246	0.645235
Hy34	BJ14	HN9	7.549	0.00815091	0.00830923	0.00466007	0.00166626	-0.000158323	1.34244	1.21965	0.0767113	0.694258	0.122789	0.00819588	0.00847383	0.00663048	0.00064372	-0.000277956	4.32954	4.18066	3.87279	0.302813	0.148877
Hy35	BJ6	HN9	7.48	0.00756878	0.00575254	0.00466007	0.00236248	0.00181624	0.944562	0.440685	0.0767113	0.685864	0.503877	0.00795077	0.00701466	0.00663048	0.00112819	0.000936102	4.20299	4.53159	3.87279	0.00080284	-0.328596
Hy36	XXYS14.1	XXYS1.4	1.006	0.00240407	0.00199143	0.00220535	0.000305677	0.000198718	0.108076	0.0509781	0.0884869	0.0383439	0.0195895	0.00768771	0.00802513	0.00898339	-0.00081655	-0.00129568	3.85543	3.81205	3.48654	0.206139	0.0433849
Hy37	XXY26L.1	XXYS1.4	1.228	0.00206637	0.00133759	0.00220535	0.000294903	-0.000138979	0.0936565	0.0378899	0.0884869	0.0304681	0.00516955	0.00737264	0.00770186	0.00898339	-0.000969989	-0.00161075	4.13972	3.66001	3.48654	0.566447	0.479712
Hy38	BJ14	FJSA40.2	6.274	0.0088977	0.00830923	0.00649643	0.00149486	0.000588464	1.64228	1.21965	0.667815	0.698546	0.42263	0.00668569	0.00847383	0.00754025	-0.00132136	-0.00178815	4.70295	4.18066	4.45764	0.383805	0.245319
Hy39	XXY26L.1	FJ11	14.395	0.00708106	0.00152472	0.00880753	0.00191494	-0.00172647	1.05576	0.0346553	2.46391	-0.193523	-1.40815	0.00733816	0.00770186	0.00871982	-0.000872679	-0.00138166	4.55401	3.66001	4.22645	0.610782	0.327558
Hy40	XXY26L.1	XXYS14.1	1.144	0.00221685	0.00133759	0.00199143	0.000552344	0.00022542	0.0473503	0.0378899	0.0509781	0.00291631	-0.00362783	0.00845079	0.00770186	0.00802513	0.000587291	0.000425658	3.84286	3.66001	3.81205	0.106832	0.0308115
Hy41	XXYS1.4	XXY30L.2	1.316	0.00223256	0.00220535	0.00185011	0.000204833	2.7212e-05	0.0852928	0.0884869	0.0528871	0.0146058	-0.00319411	0.00796121	0.00898339	0.00858596	-0.000823467	-0.00102218	4.16052	3.48654	2.81835	1.00808	0.673982
Hy42	BJ15	FJ11	6.061	0.00930166	0.00674964	0.00876007	0.0015468	0.000541588	2.33446	0.504227	1.72704	1.21883	0.607428	0.0081531	0.00744115	0.00871982	7.26165e-05	-0.000566717	4.71577	5.05435	4.22645	0.0753654	-0.338581
Hy43	BJ21	FJ11	6.036	0.00951864	0.00774965	0.00876007	0.00126378	0.000758573	2.14986	1.95585	1.72704	0.308419	0.194013	0.00871517	0.00763088	0.00871982	0.000539823	-4.644e-06	4.27842	4.62278	4.22645	-0.146193	-0.344354
Hy45	BJ15	GT39.1	6.024	0.00934713	0.00674964	0.00247466	0.00473498	0.00259749	2.16389	0.504227	0.0461764	1.88869	1.65966	0.00705015	0.00744115	0.00756261	-0.000451727	-0.000512456	4.47288	5.05435	3.87976	0.00583192	-0.581464
Hy46	BJ19	GT39.1	6.152	0.00877145	0.00681128	0.00247466	0.00412848	0.00196017	2.05493	0.346462	0.0461764	1.85861	1.70847	0.00718916	0.00642101	0.00756261	0.000197351	-0.000373446	3.73179	4.52403	3.87976	-0.470104	-0.792242
Hy47	BJ21	GT39.1	6.072	0.0091592	0.00774965	0.00247466	0.00404704	0.00140955	1.95126	1.95585	0.0461764	0.95025	-0.00458528	0.00666917	0.00763088	0.00756261	-0.000927574	-0.000961712	3.74942	4.62278	3.87976	-0.501849	-0.873359
Hy48	BJ15	GT99.1	6.163	0.009295	0.00674964	0.00809837	0.001871	0.00119663	2.55797	0.504227	1.98729	1.31222	0.570685	0.00776201	0.00744115	0.00849483	-0.000205981	-0.000732823	4.62564	5.05435	4.89613	-0.349596	-0.428706
Hy49	BJ19	GT99.1	6.225	0.00916044	0.00681128	0.00809837	0.00170562	0.00106208	2.13506	0.346462	1.98729	0.968184	0.147771	0.00717342	0.00642101	0.00849483	-0.000284504	-0.00132142	4.86804	4.52403	4.89613	0.157958	-0.02809
Hy50	BJ21	GT99.1	6.178	0.00930297	0.00774965	0.00809837	0.00137896	0.0012046	1.75862	1.95585	1.98729	-0.212943	-0.228663	0.00689006	0.00763088	0.00849483	-0.00117279	-0.00160477	4.82739	4.62278	4.89613	0.0679342	-0.0687424
Hy52	BJ21	FJSA40.2	6.184	0.00940975	0.00774965	0.00650845	0.0022807	0.0016601	1.38311	1.95585	0.50885	0.150766	-0.572733	0.00685004	0.00763088	0.00754025	-0.000735529	-0.000780842	4.41575	4.62278	4.45764	-0.12445	-0.20702
Hy53	BJ19	FJSA40.2	6.177	0.00934121	0.00681128	0.00650845	0.00268134	0.00252992	1.10624	0.346462	0.50885	0.678586	0.597392	0.00714734	0.00642101	0.00754025	0.000166705	-0.000392917	4.39193	4.52403	4.45764	-0.0989078	-0.132106
Hy54	HN9	GT39.1	7.295	0.00732516	0.00474162	0.00247466	0.00371702	0.00258354	1.09891	0.113214	0.0461764	1.01921	0.985693	0.00800817	0.00663048	0.00756261	0.000911624	0.000445561	4.66939	3.87279	3.87976	0.793119	0.789638
Hy55	BJ15	HN9	7.432	0.00760858	0.00674964	0.00474162	0.00186296	0.000858946	1.4508	0.504227	0.113214	1.14208	0.946572	0.00859447	0.00744115	0.00663048	0.00155865	0.00115332	4.49888	5.05435	3.87279	0.0353073	-0.55547
Hy56	BJ21	HN9	7.407	0.00791476	0.00774965	0.00474162	0.00166913	0.000165112	1.13062	1.95585	0.113214	0.0960865	-0.82523	0.00793494	0.00763088	0.00663048	0.000804262	0.000304062	4.64161	4.62278	3.87279	0.393826	0.0188354
Hy58	BJ15	BJ19	2.22	0.00900921	0.00674964	0.00681128	0.00222875	0.00219793	2.2155	0.504227	0.346462	1.79016	1.71128	0.00671617	0.00744115	0.00642101	-0.000214911	-0.00072498	4.7557	5.05435	4.52403	-0.033494	-0.298651
Hy60	FJ11	GT39.1	1.388	0.00813796	0.00876007	0.00247466	0.00252059	-0.000622113	1.53685	1.72704	0.0461764	0.650247	-0.190183	0.00770211	0.00871982	0.00756261	-0.000439097	-0.0010177	4.12363	4.22645	3.87976	0.0705245	-0.102825
Hy61	GT39.1	GT99.1	0.74	0.00777777	0.00247466	0.00809837	0.00249126	-0.000320595	1.70048	0.0461764	1.98729	0.683745	-0.28681	0.00700358	0.00756261	0.00849483	-0.00102513	-0.00149125	4.37198	3.87976	4.89613	-0.0159637	-0.52415
Hy62	FJSA40.2	GT39.1	2.055	0.00831021	0.00650845	0.00247466	0.00381866	0.00180176	1.37325	0.50885	0.0461764	1.09573	0.864397	0.0078627	0.00754025	0.00756261	0.000311274	0.000300098	4.54601	4.45764	3.87976	0.37731	0.08837
Hy63	XXYS1.4	BJ15	14.19	0.00642567	0.00237792	0.00674964	0.00186189	-0.000323967	0.71391	0.053531	0.504227	0.435031	0.209683	0.00695709	0.00898339	0.00744115	-0.00125518	-0.0020263	4.72987	3.48654	5.05435	0.459424	-0.324481
Hy64	XXYS14.1	BJ15	14.24	0.0066438	0.00221905	0.00674964	0.00215946	-0.000105835	0.718383	0.0283705	0.504227	0.452085	0.214156	0.00702459	0.00802513	0.00744115	-0.000708553	-0.00100054	4.53181	3.81205	5.05435	0.098616	-0.522535
Hy65	XXY30L.2	BJ15	14.309	0.00723228	0.00285046	0.00674964	0.00243224	0.000482644	1.11239	0.0427635	0.504227	0.838893	0.608161	0.00727515	0.00858596	0.00744115	-0.000738408	-0.00131081	4.63591	2.81835	5.05435	0.699566	-0.418435
Hy66	XXYS14.1	BJ19	14.156	0.00536826	0.00184592	0.00640938	0.00124061	-0.00104112	0.965867	0.040374	0.876455	0.507453	0.0894121	0.00764518	0.00802513	0.00642101	0.000422112	-0.000379947	3.84896	3.81205	4.52403	-0.31908	-0.675074
Hy67	XXY26L.1	BJ19	14.164	0.00527029	0.00129907	0.00640938	0.00141607	-0.00113909	0.548228	0.0394831	0.876455	0.090259	-0.328227	0.00650021	0.00770186	0.00642101	-0.000561227	-0.00120165	4.03948	3.66001	4.52403	-0.0525392	-0.484553
Hy68	XXYS1.4	BJ21	14.17	0.00627595	0.00191302	0.0072923	0.00167329	-0.00101634	1.88547	0.0612082	1.86085	0.92444	0.0246213	0.00724979	0.00898339	0.00763088	-0.00105734	-0.00173359	4.4619	3.48654	4.62278	0.407246	-0.160874
Hy69	XXYS14.1	BJ21	14.212	0.00654759	0.00184592	0.0072923	0.00197849	-0.000744703	1.20827	0.040374	1.86085	0.257661	-0.652575	0.00839296	0.00802513	0.00763088	0.000564956	0.000367832	3.91257	3.81205	4.62278	-0.304837	-0.710202
Hy70	XXY30L.2	BJ21	14.269	0.0070286	0.00182257	0.0072923	0.00247117	-0.000263698	1.39479	0.0687294	1.86085	0.430008	-0.46605	0.00800531	0.00858596	0.00763088	-0.000103111	-0.000580651	3.68562	2.81835	4.62278	-0.0349394	-0.937154
Hy71	BJ19	HN9	7.458	0.00735516	0.00640938	0.00359328	0.00235383	0.000945781	1.80826	0.876455	0.0950028	1.32253	0.931807	0.00786323	0.00642101	0.00663048	0.00133749	0.00123275	3.95065	4.52403	3.87279	-0.247761	-0.57338
Hy72	XXY26L.1	XXY30L.2	1.269	0.00199391	0.00133759	0.00185011	0.000400057	0.000143796	0.0527669	0.0378899	0.0528871	0.00737841	-0.000120232	0.00749095	0.00770186	0.00858596	-0.000652958	-0.00109501	4.06592	3.66001	2.81835	0.826748	0.405918
Hy73	XXY26L.1	BJ15	14.25	0.00595296	0.00129907	0.0068544	0.00187623	-0.000901432	0.847766	0.0394831	1.02156	0.317247	-0.17379	0.00807316	0.00770186	0.00744115	0.000501651	0.000371293	4.81525	3.66001	5.05435	0.45807	-0.239101
Hy74	XXYS1.4	BJ19	14.121	0.00612688	0.00191302	0.00640938	0.00196567	-0.000282503	2.05325	0.0612082	0.876455	1.58442	1.1768	0.00641802	0.00898339	0.00642101	-0.00128418	-0.00256537	4.47872	3.48654	4.52403	0.473431	-0.0453172
Hy78	HN1	HN2	0.757	0.00369066	0.00275416	0.00349558	0.000565797	0.000195087	0.136663	0.0968359	0.115641	0.0304245	0.0210218	0.00896582	0.00885486	0.00915427	-3.8745e-05	-0.000188449	3.48648	3.34262	3.3386	0.145875	0.143863
Hy79	HN1	HN5	0.941	0.00314822	0.0028592	0.00203969	0.000698773	0.000289017	0.0590688	0.0952131	0.0470514	-0.0120634	-0.0361443	0.00886682	0.00885486	0.00915427	-0.000137745	-0.000287449	3.38646	3.34262	3.04985	0.19023	0.0438434
Hy80	HN1	HN7	0.77	0.00337453	0.0028592	0.00343296	0.00022845	-5.8426e-05	0.0695141	0.0952131	0.0782995	-0.0172421	-0.025699	0.00877684	0.00885486	0.00915427	-0.000227727	-0.000377431	3.35642	3.34262	2.94094	0.214641	0.0138024
Hy81	FJ5	HN1	1.185	0.00306617	0.00211574	0.00275416	0.000631226	0.000312019	0.123049	0.0448857	0.0968359	0.0521885	0.0262134	0.00896948	0.0084531	0.00885486	0.000315498	0.000114614	3.26496	2.40822	3.34262	0.389542	-0.0776605
Hy82	FJ7	HN1	1.189	0.00364967	0.00312465	0.0028592	0.000657745	0.000525022	0.114493	0.120594	0.0952131	0.00658983	-0.00610071	0.00921522	0.0085715	0.00885486	0.000502039	0.000360355	3.2676	3.20658	3.34262	-0.0070039	-0.0750227
Hy83	FJ9	HN1	1.254	0.00302238	0.00245019	0.00275416	0.00042021	0.000268228	0.104619	0.0676282	0.0968359	0.022387	0.00778312	0.00913541	0.00809308	0.00885486	0.000661438	0.000280545	3.15759	2.70952	3.34262	0.131526	-0.185026
Hy84	FJ10	HN1	1.177	0.00340909	0.00322127	0.0028592	0.000368853	0.000187819	0.111137	0.0838522	0.0952131	0.0216042	0.0159238	0.00890719	0.00916908	0.00885486	-0.000104778	-0.000261884	3.55729	3.48826	3.34262	0.141854	0.0690376
Hy85	HN2	HN3	0.466	0.00372151	0.00349558	0.00282003	0.000563703	0.00022593	0.127142	0.115641	0.0663656	0.0361389	0.011501	0.00878356	0.00915427	0.00941629	-0.000501728	-0.000632737	3.51128	3.3386	3.47375	0.105101	0.0375221
Hy86	HN2	HN5	0.691	0.00399919	0.00349558	0.00224506	0.00112886	0.000503609	0.168597	0.115641	0.0581924	0.0816804	0.052956	0.00882036	0.00915427	0.00914793	-0.000330744	-0.000333913	3.28392	3.3386	3.04985	0.0896959	-0.0546783
Hy87	HN2	HN7	0.55	0.00407466	0.00349558	0.00364988	0.000501932	0.00042478	0.159718	0.115641	0.123543	0.0401256	0.0361747	0.00901058	0.00915427	0.00936052	-0.000246813	-0.000349937	3.35149	3.3386	2.94094	0.211722	0.012895
Hy88	FJ5	HN2	0.991	0.00332766	0.00211574	0.00349558	0.000521998	-0.000167918	0.114193	0.0448857	0.115641	0.0339298	-0.00144804	0.00833364	0.0084531	0.00915427	-0.000470049	-0.000820637	3.1564	2.40822	3.3386	0.282994	-0.182197
Hy89	FJ7	HN2	1.01	0.00426437	0.0034633	0.00349558	0.000784929	0.00076879	0.175023	0.104707	0.115641	0.0648487	0.0593816	0.00918674	0.0085715	0.00915427	0.000323852	3.2463e-05	3.40106	3.20658	3.3386	0.128466	0.0624596
Hy90	FJ8	HN2	1.043	0.00359675	0.00277025	0.00349558	0.000463832	0.00010117	0.138162	0.0856964	0.115641	0.0374928	0.0225203	0.00869197	0.00910408	0.00915427	-0.000437208	-0.000462305	3.35477	2.87751	3.3386	0.246717	0.016176
Hy91	FJ10	HN2	1.098	0.0038626	0.0031105	0.00349558	0.000559562	0.000367025	0.161848	0.100611	0.115641	0.0537219	0.0462069	0.00894558	0.00916908	0.00915427	-0.000216098	-0.0002235	3.54794	3.48826	3.3386	0.134513	0.0596837
Hy92	FJ8	HN1	1.281	0.00331396	0.00277025	0.00275416	0.000551751	0.000543703	0.13406	0.0856964	0.0968359	0.0427938	0.0372241	0.00918883	0.00910408	0.00885486	0.000209358	8.4751e-05	3.21389	2.87751	3.34262	0.103819	-0.128734
Hy93	HN3	HN5	0.71	0.00319937	0.00282003	0.00224506	0.00066682	0.000379338	0.0815165	0.0663656	0.0581924	0.0192375	0.015151	0.0101503	0.00941629	0.00914793	0.000868161	0.000733983	3.42884	3.47375	3.04985	0.167043	-0.0449105
Hy94	HN3	HN7	0.51	0.0037848	0.00282003	0.00364988	0.000549848	0.000134922	0.106525	0.0663656	0.123543	0.0115706	-0.0170182	0.0103006	0.00941629	0.00936052	0.000912149	0.000884263	3.39139	3.47375	2.94094	0.184044	-0.0823615
Hy95	FJ5	HN3	0.954	0.00313657	0.00211574	0.00282003	0.000668686	0.000316543	0.139083	0.0448857	0.0663656	0.0834573	0.0727173	0.00859637	0.0084531	0.00941629	-0.00033832	-0.000819917	2.92888	2.40822	3.47375	-0.012104	-0.544874
Hy96	FJ7	HN3	0.97	0.00384511	0.0034633	0.00282003	0.000703448	0.000381814	0.166053	0.104707	0.0663656	0.080517	0.0613463	0.00900368	0.0085715	0.00941629	9.782e-06	-0.000412616	3.2389	3.20658	3.47375	-0.101266	-0.234852
Hy97	FJ9	HN3	1.006	0.00279785	0.00245019	0.00282003	0.000162735	-2.2183e-05	0.0962946	0.0676282	0.0663656	0.0292978	0.0286665	0.00963175	0.00809308	0.00941629	0.000877061	0.000215455	2.91485	2.70952	3.47375	-0.176784	-0.558903
Hy98	FJ5	HN5	1.023	0.00239586	0.00211574	0.00224506	0.000215455	0.000150794	0.0763632	0.0448857	0.0581924	0.0248241	0.0181707	0.00956023	0.0084531	0.00914793	0.000759715	0.000412296	3.08021	2.40822	3.04985	0.351179	0.0303621
Hy99	FJ7	HN5	0.979	0.00307479	0.0034633	0.00224506	0.000220611	-0.000388506	0.0905227	0.104707	0.0581924	0.00907296	-0.0141843	0.0100042	0.0085715	0.00914793	0.00114452	0.0008563	3.22291	3.20658	3.04985	0.0946941	0.0163266
Hy100	FJ9	HN5	1.01	0.0025334	0.00245019	0.00224506	0.00018577	8.3205e-05	0.0665584	0.0676282	0.0581924	0.00364813	-0.00106974	0.0101779	0.00809308	0.00914793	0.00155739	0.00102997	3.13266	2.70952	3.04985	0.252975	0.0828086
Hy101	FJ10	HN5	1.02	0.00295875	0.0031105	0.00224506	0.000280967	-0.000151752	0.0762975	0.100611	0.0581924	-0.00310443	-0.0243139	0.00920732	0.00916908	0.00914793	4.881e-05	3.8239e-05	3.31357	3.48826	3.04985	0.0445162	-0.174687
Hy102	FJ8	HN7	1.089	0.00336444	0.00277025	0.00364988	0.000154376	-0.000285438	0.112476	0.0856964	0.123543	0.00785663	-0.0110668	0.0104525	0.00910408	0.00936052	0.00122017	0.00109195	3.4483	2.87751	2.94094	0.539074	0.50736
Hy103	FJ9	HN7	1.074	0.00282699	0.00245019	0.00364988	-0.00022305	-0.000822894	0.101328	0.0676282	0.123543	0.0057423	-0.0222152	0.00823701	0.00809308	0.00936052	-0.000489787	-0.00112351	3.11789	2.70952	2.94094	0.292663	0.17695
Hy104	FJ10	HN7	1.1	0.00339618	0.0031105	0.00364988	1.5989e-05	-0.0002537	0.111709	0.100611	0.123543	-0.000368141	-0.011834	0.00840468	0.00916908	0.00936052	-0.000860117	-0.000955838	3.53532	3.48826	2.94094	0.320724	0.0470678
Hy105	FJ5	FJ7	0.564	0.00232708	0.00211574	0.0034633	-0.000462444	-0.00113622	0.0480846	0.0448857	0.104707	-0.0267118	-0.0566224	0.00914666	0.0084531	0.0085715	0.000634364	0.000575165	2.38352	2.40822	3.20658	-0.423881	-0.823065
Hy106	FJ5	FJ8	0.659	0.00225635	0.00211574	0.00277025	-0.000186648	-0.000513903	0.0487032	0.0448857	0.0856964	-0.0165878	-0.0369932	0.00915366	0.0084531	0.00910408	0.000375074	4.9583e-05	2.32506	2.40822	2.87751	-0.317809	-0.552459
Hy107	FJ7	FJ8	0.493	0.00295905	0.0034633	0.00277025	-0.000157723	-0.000504246	0.0871863	0.104707	0.0856964	-0.00801541	-0.0175207	0.00874437	0.0085715	0.00910408	-9.3414e-05	-0.000359706	3.1128	3.20658	2.87751	0.0707549	-0.0937795
Hy108	FJ7	FJ10	0.484	0.00326877	0.0034633	0.0031105	-1.8134e-05	-0.000194532	0.0591669	0.104707	0.100611	-0.0434923	-0.0455401	0.0092099	0.0085715	0.00916908	0.000339611	4.0821e-05	2.81364	3.20658	3.48826	-0.533777	-0.674613
Hy109	FJ8	FJ9	0.361	0.00275585	0.00277025	0.00245019	0.000145631	-1.4398e-05	0.0756641	0.0856964	0.0676282	-0.000998125	-0.0100322	0.00860239	0.00910408	0.00809308	3.807e-06	-0.000501693	2.83671	2.87751	2.70952	0.0431909	-0.0408082
Hy110	FJ8	FJ10	0.563	0.00315224	0.00277025	0.0031105	0.000211867	4.1742e-05	0.105528	0.0856964	0.100611	0.0123744	0.00491685	0.00918498	0.00910408	0.00916908	4.84055e-05	1.5907e-05	2.95621	2.87751	3.48826	-0.226677	-0.532047
Hy111	FJ9	FJ10	0.445	0.00310804	0.00245019	0.0031105	0.000327695	-2.46e-06	0.0735452	0.0676282	0.100611	-0.0105746	-0.0270662	0.00862984	0.00809308	0.00916908	-1.2375e-06	-0.000539236	2.64606	2.70952	3.48826	-0.452823	-0.842193
Hy112	HN5	HN7	0.663	0.00376891	0.00224506	0.00364988	0.000821437	0.000119029	0.106567	0.0581924	0.123543	0.0156991	-0.0169763	0.00886505	0.00914793	0.00936052	-0.000389182	-0.000495474	3.27299	3.04985	2.94094	0.277595	0.223142
Hy113	FJ8	HN5	1.041	0.00315135	0.00300878	0.00254743	0.000373246	0.000142575	0.0927222	0.0802018	0.0787821	0.0132303	0.0125204	0.00856342	0.00910408	0.00914793	-0.000562591	-0.000584518	3.19358	2.87751	3.04985	0.229897	0.14373
Hy114	FJ7	HN7	1.041	0.00384777	0.0034633	0.00364988	0.000291179	0.000197888	0.15657	0.104707	0.123543	0.0424449	0.0330268	0.0087445	0.0085715	0.00936052	-0.000221504	-0.000616016	3.47241	3.20658	2.94094	0.398645	0.265825
Hy115	FJ5	FJ9	0.589	0.00247234	0.00211574	0.00245019	0.000189372	2.2147e-05	0.0558363	0.0448857	0.0676282	-0.000420609	-0.0117919	0.00974325	0.0084531	0.00809308	0.00147016	0.00129015	2.74562	2.40822	2.70952	0.186754	0.0361039
Hy116	FJ5	FJ10	0.591	0.00284424	0.00211574	0.0031105	0.000231116	-0.000266264	0.079846	0.0448857	0.100611	0.00709748	-0.0207654	0.00951024	0.0084531	0.00916908	0.000699149	0.000341159	3.02995	2.40822	3.48826	0.08171	-0.45831
Hy117	FJ7	FJ9	0.432	0.0031166	0.0034633	0.00245019	0.000159853	-0.000346699	0.0830221	0.104707	0.0676282	-0.00314553	-0.0216849	0.00990871	0.0085715	0.00809308	0.00157642	0.00133721	3.07807	3.20658	2.70952	0.120019	-0.128514
Hy118	FJ8	HN3	1.067	0.00372791	0.00277025	0.00282003	0.000932769	0.00090788	0.120759	0.0856964	0.0663656	0.044728	0.0350626	0.00904336	0.00910408	0.00941629	-0.000216823	-0.000372929	3.21267	2.87751	3.47375	0.0370401	-0.26108
Hy119	HN1	HN3	0.488	0.00319707	0.00275416	0.00282003	0.000409977	0.00037704	0.091631	0.0968359	0.0663656	0.0100302	-0.00520495	0.0087413	0.00885486	0.00941629	-0.000394275	-0.000674989	3.57803	3.34262	3.47375	0.169842	0.104275
Hy120	FJ10	HN3	0.996	0.00394637	0.0031105	0.00282003	0.000981102	0.000835865	0.133234	0.100611	0.0663656	0.0497459	0.0326229	0.00851093	0.00916908	0.00941629	-0.000781757	-0.000905365	3.63174	3.48826	3.47375	0.15073	0.14348
Hy121	FJ5	HN7	0.99	0.00296224	0.00211574	0.00364988	7.94265e-05	-0.000687642	0.0983047	0.0448857	0.123543	0.0140903	-0.0252384	0.00835148	0.0084531	0.00936052	-0.000555329	-0.00100904	3.04796	2.40822	2.94094	0.373378	0.107014
Hy122	FJ5	HN6	1.238	0.00253666	0.00211574	0.00218625	0.000385669	0.000350418	0.0567098	0.0448857	0.0411945	0.0136697	0.0118241	0.0080583	0.0084531	0.00915556	-0.000746033	-0.00109726	3.01941	2.40822	3.05257	0.28902	-0.033155
Hy123	FJ7	HN6	1.185	0.00355005	0.0034633	0.00218625	0.000725277	8.675e-05	0.0941581	0.104707	0.0411945	0.0212074	-0.0105489	0.00839782	0.0085715	0.00915556	-0.000465702	-0.000757734	3.44342	3.20658	3.05257	0.313849	0.23684
Hy124	FJ9	HN2	1.026	0.00402508	0.00245019	0.00349558	0.0010522	0.000529504	0.139863	0.0676282	0.115641	0.0482282	0.0242215	0.00807488	0.00809308	0.00915427	-0.000548795	-0.00107939	3.36112	2.70952	3.3386	0.337065	0.022525
Hy125	HN1	HN6	0.672	0.00353974	0.00275416	0.00218625	0.00106954	0.000785583	0.0890386	0.0968359	0.0411945	0.0200234	-0.00779735	0.00816736	0.00885486	0.00915556	-0.000837854	-0.000988201	3.48688	3.34262	3.05257	0.28929	0.144262
Hy126	HN3	HN6	0.916	0.00365465	0.00282003	0.00218625	0.00115151	0.000834618	0.145849	0.0663656	0.0411945	0.0920692	0.0794836	0.00961293	0.00941629	0.00915556	0.000327007	0.000196641	3.31867	3.47375	3.05257	0.0555135	-0.155081
Hy127	HN5	HN6	0.468	0.0022202	0.00224506	0.00218625	4.5485e-06	-2.4861e-05	0.0653829	0.0581924	0.0411945	0.0156895	0.00719049	0.00983491	0.00914793	0.00915556	0.000683168	0.000679356	3.19455	3.04985	3.05257	0.14334	0.141981
Hy128	SX2	SX3	0.964	0.00342697	0.00285135	0.00299707	0.000502763	0.000429903	0.107394	0.0878237	0.105399	0.0107829	0.0019951	0.00971119	0.00923799	0.00857026	0.000807063	0.000473197	3.22719	3.07413	3.34422	0.0180152	-0.117029
Hy129	SX2	SX4	0.951	0.00459421	0.00285135	0.0049532	0.000691934	-0.000358991	0.225912	0.0878237	0.37365	-0.00482446	-0.147737	0.00881599	0.00923799	0.00773101	0.000331486	-0.000422003	3.27869	3.07413	3.48246	0.000385994	-0.203779
Hy130	SX2	SX5	0.323	0.00438634	0.00285135	0.00536936	0.000275992	-0.000983012	0.22124	0.0878237	0.303263	0.0256963	-0.0820234	0.00814492	0.00923799	0.00797646	-0.000462301	-0.00109307	3.24227	3.07413	3.4092	0.000600742	-0.166932
Hy131	SX2	SX6	1.101	0.00503104	0.00285135	0.00490602	0.00115235	0.000125017	0.340758	0.0878237	0.346955	0.123368	-0.00619739	0.00836796	0.00923799	0.00844661	-0.000474335	-0.000870024	3.26566	3.07413	3.52428	-0.0335421	-0.258615
Hy132	FJ8	HN6	1.28	0.00309821	0.00277025	0.00218625	0.000619966	0.000327962	0.11062	0.0856964	0.0411945	0.0471746	0.0249237	0.00966573	0.00910408	0.00915556	0.000535909	0.000510169	3.60492	2.87751	3.05257	0.639883	0.552358
Hy133	SX3	SX4	0.934	0.0046749	0.00299707	0.0049532	0.000699762	-0.000278303	0.217582	0.105399	0.37365	-0.0219426	-0.156068	0.00802396	0.00857026	0.00773101	-0.000126672	-0.000546295	3.33777	3.34422	3.48246	-0.0755695	-0.14469
Hy134	SX3	SX5	0.995	0.00499178	0.00299707	0.00536936	0.000808563	-0.000377581	0.246926	0.105399	0.303263	0.042595	-0.056337	0.00910796	0.00857026	0.00797646	0.000834605	0.000537707	3.38607	3.34422	3.4092	0.0093603	-0.0231286
Hy135	SX3	SX6	1.131	0.00462024	0.00299707	0.00490602	0.000668694	-0.000285781	0.200367	0.105399	0.346955	-0.0258103	-0.146588	0.0075046	0.00857026	0.00844661	-0.00100383	-0.00106565	3.20927	3.34422	3.52428	-0.22498	-0.315009
Hy136	SX3	SX7	1.959	0.00490665	0.00299707	0.00558332	0.000616455	-0.000676672	0.261261	0.105399	0.220964	0.0980796	0.0402974	0.00908875	0.00857026	0.00891313	0.000347056	0.000175617	3.40657	3.34422	3.47832	-0.00470784	-0.0717585
Hy137	SX4	SX6	0.377	0.00494772	0.0049532	0.00490602	1.8108e-05	-5.482e-06	0.474649	0.37365	0.346955	0.114347	0.101	0.0081433	0.00773101	0.00844661	5.44895e-05	-0.000303311	3.48446	3.48246	3.52428	-0.0189154	-0.039823
Hy138	SX5	SX6	1.177	0.00576446	0.00536936	0.00490602	0.000626768	0.000395099	0.462252	0.303263	0.346955	0.137143	0.115297	0.00770904	0.00797646	0.00844661	-0.000502499	-0.000737574	3.54943	3.4092	3.52428	0.0826932	0.0251537
Hy139	SX5	SX7	1.951	0.00638801	0.00536936	0.00558332	0.000911668	0.000804684	0.539264	0.303263	0.220964	0.27715	0.236	0.00854994	0.00797646	0.00891313	0.000105142	-0.000363194	3.49227	3.4092	3.47832	0.0485057	0.0139439
Hy140	HN2	HN6	0.991	0.00424958	0.00349558	0.00218625	0.00140867	0.000754006	0.182463	0.115641	0.0411945	0.104045	0.0668217	0.00974561	0.00915427	0.00915556	0.000590691	0.000590048	3.67037	3.3386	3.05257	0.474786	0.33177
Hy141	FJ9	HN6	1.221	0.00284582	0.00245019	0.00218625	0.000527602	0.000395628	0.108978	0.0676282	0.0411945	0.0545665	0.0413497	0.00872202	0.00809308	0.00915556	9.76965e-05	-0.000433543	3.03236	2.70952	3.05257	0.151321	-0.0202031
Hy142	FJ10	HN6	1.14	0.00351741	0.0031105	0.00218625	0.000869037	0.000406908	0.164555	0.100611	0.0411945	0.0936522	0.0639438	0.00915833	0.00916908	0.00915556	-3.992e-06	-1.0751e-05	3.50476	3.48826	3.05257	0.234352	0.0165069
Hy143	SX2	SX7	1.918	0.00547035	0.00285135	0.00558332	0.00125302	-0.000112971	0.259074	0.0878237	0.220964	0.10468	0.0381101	0.00808753	0.00923799	0.00891313	-0.000988035	-0.00115046	3.32219	3.07413	3.47832	0.0459611	-0.156134
Hy144	SX4	SX5	0.983	0.00582458	0.0049532	0.00536936	0.000663303	0.000455225	0.349095	0.37365	0.303263	0.0106388	-0.0245543	0.00771263	0.00773101	0.00797646	-0.000141104	-0.000263829	3.58347	3.48246	3.4092	0.137642	0.10101
Hy145	SX4	SX7	1.867	0.00596736	0.0049532	0.00558332	0.000699101	0.000384038	0.451888	0.37365	0.220964	0.154581	0.0782382	0.00759224	0.00773101	0.00891313	-0.00072983	-0.00132089	3.44717	3.48246	3.47832	-0.0332234	-0.0352935
Hy146	SX2	HN1	10.947	0.00617415	0.00285135	0.00305489	0.00322103	0.00311926	0.675601	0.0878237	0.104004	0.579687	0.571597	0.00724874	0.00923799	0.00822459	-0.00148255	-0.00198924	3.28233	3.07413	3.46672	0.0119005	-0.184391
Hy147	SX2	HN2	10.795	0.00602148	0.00285135	0.00357578	0.00280792	0.0024457	0.434532	0.0878237	0.128505	0.326367	0.306026	0.00788709	0.00923799	0.00956309	-0.00151345	-0.001676	3.29836	3.07413	3.5129	0.00484174	-0.214543
Hy148	SX2	FJ7	10.862	0.00637692	0.00285135	0.00347218	0.00321516	0.00290474	0.527972	0.0878237	0.0815555	0.443282	0.440148	0.00746494	0.00923799	0.00955086	-0.00192948	-0.00208592	3.22187	3.07413	2.92653	0.221539	0.147735
Hy149	SX2	FJ10	10.875	0.00630741	0.00285135	0.00346433	0.00314957	0.00284308	0.515583	0.0878237	0.12401	0.409666	0.391573	0.00809198	0.00923799	0.00915981	-0.00110692	-0.00114601	3.09195	3.07413	3.55708	-0.223656	-0.465127
Hy151	SX2	HN6	10.954	0.00601028	0.00285135	0.00252577	0.00332172	0.00315893	0.447455	0.0878237	0.09622	0.355434	0.351235	0.00792609	0.00923799	0.0090202	-0.00120301	-0.0013119	3.03676	3.07413	3.42144	-0.211025	-0.384677
Hy152	SX2	FJ5	10.849	0.00590183	0.00285135	0.00219661	0.00337786	0.00305048	0.455949	0.0878237	0.0443272	0.389874	0.368126	0.00780873	0.00923799	0.00898675	-0.00130364	-0.00142925	2.69326	3.07413	2.59591	-0.141758	-0.38087
Hy153	SX2	FJ8	10.878	0.00615996	0.00285135	0.00300878	0.00322989	0.00315118	0.451044	0.0878237	0.0802018	0.367031	0.36322	0.0076541	0.00923799	0.0089352	-0.00143249	-0.00158389	2.95424	3.07413	2.98911	-0.0773766	-0.119889
Hy154	SX2	FJ9	10.828	0.00617655	0.00285135	0.00252169	0.00349004	0.0033252	0.277585	0.0878237	0.0489863	0.20918	0.189761	0.00792314	0.00923799	0.00801194	-0.000701826	-0.00131485	2.89982	3.07413	2.5525	0.0865096	-0.17431
Hy155	SX3	HN1	11.069	0.00663704	0.00299707	0.00305489	0.00361106	0.00358215	0.701043	0.105399	0.104004	0.596342	0.595644	0.00771409	0.00857026	0.00822459	-0.000683337	-0.000856169	3.20634	3.34422	3.46672	-0.19913	-0.260377
Hy156	SX3	HN2	10.901	0.00615576	0.00299707	0.00357578	0.00286934	0.00257998	0.533748	0.105399	0.128505	0.416796	0.405243	0.00800151	0.00857026	0.00956309	-0.00106516	-0.00156158	3.14539	3.34422	3.5129	-0.283178	-0.367518
Hy157	SX3	FJ5	10.947	0.0059677	0.00299707	0.00219661	0.00337086	0.00297063	0.472797	0.105399	0.0443272	0.397934	0.367398	0.0083184	0.00857026	0.00898675	-0.000460099	-0.000668348	2.90494	3.34422	2.59591	-0.0651295	-0.439286
Hy158	SX3	FJ7	10.898	0.0065123	0.00299707	0.00347218	0.00327768	0.00304012	0.551598	0.105399	0.0815555	0.458121	0.446199	0.00936541	0.00857026	0.00955086	0.000304849	-0.000185454	2.94604	3.34422	2.92653	-0.189336	-0.398185
Hy159	SX3	FJ9	10.864	0.00596366	0.00299707	0.00252169	0.00320428	0.00296659	0.3561	0.105399	0.0489863	0.278907	0.2507	0.00913969	0.00857026	0.00801194	0.000848589	0.000569432	3.00841	3.34422	2.5525	0.0600477	-0.335816
Hy160	SX3	FJ10	10.908	0.00653603	0.00299707	0.00346433	0.00330533	0.0030717	0.845206	0.105399	0.12401	0.730501	0.721196	0.00814631	0.00857026	0.00915981	-0.000718726	-0.0010135	3.23959	3.34422	3.55708	-0.211064	-0.31749
Hy161	SX2	HN7	10.829	0.00592981	0.00285135	0.00376632	0.00262098	0.00216349	0.394833	0.0878237	0.155826	0.273009	0.239008	0.00819346	0.00923799	0.00911863	-0.000984851	-0.00104453	3.19354	3.07413	3.47101	-0.0790331	-0.277469
Hy162	SX2	HN5	10.826	0.00566795	0.00285135	0.00254743	0.00296856	0.0028166	0.446893	0.0878237	0.0787821	0.363591	0.35907	0.00840484	0.00923799	0.00939202	-0.000910165	-0.00098718	3.13787	3.07413	3.5325	-0.165447	-0.39463
Hy163	SX3	HN6	11.016	0.00585221	0.00299707	0.00252577	0.0030908	0.00285514	0.514454	0.105399	0.09622	0.413645	0.409055	0.00793592	0.00857026	0.0090202	-0.000859312	-0.00108429	3.07725	3.34422	3.42144	-0.305583	-0.344192
Hy164	SX3	HN7	10.912	0.00632639	0.00299707	0.00376632	0.0029447	0.00256007	0.586801	0.105399	0.155826	0.456188	0.430975	0.00769619	0.00857026	0.00911863	-0.00114825	-0.00142244	3.22123	3.34422	3.47101	-0.186382	-0.249774
Hy165	SX4	HN1	11.047	0.0066804	0.0049532	0.00305489	0.00267635	0.0017272	1.0456	0.37365	0.104004	0.80677	0.671947	0.00793322	0.00773101	0.00822459	-4.4576e-05	-0.000291366	3.53821	3.48246	3.46672	0.0636225	0.0557488
Hy166	SX4	HN2	10.888	0.00641083	0.0049532	0.00357578	0.00214634	0.00145763	0.867376	0.37365	0.128505	0.616299	0.493726	0.00844077	0.00773101	0.00956309	-0.000206282	-0.00112232	3.64025	3.48246	3.5129	0.142565	0.127345
Hy167	SX4	HN5	10.915	0.00624591	0.0049532	0.00254743	0.0024956	0.00129271	0.638982	0.37365	0.0787821	0.412766	0.265332	0.00793646	0.00773101	0.00939202	-0.00062506	-0.00145556	3.48323	3.48246	3.5325	-0.0242531	-0.0492707
Hy168	SX4	HN6	11.052	0.00586605	0.0049532	0.00252577	0.00212657	0.00091285	0.480429	0.37365	0.09622	0.245494	0.10678	0.00857551	0.00773101	0.0090202	0.000199902	-0.000444695	3.41659	3.48246	3.42144	-0.0353649	-0.0658775
Hy169	SX4	HN7	10.905	0.00641763	0.0049532	0.00376632	0.00205787	0.00146444	0.442881	0.37365	0.155826	0.178143	0.0692314	0.00887517	0.00773101	0.00911863	0.000450351	-0.000243458	3.35783	3.48246	3.47101	-0.118901	-0.124631
Hy170	SX5	HN1	11.048	0.00693491	0.00536936	0.00305489	0.00272279	0.00156556	0.93368	0.303263	0.104004	0.730046	0.630417	0.008361	0.00797646	0.00822459	0.000260477	0.000136412	3.3875	3.4092	3.46672	-0.0504606	-0.0792187
Hy171	SX5	HN2	10.875	0.00669618	0.00536936	0.00357578	0.00222361	0.00132682	0.776872	0.303263	0.128505	0.560988	0.473609	0.00827719	0.00797646	0.00956309	-0.000492582	-0.0012859	3.493	3.4092	3.5129	0.0319459	-0.0199055
Hy172	SX5	HN3	10.927	0.00698282	0.00536936	0.00280097	0.00289766	0.00161347	0.933064	0.303263	0.0594537	0.751705	0.6298	0.00825374	0.00797646	0.00947402	-0.000471497	-0.00122028	3.49997	3.4092	3.2057	0.192518	0.0907698
Hy173	SX5	HN5	10.897	0.00607208	0.00536936	0.00254743	0.00211368	0.000702719	0.632665	0.303263	0.0787821	0.441642	0.329402	0.00857529	0.00797646	0.00939202	-0.000108954	-0.000816733	3.46646	3.4092	3.5325	-0.00439451	-0.0660439
Hy174	SX5	HN6	11.048	0.00627994	0.00536936	0.00252577	0.00233238	0.000910585	0.477698	0.303263	0.09622	0.277957	0.174435	0.00865128	0.00797646	0.0090202	0.000152951	-0.000368921	3.53027	3.4092	3.42144	0.11495	0.108831
Hy175	SX5	HN7	10.891	0.0064841	0.00536936	0.00376632	0.00191626	0.00111474	0.45866	0.303263	0.155826	0.229116	0.155397	0.00899121	0.00797646	0.00911863	0.000443665	-0.000127419	3.57707	3.4092	3.47101	0.136968	0.106065
Hy176	SX4	HN3	10.933	0.00647508	0.0049532	0.00280097	0.00259799	0.00152188	0.893424	0.37365	0.0594537	0.676873	0.519775	0.00794001	0.00773101	0.00947402	-0.000662505	-0.00153401	3.74887	3.48246	3.2057	0.404782	0.266401
Hy177	SX5	FJ10	10.951	0.00681929	0.00536936	0.00346433	0.00240245	0.00144993	0.851086	0.303263	0.12401	0.637449	0.547823	0.00793553	0.00797646	0.00915981	-0.000632607	-0.00122428	3.65209	3.4092	3.55708	0.168953	0.0950154
Hy178	SX6	FJ7	11.029	0.00684762	0.00490602	0.00347218	0.00265852	0.0019416	0.771303	0.346955	0.0815555	0.557048	0.424348	0.00880865	0.00844661	0.00955086	-0.000190086	-0.000742211	3.59788	3.52428	2.92653	0.372478	0.0736013
Hy179	SX6	FJ9	11.012	0.00656138	0.00490602	0.00252169	0.00284753	0.00165536	0.56801	0.346955	0.0489863	0.37004	0.221055	0.00801089	0.00844661	0.00801194	-0.000218382	-0.000435717	3.39714	3.52428	2.5525	0.358754	-0.127138
Hy180	SX6	FJ10	11.011	0.00643976	0.00329227	0.00350315	0.00304204	0.0029366	0.884397	0.102947	0.155365	0.755241	0.729032	0.00756079	0.00837531	0.00734381	-0.000298774	-0.000814529	3.4397	3.55737	3.62781	-0.152889	-0.188109
Hy181	SX7	FJ10	10.891	0.00723825	0.00591655	0.00370389	0.00242803	0.0013217	0.818299	0.385598	0.147761	0.551619	0.4327	0.00305871	0.00287492	0.00302804	0.000107233	3.0675e-05	2.7805	2.85073	3.08322	-0.186473	-0.302718
Hy182	SX4	FJ5	10.932	0.00608168	0.00388438	0.00210614	0.00308642	0.0021973	0.668882	0.185406	0.0552636	0.548547	0.483476	0.00720141	0.00777775	0.00694401	-0.000159468	-0.000576336	3.07417	3.32538	3.039	-0.108025	-0.251215
Hy183	SX4	FJ7	10.955	0.00683776	0.00388438	0.00325351	0.00326882	0.00295338	1.00487	0.185406	0.119523	0.852408	0.819466	0.00858937	0.00777775	0.0086875	0.000356749	-9.8127e-05	3.17455	3.32538	3.38562	-0.18095	-0.211068
Hy184	SX4	FJ9	10.914	0.00677693	0.00497011	0.00240828	0.00308774	0.00180682	0.766195	0.407769	0.0719199	0.52635	0.358425	0.00227866	0.00322867	0.00178162	-0.000226485	-0.000950014	2.57117	2.99957	2.35217	-0.104697	-0.428394
Hy185	SX4	FJ10	10.958	0.00662978	0.00388438	0.00350315	0.00293601	0.0027454	0.918658	0.185406	0.155365	0.748273	0.733252	0.00851654	0.00777775	0.00734381	0.000955765	0.000738795	3.22566	3.32538	3.62781	-0.250933	-0.402147
Hy186	SX5	FJ7	10.936	0.00700756	0.00173233	0.00325351	0.00451464	0.00375405	0.985864	0.0522548	0.119523	0.899975	0.866341	0.00762999	0.0076334	0.0086875	-0.000530456	-0.00105751	3.33869	2.87802	3.38562	0.206866	-0.0469333
Hy187	SX5	FJ5	10.915	0.00663799	0.00539205	0.00223062	0.00282665	0.00124594	0.617129	0.315645	0.0670296	0.425792	0.301484	0.00228214	0.00289324	0.00166196	4.5375e-06	-0.000611104	2.57438	3.04635	2.25229	-0.074944	-0.471977
Hy188	SX4	FJ8	10.962	0.00682168	0.00497011	0.00327529	0.00269898	0.00185157	0.886184	0.407769	0.120611	0.621994	0.478415	0.00219063	0.00322867	0.00218376	-0.000515582	-0.00103804	2.67262	2.99957	2.77617	-0.215246	-0.326945
Hy189	SX5	FJ8	10.929	0.00669863	0.00173233	0.00277089	0.00444701	0.00392773	0.866942	0.0522548	0.102845	0.789392	0.764096	0.00779552	0.0076334	0.00793129	1.3173e-05	-0.000135771	3.45269	2.87802	3.32558	0.350893	0.127115
Hy190	SX6	FJ8	11.067	0.00622462	0.00329227	0.00277089	0.00319304	0.00293235	0.717629	0.102947	0.102845	0.614733	0.614682	0.00753982	0.00837531	0.00793129	-0.000613485	-0.000835499	3.46893	3.55737	3.32558	0.027451	-0.0884464
Hy191	SX6	HN1	11.02	0.00638081	0.00419613	0.00297186	0.00279682	0.00218468	0.735254	0.230115	0.105512	0.56744	0.505139	0.00350687	0.00344341	0.00283328	0.000368528	6.346e-05	3.24024	2.8762	2.99466	0.30481	0.245576
Hy192	SX6	HN7	10.99	0.00673656	0.00419613	0.00387718	0.00269991	0.00254043	0.709616	0.230115	0.198694	0.495212	0.479501	0.00307961	0.00344341	0.00265977	2.8018e-05	-0.000363804	3.09259	2.8762	2.91362	0.197681	0.178967
Hy193	SX7	HN6	10.997	0.00680962	0.00591655	0.00227274	0.00271497	0.000893069	0.849131	0.385598	0.0881614	0.612251	0.463533	0.00258587	0.00287492	0.00314941	-0.000426301	-0.000563546	2.85567	2.85073	2.94363	-0.0415076	-0.0879581
Hy194	SX7	HN7	10.842	0.00745282	0.00591655	0.00387718	0.00255595	0.00153627	1.00105	0.385598	0.198694	0.708901	0.615449	0.00264801	0.00287492	0.00265977	-0.000119339	-0.000226916	2.89158	2.85073	2.91362	0.00939958	-0.0220487
Hy195	SX7	FJ5	10.868	0.00739886	0.00591655	0.00223062	0.00332528	0.00148232	0.982087	0.385598	0.0670296	0.755773	0.596488	0.00262857	0.00287492	0.00166196	0.000360132	-0.000246349	2.74849	2.85073	2.25229	0.196986	-0.102233
Hy196	SX6	HN5	10.998	0.00600714	0.00329227	0.00228091	0.00322055	0.00271487	0.631898	0.102947	0.0713262	0.544761	0.528951	0.00764629	0.00837531	0.0084316	-0.000757173	-0.000785316	3.36415	3.55737	3.77661	-0.302841	-0.41246
Hy197	SX3	FJ8	10.912	0.00649352	0.00294024	0.00327529	0.00338576	0.00321824	0.714174	0.0957899	0.120611	0.605974	0.593563	0.00216698	0.00383827	0.00218376	-0.00084404	-0.0016713	2.68714	3.11025	2.77617	-0.256075	-0.423117
Hy198	SX6	HN2	10.999	0.00680861	0.00419613	0.00372904	0.00284603	0.00261249	1.24621	0.230115	0.158002	1.05215	1.01609	0.00257211	0.00344341	0.00295408	-0.000626633	-0.000871301	3.01064	2.8762	3.07918	0.0329493	-0.0685436
Hy199	SX7	HN1	10.994	0.00576461	0.00591655	0.00297186	0.0013204	-0.000151942	0.383906	0.385598	0.105512	0.13835	-0.00169272	0.00279097	0.00287492	0.00283328	-6.3133e-05	-8.3956e-05	2.99463	2.85073	2.99466	0.0719297	-3.8532e-05
Hy200	SX6	HN3	11.01	0.00615823	0.00419613	0.00273818	0.00269108	0.00196211	0.63482	0.230115	0.0555006	0.492012	0.404705	0.00279981	0.00344341	0.00379087	-0.000817329	-0.000991056	3.05575	2.8762	3.00621	0.114549	0.0495431
Hy201	SX6	HN6	11.029	0.00627465	0.00419613	0.00227274	0.00304021	0.00207852	0.574198	0.230115	0.0881614	0.41506	0.344083	0.00299765	0.00344341	0.00314941	-0.000298764	-0.000445765	3.03696	2.8762	2.94363	0.127047	0.0933312
Hy202	SX7	HN2	10.811	0.00692097	0.00591655	0.00372904	0.00209818	0.00100442	0.578374	0.385598	0.158002	0.306574	0.192776	0.00351393	0.00287492	0.00295408	0.000599432	0.000559854	3.0513	2.85073	3.07918	0.0863465	-0.0278807
Hy203	SX7	HN5	10.85	0.00696119	0.00591655	0.00267452	0.00266565	0.00104464	0.889324	0.385598	0.100261	0.646394	0.503725	0.00250156	0.00287492	0.00281092	-0.000341357	-0.000373357	2.81274	2.85073	2.96645	-0.0958496	-0.153712
Hy204	SX7	FJ8	10.883	0.00648518	0.00572842	0.00277089	0.00223552	0.000756756	0.641305	0.279394	0.102845	0.450185	0.361911	0.00860272	0.0074852	0.00793129	0.000894476	0.000671433	3.12854	3.38903	3.32558	-0.228763	-0.260487
Hy205	SX5	FJ9	10.908	0.00640022	0.00173233	0.00207978	0.00449416	0.00432044	0.735172	0.0522548	0.0651663	0.676461	0.670005	0.0075656	0.0076334	0.00733551	8.1141e-05	-6.7801e-05	3.3664	2.87802	2.90134	0.476717	0.465058
Hy206	SX6	FJ5	11.012	0.00634919	0.00329227	0.00210614	0.00364999	0.00305692	0.869644	0.102947	0.0552636	0.790538	0.766697	0.00752352	0.00837531	0.00694401	-0.000136139	-0.000851792	3.16676	3.55737	3.039	-0.131427	-0.390611
Hy207	HLJ1	JL5	1.558	0.00899876	0.00829344	0.00697105	0.00136651	0.000705317	1.83296	1.46964	1.17607	0.510101	0.363315	0.00318812	0.00296844	0.00280269	0.000302554	0.000219677	3.04451	2.95471	3.06	0.0371557	-0.0154876
Hy209	BJ15	HLJ1	2.661	0.00896886	0.00729029	0.00829344	0.001177	0.000675423	1.80443	1.21579	1.46964	0.461708	0.334785	0.00332049	0.00311088	0.00296844	0.000280831	0.000209612	3.34605	3.3416	2.95471	0.197889	0.00444708
Hy210	BJ14	JL5	2.724	0.00867107	0.00768117	0.00697105	0.00134495	0.000989894	1.5481	1.40984	1.17607	0.255146	0.138261	0.00333262	0.00314049	0.00280269	0.000361027	0.000192126	3.14776	3.21811	3.06	0.00870242	-0.0703498
Hy211	BJ8	JL5	2.703	0.00886641	0.00830369	0.00697105	0.00122903	0.000562713	1.71866	1.46492	1.17607	0.39817	0.253747	0.00363828	0.00373197	0.00280269	0.000370955	-9.3686e-05	3.18665	3.10126	3.06	0.106022	0.0853915
Hy212	BJ6	JL5	2.681	0.0086205	0.00622259	0.00697105	0.00202368	0.00164945	1.52278	0.731954	1.17607	0.568768	0.34671	0.0037313	0.00405723	0.00280269	0.000301345	-0.000325925	3.26986	3.21969	3.06	0.13001	0.0501649
Hy213	BJ22	JL5	2.768	0.00476295	0.0052944	0.00697105	-0.00136977	-0.0022081	0.36744	0.240252	1.17607	-0.340721	-0.80863	0.00393029	0.00409188	0.00280269	0.000483009	-0.000161588	3.42463	3.18097	3.06	0.30415	0.243667
Hy214	BJ24	JL5	2.618	0.00827361	0.00712488	0.00697105	0.00122564	0.00114872	1.75183	1.18276	1.17607	0.572412	0.569065	0.00306285	0.00341939	0.00280269	-4.81885e-05	-0.000356542	3.16461	3.19267	3.06	0.0382692	-0.0280671
Hy215	BJ15	JL5	2.589	0.00723107	0.00729029	0.00697105	0.000100404	-5.9214e-05	1.04294	1.21579	1.17607	-0.152988	-0.17285	0.00347424	0.00311088	0.00280269	0.000517456	0.00036336	3.44149	3.3416	3.06	0.240687	0.0998884
Hy217	BJ8	HLJ1	2.82	0.00905288	0.00830369	0.00829344	0.000754318	0.00074919	1.86593	1.46492	1.46964	0.398647	0.396285	0.00314801	0.00373197	0.00296844	-0.0002022	-0.000583964	3.13287	3.10126	2.95471	0.104879	0.0316054
Hy218	BJ8	BJ14	2.113	0.00867592	0.00830369	0.00768117	0.00068349	0.000372229	1.85849	1.46492	1.40984	0.421108	0.39357	0.00331148	0.00373197	0.00314049	-0.000124748	-0.000420487	3.20277	3.10126	3.21811	0.0430885	-0.0153332
Hy219	BJ14	BJ24	2.138	0.00835467	0.00768117	0.00712488	0.00095164	0.000673496	1.68751	1.40984	1.18276	0.391204	0.277666	0.00350595	0.00314049	0.00341939	0.000226004	8.6552e-05	3.35181	3.21811	3.19267	0.146425	0.133709
Hy220	BJ14	BJ15	2.201	0.00860468	0.00743347	0.00694049	0.0014177	0.00117121	2.42504	1.08237	1.13485	1.31643	1.29019	0.00810915	0.00738934	0.00792159	0.000453687	0.000187563	3.72173	3.04566	3.83544	0.281178	-0.113712
Hy221	BJ14	BJ16	2.115	0.0083564	0.00743347	0.00624025	0.00151955	0.000922934	2.28982	1.08237	1.46555	1.01586	0.824274	0.00911906	0.00738934	0.00793786	0.00145545	0.00118119	3.48067	3.04566	3.5892	0.163241	-0.108528
Hy222	BJ8	BJ22	2.385	0.0040218	0.00830369	0.0052944	-0.00277725	-0.00428189	0.212417	1.46492	0.240252	-0.640167	-1.2525	0.00448596	0.00373197	0.00409188	0.000574032	0.000394076	2.69599	3.10126	3.18097	-0.44512	-0.484972
Hy223	BJ8	BJ15	2.292	0.00855368	0.00830369	0.00729029	0.000756691	0.000249987	1.96211	1.46492	1.21579	0.621752	0.497191	0.00313557	0.00373197	0.00311088	-0.000285856	-0.000596401	3.29512	3.10126	3.3416	0.0736876	-0.0464803
Hy224	BJ8	BJ16	2.215	0.00851734	0.00839373	0.00624025	0.00120035	0.000123609	2.08723	1.67572	1.46555	0.516596	0.41151	0.00904528	0.00781888	0.00793786	0.00116691	0.00110742	3.36394	3.23759	3.5892	-0.0494538	-0.225261
Hy225	BJ6	BJ15	2.148	0.00838079	0.00622259	0.00729029	0.00162435	0.0010905	1.77944	0.731954	1.21579	0.805562	0.563641	0.00335327	0.00405723	0.00311088	-0.00023078	-0.000703954	3.35409	3.21969	3.3416	0.0734405	0.012487
Hy226	BJ15	BJ22	2.203	0.00291056	0.00729029	0.0052944	-0.00338178	-0.00437972	0.0871983	1.21579	0.240252	-0.640825	-1.1286	0.00480983	0.00311088	0.00409188	0.00120845	0.000717946	2.87712	3.3416	3.18097	-0.384161	-0.464477
Hy227	BJ16	BJ24	1.602	0.00807949	0.00693221	0.00712488	0.00105094	0.000954608	1.63815	1.4464	1.18276	0.323571	0.191754	0.00321672	0.00286385	0.00341939	7.5096e-05	-0.000202676	3.32658	3.07226	3.19267	0.19411	0.133904
Hy230	BJ16	JL5	2.644	0.00802899	0.00693221	0.00697105	0.00107735	0.00105794	1.77629	1.4464	1.17607	0.465057	0.329893	0.00304171	0.00286385	0.00280269	0.000208439	0.000177857	3.06302	3.07226	3.06	-0.00311262	-0.00924328
Hy232	BJ6	BJ8	2.244	0.0084247	0.00622259	0.00830369	0.00116156	0.000121005	1.80062	0.731954	1.46492	0.702185	0.335704	0.00316034	0.00405723	0.00373197	-0.000734258	-0.000896886	3.07122	3.21969	3.10126	-0.0892555	-0.14847
Hy234	BJ6	BJ22	2.349	0.0041016	0.00622259	0.0052944	-0.0016569	-0.002121	0.249874	0.731954	0.240252	-0.236229	-0.48208	0.00580549	0.00405723	0.00409188	0.00173093	0.0017136	3.59024	3.21969	3.18097	0.389916	0.370553
Hy235	BJ6	BJ24	2.209	0.00794649	0.00622259	0.00712488	0.00127275	0.000821607	1.64859	0.731954	1.18276	0.691229	0.465824	0.00329047	0.00405723	0.00341939	-0.00044784	-0.000766756	3.22715	3.21969	3.19267	0.0209665	0.00745783
Hy236	BJ21	BJ27	2.04	0.00850946	0.00716254	0.00747545	0.00119046	0.00103401	1.70016	1.65687	1.49514	0.124161	0.043295	0.00359014	0.00291935	0.00335332	0.000453807	0.00023682	3.2374	3.06478	3.06707	0.171476	0.170329
Hy237	BJ19	BJ21	2.148	0.00813877	0.00654426	0.00716254	0.00128536	0.000976227	1.43377	1.1198	1.65687	0.0454309	-0.223104	0.00380924	0.00294212	0.00291935	0.000878504	0.000867117	3.24366	3.11139	3.06478	0.155579	0.132273
Hy238	BJ17	BJ21	2.328	0.00880692	0.00790986	0.00716254	0.00127072	0.000897055	1.66988	1.62401	1.65687	0.0294419	0.0130145	0.00413178	0.0030785	0.00291935	0.00113286	0.00105328	3.22339	3.10019	3.06478	0.140909	0.123201
Hy239	BJ20	BJ21	2.446	0.0083766	0.00755116	0.00732473	0.000938653	0.000825434	2.02607	1.6101	2.06554	0.188244	-0.0394757	0.00871546	0.00790173	0.00771039	0.000909398	0.000813728	3.41359	3.51391	3.69502	-0.190874	-0.28143
Hy240	BJ18	BJ21	2.427	0.00848682	0.00823433	0.00716254	0.000788386	0.000252489	1.91257	1.37341	1.65687	0.397436	0.255705	0.00353521	0.00311137	0.00291935	0.000519856	0.000423844	3.20908	3.16236	3.06478	0.0955124	0.0467213
Hy241	BJ21	BJ23	2.407	0.00810489	0.00732473	0.00367895	0.00260305	0.000780164	1.68011	2.06554	0.0950574	0.599809	-0.385434	0.00818509	0.00771039	0.00902411	-0.000182161	-0.000839019	2.88022	3.69502	2.89694	-0.415754	-0.814793
Hy242	BJ19	BJ27	2.099	0.00855005	0.00676037	0.00757615	0.0013818	0.000973904	2.49246	1.14087	1.81677	1.01364	0.675691	0.00808397	0.00775278	0.00857839	-8.1622e-05	-0.000494426	2.9852	3.48917	3.44311	-0.480936	-0.503966
Hy243	BJ17	BJ27	2.163	0.00867171	0.00840044	0.00757615	0.000683412	0.000271267	2.52098	2.08097	1.81677	0.572112	0.440013	0.00808098	0.00799942	0.00857839	-0.000207926	-0.000497411	3.33415	3.54368	3.44311	-0.159246	-0.209531
Hy244	BJ18	BJ27	2.279	0.00757513	0.00823433	0.00747545	-0.000279756	-0.000659199	1.45579	1.37341	1.49514	0.0215143	-0.0393508	0.00425498	0.00311137	0.00335332	0.00102263	0.000901659	2.91444	3.16236	3.06707	-0.20028	-0.247923
Hy245	BJ20	BJ27	2.313	0.00805956	0.00755116	0.00757615	0.000495906	0.000483413	2.17815	1.6101	1.81677	0.46471	0.361378	0.00756658	0.00790173	0.00857839	-0.000673485	-0.00101181	3.44577	3.51391	3.44311	-0.0327382	-0.0681358
Hy246	BJ20	BJ26	1.946	0.00841645	0.00801761	0.00794423	0.000435529	0.000398838	2.37372	1.65701	1.45227	0.819072	0.716701	0.00749957	0.0077383	0.00799681	-0.000367977	-0.000497233	3.30968	3.46542	3.62229	-0.234174	-0.312609
Hy247	BJ21	BJ26	2.405	0.008653	0.00732473	0.00771261	0.00113433	0.000940388	2.13794	2.06554	1.44948	0.38043	0.0724003	0.00770119	0.00771039	0.00755052	7.07365e-05	-9.201e-06	3.62405	3.69502	3.75931	-0.103115	-0.135262
Hy248	BJ26	BJ27	2.207	0.00865941	0.00771261	0.00757615	0.00101503	0.0009468	2.09037	1.44948	1.81677	0.457246	0.273603	0.00798802	0.00755052	0.00857839	-7.6434e-05	-0.00059037	3.44096	3.75931	3.44311	-0.160252	-0.318353
Hy249	BJ21	HLJ1	2.705	0.00917679	0.00732473	0.00826014	0.00138435	0.000916649	1.99901	2.06554	1.72618	0.103148	-0.0665362	0.00804916	0.00771039	0.00852966	-7.0864e-05	-0.000480496	3.40837	3.69502	3.03942	0.0411545	-0.286643
Hy250	BJ14	BJ21	2.2	0.00861835	0.00743347	0.00732473	0.00123925	0.00118488	2.17369	1.08237	2.06554	0.599731	0.108147	0.00791238	0.00738934	0.00771039	0.00036251	0.000201983	3.52341	3.04566	3.69502	0.153071	-0.171607
Hy251	BJ8	BJ21	2.305	0.00851618	0.00871994	0.00772315	0.000294635	-0.000203762	2.45646	1.77124	2.49258	0.32455	-0.0361216	0.00775106	0.00782557	0.00848075	-0.000402102	-0.000729689	3.31002	3.29038	3.63986	-0.155097	-0.329834
Hy252	BJ6	BJ21	2.19	0.0085526	0.00633895	0.00732473	0.00172076	0.00122788	2.21845	0.689415	2.06554	0.840974	0.15291	0.00740504	0.00750893	0.00771039	-0.000204622	-0.000305354	3.64893	3.5897	3.69502	0.00656955	-0.0460882
Hy253	BJ21	BJ22	2.265	0.00509303	0.0080493	0.00674407	-0.00230366	-0.00295627	0.217008	2.3408	0.337055	-1.12192	-2.12379	0.00859107	0.00848075	0.00797567	0.000362865	0.000110325	3.38862	3.63986	3.29035	-0.0764778	-0.251233
Hy254	BJ21	BJ24	2.244	0.0084631	0.00772315	0.00744604	0.000878499	0.000739945	2.4446	2.49258	1.36515	0.515732	-0.0479841	0.00790483	0.00848075	0.00811544	-0.000393262	-0.000575917	3.50712	3.63986	3.52971	-0.0776603	-0.132733
Hy255	BJ15	BJ21	2.072	0.00907757	0.00694049	0.00732473	0.00194496	0.00175284	2.24675	1.13485	2.06554	0.646554	0.181205	0.00742174	0.00792159	0.00771039	-0.000394251	-0.000499849	3.6939	3.83544	3.69502	-0.0713257	-0.141537
Hy256	BJ27	JL5	2.782	0.00840444	0.00771481	0.00750862	0.000792717	0.000689622	2.04369	2.16989	1.42735	0.245071	-0.126197	0.00778419	0.00830374	0.00795798	-0.000346669	-0.000519547	3.42366	3.36336	3.14383	0.170064	0.0603019
Hy257	BJ8	BJ27	2.297	0.00842061	0.00871994	0.00771481	0.000203228	-0.000299337	2.41859	1.77124	2.16989	0.448026	0.248702	0.00893384	0.00782557	0.00830374	0.000869181	0.0006301	3.34851	3.29038	3.36336	0.0216362	-0.0148517
Hy258	BJ6	BJ27	2.318	0.00643874	0.00633895	0.00757615	-0.000518811	-0.00113741	2.18103	0.689415	1.81677	0.927933	0.364256	0.00665511	0.00750893	0.00857839	-0.00138855	-0.00192328	3.47569	3.5897	3.44311	-0.040714	-0.114009
Hy259	BJ15	BJ27	2.27	0.0085769	0.007242	0.00771481	0.00109849	0.000862086	2.27851	1.40178	2.16989	0.492675	0.108623	0.00814599	0.00834712	0.00830374	-0.00017944	-0.000201132	3.56373	3.74779	3.36336	0.00816005	-0.184057
Hy260	BJ16	BJ21	2.143	0.00855048	0.00748776	0.00772315	0.000945025	0.000827331	2.22421	2.08996	2.49258	-0.0670593	-0.268372	0.00797709	0.00794477	0.00848075	-0.000235669	-0.000503659	3.46419	3.62488	3.63986	-0.168177	-0.175664
Hy261	BJ16	BJ27	2.375	0.00814319	0.00624025	0.00757615	0.00123499	0.000567039	2.38488	1.46555	1.81677	0.743724	0.568115	0.00762927	0.00793786	0.00857839	-0.00062886	-0.000949124	3.6414	3.5892	3.44311	0.125246	0.0522008
Hy262	BJ27	HLJ1	2.788	0.00871474	0.00771481	0.00868223	0.000516214	3.2504e-05	2.4227	2.16989	2.45471	0.110397	-0.0320147	0.0081175	0.00830374	0.00797434	-2.15365e-05	-0.000186237	3.44356	3.36336	3.30075	0.111499	0.0801978
Hy263	BJ19	HLJ1	2.72	0.00892541	0.00669341	0.00868223	0.00123759	0.000243177	2.3463	1.20477	2.45471	0.516561	-0.10841	0.00806244	0.00857578	0.00797434	-0.000212614	-0.000513337	3.4998	3.58076	3.30075	0.0590418	-0.0809628
Hy264	BJ19	JL5	2.79	0.00870472	0.00669341	0.00750862	0.0016037	0.0011961	2.24181	1.20477	1.42735	0.92575	0.814458	0.00765236	0.00857578	0.00795798	-0.000614518	-0.000923418	3.62589	3.58076	3.14383	0.263591	0.0451268
Hy265	BJ14	BJ19	2.266	0.0089628	0.00836844	0.00669341	0.00143187	0.000594356	2.42287	1.857	1.20477	0.891988	0.565871	0.00791776	0.00859364	0.00857578	-0.000666951	-0.00067588	3.49843	3.40075	3.58076	0.00767572	-0.0823287
Hy266	BJ8	BJ19	2.325	0.00911302	0.00871994	0.00669341	0.00140635	0.00039308	2.38835	1.77124	1.20477	0.900344	0.617108	0.00780399	0.00782557	0.00857578	-0.000396691	-0.000771795	3.42928	3.29038	3.58076	-0.00629668	-0.151488
Hy267	BJ19	BJ24	2.272	0.00853705	0.00669341	0.00744604	0.00146732	0.00109101	2.08258	1.20477	1.36515	0.797617	0.717426	0.00807608	0.00857578	0.00811544	-0.00026953	-0.000499703	3.56574	3.58076	3.52971	0.0105024	-0.0150239
Hy269	BJ17	HLJ1	2.824	0.00894286	0.00840044	0.00826014	0.00061257	0.000542419	2.48748	2.08097	1.72618	0.583909	0.406513	0.00851487	0.00799942	0.00852966	0.000250334	-1.4784e-05	3.29258	3.54368	3.03942	0.00103044	-0.251099
Hy270	BJ17	JL5	2.859	0.0086802	0.00816865	0.00750862	0.000841561	0.00051155	1.96182	2.3114	1.42735	0.092447	-0.349578	0.00793911	0.00822317	0.00795798	-0.000151463	-0.000284059	3.38791	3.61257	3.14383	0.00971171	-0.224657
Hy271	BJ6	BJ17	2.435	0.00847184	0.00652414	0.00816865	0.00112545	0.000303194	2.24108	0.796248	2.3114	0.687253	-0.0703241	0.00802376	0.00793006	0.00822317	-5.2854e-05	-0.000199412	3.55618	3.48052	3.61257	0.00963024	-0.0563941
Hy272	BJ17	BJ24	2.311	0.00859782	0.00816865	0.00744604	0.000790477	0.000429175	2.4563	2.3114	1.36515	0.618027	0.144902	0.00844057	0.00822317	0.00811544	0.000271267	0.000217399	3.55604	3.61257	3.52971	-0.0150971	-0.0565271
Hy273	BJ15	BJ17	2.325	0.00889195	0.007242	0.00816865	0.00118663	0.000723308	2.54161	1.40178	2.3114	0.685021	0.230212	0.00831486	0.00834712	0.00822317	2.9715e-05	-3.2259e-05	3.62061	3.74779	3.61257	-0.0595731	-0.127183
Hy274	BJ16	BJ19	2.253	0.00673803	0.00748776	0.00669341	-0.000352553	-0.000749728	2.10087	2.08996	1.20477	0.453508	0.0109137	0.00708157	0.00794477	0.00857578	-0.0011787	-0.00149421	3.62015	3.62488	3.58076	0.0173221	-0.00473775
Hy275	BJ18	HLJ1	2.866	0.00890886	0.00840558	0.00826014	0.000575998	0.000503278	2.46581	2.12214	1.72618	0.541651	0.343671	0.00881222	0.00750547	0.00852966	0.000794657	0.000282561	3.30032	3.64615	3.03942	-0.0424687	-0.345833
Hy276	BJ26	HLJ1	3.02	0.00865195	0.00794423	0.00868223	0.000338716	-3.0286e-05	2.20886	1.45227	2.45471	0.255365	-0.245854	0.00805101	0.00799681	0.00797434	6.5436e-05	5.42e-05	3.15449	3.62229	3.30075	-0.307027	-0.467795
Hy277	BJ20	HLJ1	2.937	0.00870479	0.00755116	0.00826014	0.000799139	0.000444653	2.28154	1.6101	1.72618	0.613403	0.555367	0.00767938	0.00790173	0.00852966	-0.000536316	-0.000850278	3.48995	3.51391	3.03942	0.21329	-0.0239512
Hy278	BJ23	HLJ1	3.116	0.00855728	0.00367895	0.00826014	0.00258774	0.000297144	2.19826	0.0950574	1.72618	1.28764	0.472082	0.00744407	0.00902411	0.00852966	-0.00133281	-0.00158004	3.26792	2.89694	3.03942	0.299742	0.2285
Hy279	BJ18	JL5	2.834	0.00871783	0.00832414	0.00750862	0.000801446	0.000393689	2.19412	2.12023	1.42735	0.420328	0.0738904	0.00766948	0.00800516	0.00795798	-0.000312092	-0.00033568	3.44264	3.57484	3.14383	0.0832998	-0.132202
Hy280	BJ26	JL5	2.949	0.00854283	0.00794423	0.00750862	0.000816399	0.000598596	2.09986	1.45227	1.42735	0.660043	0.647583	0.0076614	0.00799681	0.00795798	-0.000315996	-0.000335409	3.48281	3.62229	3.14383	0.0997497	-0.139478
Hy281	BJ20	JL5	3.162	0.00698961	0.00801761	0.00750862	-0.000773509	-0.001028	0.67981	1.65701	1.42735	-0.862374	-0.977205	0.00765818	0.0077383	0.00795798	-0.000189954	-0.000299797	2.99826	3.46542	3.14383	-0.306371	-0.467163
Hy282	BJ14	BJ26	2.519	0.0088716	0.00836844	0.00794423	0.000715268	0.000503162	2.31729	1.857	1.45227	0.662655	0.46029	0.00839408	0.00859364	0.00799681	9.88565e-05	-0.000199559	3.31258	3.40075	3.62229	-0.198941	-0.309708
Hy283	BJ14	BJ20	2.831	0.00858695	0.00836844	0.00801761	0.000393926	0.00021851	2.27704	1.857	1.65701	0.520029	0.420036	0.00725314	0.00859364	0.0077383	-0.000912829	-0.0013405	3.01287	3.40075	3.46542	-0.420219	-0.452551
Hy284	BJ14	BJ23	2.613	0.0082371	0.00836844	0.00426992	0.00191792	-0.000131337	2.03128	1.857	0.108471	1.04854	0.174276	0.00744782	0.00859364	0.0084194	-0.00105869	-0.00114581	3.09699	3.40075	2.3963	0.198459	-0.303769
Hy285	BJ8	BJ18	2.434	0.00872397	0.00839373	0.00840558	0.000324312	0.000318388	2.50931	1.67572	2.12214	0.610383	0.387178	0.00811839	0.00781888	0.00750547	0.000456217	0.000299508	3.72584	3.23759	3.64615	0.28397	0.0796876
Hy286	BJ8	BJ26	2.633	0.00903663	0.00871994	0.00794423	0.000704542	0.000316685	2.46561	1.77124	1.45227	0.853858	0.694375	0.00808105	0.00782557	0.00799681	0.00016986	8.4243e-05	3.55857	3.29038	3.62229	0.10224	-0.0637139
Hy287	BJ8	BJ20	2.763	0.00891345	0.00871994	0.00801761	0.000544676	0.000193509	2.24784	1.77124	1.65701	0.533709	0.476597	0.00811285	0.00782557	0.0077383	0.000330913	0.000287274	3.49128	3.29038	3.46542	0.113383	0.0258643
Hy288	BJ6	BJ26	2.441	0.00861439	0.00652414	0.00794423	0.0013802	0.000670161	2.44665	0.796248	1.45227	1.32239	0.994374	0.00866413	0.00793006	0.00799681	0.000700696	0.00066732	3.66409	3.48052	3.62229	0.112689	0.0418059
Hy289	BJ6	BJ20	2.745	0.00849883	0.00652414	0.00801761	0.00122795	0.000481218	2.26005	0.796248	1.65701	1.03341	0.603031	0.0078907	0.00793006	0.0077383	5.65205e-05	-3.936e-05	3.5098	3.48052	3.46542	0.0368263	0.0292749
Hy290	BJ18	BJ22	2.512	0.00512351	0.00832414	0.00572256	-0.00189984	-0.00320063	0.6999	2.12023	0.282791	-0.501609	-1.42033	0.00793599	0.00800516	0.00797567	-5.4425e-05	-6.917e-05	3.49308	3.57484	3.29035	0.0604872	-0.0817584
Hy291	BJ18	BJ24	2.274	0.00861184	0.00840558	0.00706308	0.000877514	0.000206266	2.31239	2.12214	1.26617	0.618241	0.190256	0.0078496	0.00750547	0.00766006	0.000266835	0.000189536	3.68214	3.64615	3.52791	0.0951079	0.0359863
Hy292	BJ24	BJ26	2.44	0.00896065	0.00744604	0.00794423	0.00126552	0.00101642	2.11442	1.36515	1.45227	0.705706	0.662145	0.00853536	0.00811544	0.00799681	0.000479237	0.000419922	3.55305	3.52971	3.62229	-0.022948	-0.069237
Hy293	BJ20	BJ24	2.749	0.00898377	0.00801761	0.00744604	0.00125194	0.000966156	2.12166	1.65701	1.36515	0.61058	0.464648	0.00886397	0.0077383	0.00811544	0.000937104	0.000748534	3.47867	3.46542	3.52971	-0.0188944	-0.0510402
Hy294	BJ15	BJ26	2.485	0.00898916	0.00694049	0.00771261	0.00166261	0.00127655	2.16868	1.13485	1.44948	0.876514	0.719195	0.0089596	0.00792159	0.00755052	0.00122354	0.00103801	3.66015	3.83544	3.75931	-0.137221	-0.175286
Hy295	BJ15	BJ20	2.72	0.00910648	0.007242	0.00801761	0.00147668	0.00108887	2.45142	1.40178	1.65701	0.922019	0.794404	0.00896619	0.00834712	0.0077383	0.000923483	0.000619071	3.64348	3.74779	3.46542	0.0368738	-0.104312
Hy296	BJ15	BJ23	2.573	0.00847046	0.007242	0.00426992	0.0027145	0.00122846	1.96579	1.40178	0.108471	1.21066	0.564006	0.00760146	0.00834712	0.0084194	-0.000781797	-0.000817936	3.22198	3.74779	2.3963	0.149939	-0.525808
Hy297	BJ24	HLJ1	2.775	0.00874271	0.00744604	0.00868223	0.000678571	6.0475e-05	2.13444	1.36515	2.45471	0.224505	-0.320275	0.00835858	0.00811544	0.00797434	0.000313692	0.000243141	3.47618	3.52971	3.30075	0.0609498	-0.0535286
Hy298	BJ16	HLJ1	2.781	0.00878449	0.00624025	0.00826014	0.0015343	0.000524358	2.42568	1.46555	1.72618	0.829821	0.699509	0.00814756	0.00793786	0.00852966	-8.62045e-05	-0.000382102	3.55724	3.5892	3.03942	0.242925	-0.0319646
Hy300	BJ21	JL5	2.716	0.0086015	0.00732473	0.00395798	0.00296015	0.00127678	2.19506	2.06554	0.11856	1.103	0.129513	0.00783588	0.00771039	0.00737434	0.00029351	0.000125484	3.72862	3.69502	3.03296	0.36463	0.0336036
Hy301	BJ6	BJ14	2.112	0.00803805	0.00633895	0.00743347	0.00115184	0.000604576	2.64802	0.689415	1.08237	1.76212	1.56564	0.00799879	0.00750893	0.00738934	0.000549652	0.000489857	3.8497	3.5897	3.04566	0.532017	0.259997
Hy302	BJ14	BJ22	2.45	0.00516751	0.00836844	0.00572256	-0.00187799	-0.00320093	0.352295	1.857	0.282791	-0.717602	-1.50471	0.00872279	0.00859364	0.00797567	0.000438139	0.000129154	3.19733	3.40075	3.29035	-0.148215	-0.203419
Hy303	BJ14	BJ17	2.586	0.00888913	0.00743347	0.00840044	0.000972172	0.000488687	2.43961	1.08237	2.08097	0.857936	0.35864	0.00789451	0.00738934	0.00799942	0.000200134	-0.000104907	3.78018	3.04566	3.54368	0.485507	0.236497
Hy304	BJ14	BJ18	2.507	0.00886655	0.00836844	0.00832414	0.00052026	0.000498108	2.2331	1.857	2.12023	0.244486	0.112873	0.00778176	0.00859364	0.00800516	-0.000517635	-0.000811875	3.60844	3.40075	3.57484	0.12064	0.0335987
Hy305	BJ8	BJ24	2.274	0.00895386	0.00871994	0.00744604	0.000870869	0.000233918	2.20404	1.77124	1.36515	0.635843	0.432799	0.0079688	0.00782557	0.00811544	-1.7055e-06	-0.000146637	3.64629	3.29038	3.52971	0.236245	0.116581
Hy306	BJ8	BJ17	2.435	0.00863832	0.0084653	0.00822103	0.000295153	0.00017302	2.19757	1.36115	2.18558	0.4242	0.0119855	0.00793943	0.00777323	0.00836768	-0.000131018	-0.000428243	3.41487	3.31956	3.34319	0.0835	0.0716853
Hy307	BJ6	BJ24	2.209	0.00821535	0.00628874	0.0073792	0.00138138	0.000836158	2.03963	0.676014	1.16191	1.12066	0.877716	0.00825316	0.00790028	0.00830906	0.000148491	-5.5902e-05	3.54813	3.49047	3.47846	0.063663	0.0576602
Hy308	BJ6	BJ16	2.182	0.0080479	0.00628874	0.00726632	0.00127037	0.000781586	1.96752	0.676014	1.94398	0.657524	0.0235403	0.00781738	0.00790028	0.00767259	3.095e-05	-8.2894e-05	3.17844	3.49047	3.50181	-0.317696	-0.323365
Hy309	BJ16	BJ22	2.239	0.00653565	0.00726632	0.00518269	0.000311151	-0.000730665	1.03592	1.94398	0.241341	-0.0567367	-0.908056	0.00818839	0.00767259	0.0079352	0.000384494	0.000253191	3.70828	3.50181	3.29661	0.309075	0.206476
Hy310	BJ19	BJ22	2.332	0.00280235	0.00675448	0.00518269	-0.00316623	-0.00395213	0.0836114	1.24266	0.241341	-0.658388	-1.15905	0.00806412	0.00818274	0.0079352	5.1475e-06	-0.000118625	3.03271	3.67008	3.29661	-0.450636	-0.637371
Hy311	BJ17	BJ22	2.331	0.00417876	0.00822103	0.00518269	-0.0025231	-0.00404227	0.276322	2.18558	0.241341	-0.937141	-1.90926	0.00850684	0.00836768	0.0079352	0.000355404	0.000139163	2.74054	3.34319	3.29661	-0.579359	-0.602648
Hy312	BJ18	BJ26	2.333	0.00871891	0.00861403	0.00801167	0.000406054	0.000104874	2.16319	1.98233	1.28012	0.531967	0.180865	0.0080315	0.0082651	0.00816752	-0.000184808	-0.0002336	3.42605	3.46393	3.48238	-0.047101	-0.0563222
Hy313	BJ18	BJ19	2.239	0.008409	0.00861403	0.00675448	0.000724749	-0.000205029	2.2478	1.98233	1.24266	0.635308	0.265474	0.00779567	0.0082651	0.00818274	-0.000428257	-0.000469437	3.49525	3.46393	3.67008	-0.0717603	-0.174833
Hy314	BJ19	BJ26	2.376	0.00843751	0.00675448	0.00801167	0.00105443	0.000425832	1.93764	1.24266	1.28012	0.676249	0.657517	0.00811593	0.00818274	0.00816752	-5.9203e-05	-6.6814e-05	3.55279	3.67008	3.48238	-0.023441	-0.117292
Hy315	BJ16	BJ26	2.542	0.00823753	0.00726632	0.00801167	0.000598536	0.000225858	2.21842	1.94398	1.28012	0.606365	0.274436	0.00746564	0.00767259	0.00816752	-0.000454419	-0.000701883	3.40564	3.50181	3.48238	-0.0864486	-0.0961635
Hy316	BJ17	BJ18	1.588	0.00832716	0.00822103	0.00861403	-9.03735e-05	-0.000286875	2.27755	2.18558	1.98233	0.193592	0.0919629	0.00746564	0.00836768	0.0082651	-0.000850754	-0.000902042	3.40564	3.34319	3.46393	0.0020816	-0.0582914
Hy317	BJ17	BJ26	2.266	0.00848788	0.00822103	0.00801167	0.00037153	0.000266851	2.26296	2.18558	1.28012	0.530103	0.077372	0.00762446	0.00836768	0.00816752	-0.000643135	-0.000743214	3.57469	3.34319	3.48238	0.161906	0.0923119
Hy318	BJ17	BJ20	2.108	0.00854137	0.00822103	0.0079532	0.000454251	0.000320335	2.22921	2.18558	1.51884	0.376997	0.043627	0.00801376	0.00836768	0.00798856	-0.000164362	-0.00035392	3.37391	3.34319	3.39672	0.00396278	-0.0228019
Hy319	SX2	HLJ1	7.837	0.00821219	0.00247957	0.00834827	0.00279827	-0.000136081	1.94575	0.0711574	2.36212	0.72911	-0.41637	0.00731802	0.00785433	0.00760125	-0.000409764	-0.000536306	3.11137	2.93834	3.29755	-0.00657793	-0.186183
Hy320	SX3	HLJ1	7.889	0.00780451	0.00247219	0.00834827	0.00239428	-0.000543763	1.63191	0.058222	2.36212	0.421745	-0.730203	0.00829689	0.00844804	0.00760125	0.000272247	-0.000151149	3.20617	3.24647	3.29755	-0.0658435	-0.0913823
Hy321	SX4	HLJ1	7.932	0.0082725	0.00460424	0.00834827	0.00179625	-7.5771e-05	1.89379	0.251004	2.36212	0.587226	-0.468331	0.0084084	0.00803571	0.00760125	0.00058992	0.000372686	3.37237	3.28531	3.29755	0.0809438	0.0748222
Hy322	SX5	HLJ1	7.937	0.00854409	0.00200009	0.00834827	0.00336991	0.000195815	2.30835	0.0423568	2.36212	1.10612	-0.0537643	0.00783833	0.00864265	0.00760125	-0.000283623	-0.000804327	3.29161	2.70693	3.29755	0.289375	-0.00593657
Hy323	SX3	JL5	7.926	0.00760404	0.00247219	0.00776768	0.0024841	-0.000163644	1.44098	0.058222	1.45571	0.684016	-0.0147264	0.00816695	0.00844804	0.00759374	0.000146054	-0.000281094	3.21231	3.24647	3.38555	-0.103709	-0.17325
Hy324	SX4	JL5	7.989	0.0083828	0.00460424	0.00776768	0.00219684	0.000615116	1.99932	0.251004	1.45571	1.14596	0.543613	0.00794611	0.00803571	0.00759374	0.000131383	-8.9602e-05	3.40865	3.28531	3.38555	0.0732156	0.0230921
Hy325	SX5	JL5	7.933	0.00816393	0.00200009	0.00776768	0.00328005	0.000396249	1.9216	0.0423568	1.45571	1.17257	0.465894	0.00793709	0.00864265	0.00759374	-0.000181107	-0.000705561	3.39922	2.70693	3.38555	0.352982	0.0136686
Hy326	SX2	BJ14	7.946	0.00822368	0.00247957	0.00800028	0.00298376	0.000223398	2.07796	0.0711574	1.7726	1.15608	0.305359	0.00772242	0.00785433	0.00768679	-4.81355e-05	-0.000131907	3.30031	2.93834	3.51961	0.0713353	-0.219299
Hy327	SX3	BJ14	7.99	0.00822473	0.00247219	0.00800028	0.00298849	0.000224444	1.74364	0.058222	1.7726	0.828228	-0.0289593	0.00740903	0.00844804	0.00768679	-0.000658387	-0.00103901	3.2558	3.24647	3.51961	-0.12724	-0.263807
Hy328	SX4	BJ14	8.022	0.00820557	0.00460424	0.00800028	0.00190331	0.000205288	2.06427	0.251004	1.7726	1.05247	0.291676	0.00760326	0.00803571	0.00768679	-0.000257991	-0.000432454	3.45953	3.28531	3.51961	0.0570696	-0.0600806
Hy329	SX5	BJ14	7.997	0.0082118	0.00200009	0.00800028	0.00321162	0.000211519	2.54556	0.0423568	1.7726	1.63808	0.772963	0.00835774	0.00864265	0.00768679	0.000193018	-0.000284915	3.4964	2.70693	3.51961	0.383131	-0.023209
Hy330	SX2	BJ8	7.811	0.00841569	0.00247957	0.0084653	0.00294325	-4.9611e-05	2.18241	0.0711574	1.36115	1.46625	0.821254	0.00834129	0.00785433	0.00777323	0.000527515	0.000486963	3.26816	2.93834	3.31956	0.139211	-0.0513976
Hy331	SX3	BJ8	7.917	0.00836997	0.00247219	0.0084653	0.00290123	-9.5325e-05	1.71016	0.058222	1.36115	1.00048	0.349009	0.00746145	0.00844804	0.00777323	-0.000649187	-0.000986592	3.27761	3.24647	3.31956	-0.00540513	-0.0419472
Hy332	SX4	BJ8	7.862	0.00835883	0.00460424	0.0084653	0.00182406	-0.000106469	1.88635	0.251004	1.36115	1.08027	0.525196	0.00778871	0.00803571	0.00777323	-0.000115758	-0.000247001	3.37402	3.28531	3.31956	0.0715866	0.0544616
Hy333	SX5	BJ8	7.891	0.00862318	0.00200009	0.0084653	0.00339049	0.000157883	2.01491	0.0423568	1.36115	1.31315	0.653756	0.00805713	0.00864265	0.00777323	-0.000150807	-0.000585519	3.35407	2.70693	3.31956	0.34083	0.0345151
Hy334	SX4	BJ15	7.879	0.00846735	0.00460424	0.00734508	0.00249269	0.00112227	1.961	0.251004	1.34784	1.16158	0.613162	0.00847414	0.00803571	0.00889096	1.0805e-05	-0.000416817	3.70815	3.28531	3.59076	0.270112	0.117386
Hy335	SX3	BJ6	7.956	0.00761764	0.00247219	0.00628874	0.00323717	0.00132889	1.5197	0.058222	0.676014	1.15258	0.843686	0.00789886	0.00844804	0.00790028	-0.000275297	-0.000549178	3.29802	3.24647	3.49047	-0.0704461	-0.192443
Hy336	SX5	BJ6	7.973	0.00804104	0.00200009	0.00628874	0.00389663	0.0017523	2.30822	0.0423568	0.676014	1.94903	1.6322	0.00814615	0.00864265	0.00790028	-0.000125321	-0.000496508	3.50647	2.70693	3.49047	0.407769	0.0159996
Hy337	SX4	BJ22	7.994	0.00290189	0.00460424	0.00518269	-0.00199158	-0.0022808	0.0594715	0.251004	0.241341	-0.186701	-0.191533	0.00901223	0.00803571	0.0079352	0.00102678	0.00097652	3.11809	3.28531	3.29661	-0.172864	-0.178514
Hy338	SX3	BJ22	7.949	0.000638659	0.00247219	0.00518269	-0.00318878	-0.00454403	0.0223545	0.058222	0.241341	-0.127427	-0.218987	0.00824024	0.00844804	0.0079352	4.86265e-05	-0.000207795	2.94796	3.24647	3.29661	-0.323582	-0.348649
Hy339	SX3	BJ24	7.904	0.00762469	0.00247219	0.0073792	0.00269899	0.000245494	1.3684	0.058222	1.16191	0.758337	0.206491	0.00798742	0.00844804	0.00830906	-0.000391128	-0.000460615	3.50644	3.24647	3.47846	0.143973	0.0279786
Hy340	SX5	BJ24	7.937	0.00785852	0.00200009	0.0073792	0.00316888	0.000479325	2.00189	0.0423568	1.16191	1.39976	0.839982	0.00809667	0.00864265	0.00830906	-0.000379192	-0.000545987	3.27205	2.70693	3.47846	0.179358	-0.206408
Hy341	SX4	BJ21	7.811	0.00842031	0.00460424	0.00763681	0.00229979	0.000783503	1.82361	0.251004	2.60067	0.397772	-0.777063	0.00805534	0.00803571	0.00878648	-0.000355756	-0.000731141	3.42956	3.28531	3.4991	0.0373564	-0.0695397
Hy342	SX5	BJ21	7.857	0.00823985	0.00200009	0.00763681	0.0034214	0.000603042	2.13154	0.0423568	2.60067	0.810028	-0.469131	0.00774539	0.00864265	0.00878648	-0.000969177	-0.00104109	3.46627	2.70693	3.4991	0.363257	-0.0328285
Hy343	SX5	BJ27	7.854	0.00809755	0.00200009	0.00750866	0.00334318	0.000588892	2.1282	0.0423568	1.96644	1.1238	0.161756	0.00759695	0.00864265	0.00839521	-0.000921979	-0.0010457	3.35615	2.70693	3.47115	0.267112	-0.115
Hy344	SX3	BJ17	7.819	0.0078677	0.00247219	0.00822103	0.00252109	-0.000353328	1.8258	0.058222	2.18558	0.703899	-0.359782	0.00762195	0.00844804	0.00836768	-0.000785911	-0.000826092	3.26768	3.24647	3.34319	-0.0271531	-0.0755099
Hy345	SX5	BJ17	7.796	0.00836937	0.00200009	0.00822103	0.00325881	0.000148337	2.28756	0.0423568	2.18558	1.17359	0.101979	0.00811492	0.00864265	0.00836768	-0.000390243	-0.000527731	3.28785	2.70693	3.34319	0.262794	-0.0553352
Hy346	SX2	BJ6	7.905	0.0061333	0.00247957	0.00628874	0.00174915	-0.000155442	0.724234	0.0711574	0.676014	0.350648	0.0482192	0.0080611	0.00785433	0.00790028	0.000183793	0.000160819	3.48324	2.93834	3.49047	0.26884	-0.00722332
Hy347	SX4	BJ6	7.964	0.0081063	0.00460424	0.00628874	0.00265981	0.00181755	2.011	0.251004	0.676014	1.54749	1.33498	0.00772078	0.00803571	0.00790028	-0.000247214	-0.000314932	3.41959	3.28531	3.49047	0.0316991	-0.0708805
Hy348	SX5	BJ19	7.845	0.0079776	0.00200009	0.00675448	0.00360032	0.00122312	2.0092	0.0423568	1.24266	1.3667	0.766546	0.00848099	0.00864265	0.00818274	6.8291e-05	-0.000161665	3.46554	2.70693	3.67008	0.277041	-0.204534
Hy349	SX2	BJ24	7.876	0.00753794	0.00247957	0.0073792	0.00260856	0.000158741	1.64693	0.0711574	1.16191	1.0304	0.485019	0.00869645	0.00785433	0.00830906	0.000614755	0.000387389	3.30792	2.93834	3.47846	0.0995213	-0.170539
Hy350	SX4	BJ24	7.969	0.0079252	0.00460424	0.0073792	0.00193348	0.000546002	1.75761	0.251004	1.16191	1.05115	0.595696	0.00782689	0.00803571	0.00830906	-0.000345497	-0.000482172	3.48086	3.28531	3.47846	0.0989721	0.00239528
Hy351	SX2	BJ18	7.737	0.00840149	0.00247957	0.00861403	0.00285469	-0.000212546	2.36104	0.0711574	1.98233	1.3343	0.378716	0.00770691	0.00785433	0.0082651	-0.000352811	-0.000558197	3.1646	2.93834	3.46393	-0.0365329	-0.299329
Hy352	SX4	BJ18	7.839	0.00856933	0.00460424	0.00861403	0.00196019	-4.4706e-05	1.94765	0.251004	1.98233	0.830984	-0.0346767	0.00802309	0.00803571	0.0082651	-0.000127321	-0.000242015	3.53978	3.28531	3.46393	0.165159	0.0758467
Hy353	SX5	BJ18	7.823	0.00805444	0.00200009	0.00861403	0.00274738	-0.00055959	2.46129	0.0423568	1.98233	1.44895	0.478968	0.00765382	0.00864265	0.0082651	-0.000800061	-0.000988837	3.64318	2.70693	3.46393	0.557746	0.179243
Hy354	SX3	BJ26	7.886	0.00839516	0.00247219	0.00801167	0.00315323	0.000383486	1.72093	0.058222	1.28012	1.05176	0.44081	0.00773882	0.00844804	0.00816752	-0.00056896	-0.00070922	3.41733	3.24647	3.48238	0.0529009	-0.06505
Hy355	SX4	BJ26	7.934	0.00825876	0.00460424	0.00801167	0.0019508	0.000247087	1.88458	0.251004	1.28012	1.11902	0.60446	0.007892	0.00803571	0.00816752	-0.000209615	-0.000275517	3.65885	3.28531	3.48238	0.275012	0.176478
Hy356	SX5	BJ26	7.921	0.00846544	0.00200009	0.00801167	0.00345956	0.000453764	2.23749	0.0423568	1.28012	1.57626	0.957372	0.00757985	0.00864265	0.00816752	-0.000825234	-0.0010628	3.54176	2.70693	3.48238	0.447105	0.0593814
Hy357	SX2	BJ20	7.894	0.00825699	0.00247957	0.0079532	0.00304061	0.00030379	2.06929	0.0711574	1.51884	1.27429	0.550448	0.00693362	0.00785433	0.00798856	-0.00098783	-0.00105495	3.23006	2.93834	3.39672	0.0625295	-0.166659
Hy358	SX3	BJ20	7.943	0.00824086	0.00247219	0.0079532	0.00302816	0.000287657	1.92233	0.058222	1.51884	1.1338	0.403491	0.00793301	0.00844804	0.00798856	-0.000285288	-0.000515026	3.35235	3.24647	3.39672	0.0307527	-0.0443687
Hy359	SX4	BJ20	7.95	0.0086255	0.00400537	0.0080342	0.00260572	0.000591305	2.14634	0.135724	1.49185	1.33255	0.65449	0.00875084	0.00840164	0.0086295	0.000235268	0.000121342	3.52758	3.39923	3.51035	0.0727902	0.0172298
Hy360	SX2	BJ23	7.917	0.00765961	0.00273078	0.00439644	0.00409601	0.00326318	1.64657	0.0665672	0.0604876	1.58304	1.58	0.00834937	0.00837364	0.0106924	-0.00118365	-0.00234303	2.8387	3.20038	2.64402	-0.0834928	-0.361672
Hy361	SX4	BJ23	7.976	0.00739594	0.00400537	0.00439644	0.00319504	0.00299951	1.58485	0.135724	0.0604876	1.48674	1.44912	0.00811886	0.00840164	0.0106924	-0.00142816	-0.00257354	3.35145	3.39923	2.64402	0.329829	-0.0477757
Hy362	SX5	BJ23	7.984	0.00824908	0.00205965	0.00382283	0.00530785	0.00442625	1.94369	0.0376994	0.111075	1.86931	1.83262	0.00760368	0.00888831	0.00918899	-0.00143497	-0.00158531	3.34707	2.92764	2.90343	0.431529	0.419425
Hy363	SX5	BJ16	7.885	0.00835126	0.00205965	0.00674588	0.0039485	0.00160538	2.55126	0.0376994	1.39457	1.83513	1.1567	0.00758842	0.00888831	0.00823176	-0.000971616	-0.00129989	3.69385	2.92764	3.60606	0.427001	0.0877897
Hy364	SX2	BJ15	7.777	0.00845308	0.00284729	0.00705634	0.00350127	0.00139674	2.35785	0.0955773	1.32597	1.64707	1.03188	0.00779112	0.00767166	0.00772734	9.16185e-05	6.3776e-05	3.46048	3.15766	3.82507	-0.030888	-0.364596
Hy365	SX5	BJ15	7.871	0.00853079	0.00205965	0.00705634	0.00397279	0.00147444	2.64131	0.0376994	1.32597	1.95948	1.31534	0.00774889	0.00888831	0.00772734	-0.000558941	-0.00113942	3.61275	2.92764	3.82507	0.236393	-0.212323
Hy366	SX3	BJ19	7.858	0.008015	0.00302799	0.00665595	0.00317303	0.00135904	1.49244	0.11869	1.19093	0.837637	0.301519	0.00771979	0.00808953	0.00762681	-0.000138382	-0.000369739	3.41764	3.44699	3.66783	-0.13977	-0.250189
Hy367	SX2	BJ27	7.74	0.0083318	0.00284729	0.00766115	0.00307758	0.00067065	2.02412	0.0955773	1.8097	1.07149	0.214425	0.00782543	0.00767166	0.00806499	-4.2892e-05	-0.000239557	3.35066	3.15766	3.45879	0.0424388	-0.108127
Hy368	SX3	BJ27	7.856	0.00819983	0.00302799	0.00766115	0.00285526	0.000538683	1.61332	0.11869	1.8097	0.649122	-0.196382	0.007838	0.00808953	0.00806499	-0.000239259	-0.000251527	3.47576	3.44699	3.45879	0.0228665	0.0169686
Hy369	SX4	BJ27	7.795	0.00833364	0.0041522	0.00766115	0.00242697	0.000672498	1.91095	0.225647	1.8097	0.893275	0.10125	0.00794837	0.00763011	0.00806499	0.000100822	-0.000116617	3.51746	3.37584	3.45879	0.10014	0.0586682
Hy370	SX3	BJ16	7.852	0.00823394	0.00302799	0.00674588	0.00334701	0.00148806	2.00096	0.11869	1.39457	1.24433	0.606393	0.00781381	0.00808953	0.00823176	-0.000346832	-0.000417949	3.44258	3.44699	3.60606	-0.0839451	-0.163482
Hy371	SX4	BJ16	7.916	0.00845109	0.0041522	0.00674588	0.00300205	0.00170521	1.93857	0.225647	1.39457	1.12846	0.544004	0.00779804	0.00763011	0.00823176	-0.000132894	-0.000433718	3.6542	3.37584	3.60606	0.163241	0.0481313
Hy372	SX3	BJ18	7.855	0.00829504	0.00302799	0.00839732	0.00258238	-0.000102285	1.92735	0.11869	2.09146	0.822279	-0.164106	0.00715804	0.00808953	0.00803255	-0.000903	-0.00093149	3.4676	3.44699	3.74698	-0.129387	-0.279383
Hy373	SX2	BJ17	7.692	0.0083585	0.00284729	0.00809557	0.00288707	0.000262929	2.15179	0.0955773	2.25954	0.974229	-0.107753	0.00777352	0.00767166	0.00785438	1.0502e-05	-8.0857e-05	3.11091	3.15766	3.74606	-0.340949	-0.635149
Hy374	SX4	BJ17	7.797	0.00843747	0.0041522	0.00809557	0.00231358	0.000341894	2.17808	0.225647	2.25954	0.935487	-0.0814602	0.00789618	0.00763011	0.00785438	0.000153937	4.1804e-05	3.32385	3.37584	3.74606	-0.237102	-0.422208
Hy375	SX6	JL5	8.127	0.0082219	0.00342737	0.00376078	0.00462783	0.00446112	2.14609	0.0922724	0.12123	2.03933	2.02486	0.0079589	0.00894045	0.00731411	-0.000168377	-0.000981552	3.40761	3.49026	3.39305	-0.0340448	-0.0826519
Hy376	SX7	HLJ1	7.708	0.00869561	0.0054293	0.00784683	0.00205754	0.000848775	2.31273	0.253939	1.73393	1.31879	0.578794	0.00755003	0.00800987	0.00786064	-0.000385233	-0.000459849	3.36681	3.55797	3.61098	-0.217662	-0.244165
Hy377	SX7	JL5	7.737	0.00833657	0.0054293	0.00376078	0.00374153	0.00290727	1.9655	0.253939	0.12123	1.77792	1.71156	0.00748755	0.00800987	0.00731411	-0.000174444	-0.000522329	3.38752	3.55797	3.39305	-0.0879882	-0.17045
Hy378	SX7	BJ6	7.723	0.00837109	0.0054293	0.00597116	0.00267086	0.00239993	2.20167	0.253939	0.645542	1.75193	1.55613	0.00794796	0.00800987	0.00792369	-1.8824e-05	-6.1915e-05	3.22988	3.55797	3.79753	-0.447875	-0.567655
Hy379	SX7	BJ15	7.62	0.0089523	0.0054293	0.00705634	0.00270948	0.00189596	2.00851	0.253939	1.32597	1.21855	0.682538	0.00856377	0.00800987	0.00772734	0.000695162	0.000553897	3.25625	3.55797	3.82507	-0.435271	-0.568822
Hy380	SX6	BJ16	8.049	0.00845156	0.00342737	0.00674588	0.00336493	0.00170568	1.78841	0.0922724	1.39457	1.04499	0.393845	0.00921061	0.00894045	0.00823176	0.000624502	0.000270153	3.15362	3.49026	3.60606	-0.394541	-0.452443
Hy381	SX7	BJ16	7.653	0.00646115	0.0054293	0.00674588	0.000373558	-0.000284733	1.22903	0.253939	1.39457	0.404782	-0.165531	0.00829418	0.00800987	0.00823176	0.00017336	6.2419e-05	3.21027	3.55797	3.60606	-0.371748	-0.395795
Hy382	SX6	HLJ1	7.946	0.00852145	0.00342737	0.00784683	0.00288435	0.000674619	1.93906	0.0922724	1.73393	1.02596	0.205133	0.00796547	0.00894045	0.00786064	-0.00043508	-0.000974986	3.38861	3.49026	3.61098	-0.162014	-0.222371
Hy383	SX6	BJ14	8.154	0.00858884	0.00342737	0.00684403	0.00345314	0.00174481	1.67212	0.0922724	0.709787	1.27109	0.96233	0.0081711	0.00894045	0.00776512	-0.000181686	-0.000769354	3.40766	3.49026	3.38597	-0.0304603	-0.0826049
Hy384	SX6	BJ6	8.08	0.00821985	0.00342737	0.00597116	0.00352058	0.00224869	1.73431	0.0922724	0.645542	1.3654	1.08877	0.00809419	0.00894045	0.00792369	-0.000337888	-0.000846269	3.60136	3.49026	3.79753	-0.042537	-0.196172
Hy385	SX6	BJ24	8.108	0.00791541	0.00342737	0.00450849	0.00394747	0.00340691	1.73994	0.0922724	0.162551	1.61253	1.57739	0.00774648	0.00894045	0.00780741	-0.000627451	-0.00119397	3.52261	3.49026	3.73987	-0.092456	-0.217263
Hy386	SX6	BJ21	7.929	0.00851996	0.00342737	0.00756323	0.00302465	0.000956723	2.05923	0.0922724	1.90926	1.05846	0.149967	0.0079275	0.00894045	0.00824228	-0.000663865	-0.00101295	3.49652	3.49026	3.7666	-0.131904	-0.270072
Hy387	SX6	BJ17	7.917	0.00837655	0.00342737	0.00809557	0.00261507	0.000280971	2.14799	0.0922724	2.25954	0.97208	-0.111555	0.0078006	0.00894045	0.00785438	-0.000596816	-0.00113985	3.34163	3.49026	3.74606	-0.276527	-0.404424
Hy388	SX6	BJ20	7.94	0.00847042	0.00342737	0.00715643	0.00317852	0.00131398	1.89613	0.0922724	1.4225	1.13875	0.473631	0.00800179	0.00894045	0.00774211	-0.000339494	-0.000938668	3.25154	3.49026	3.65049	-0.318832	-0.398947
Hy389	SX6	BJ15	8.018	0.00870193	0.00342737	0.00705634	0.00346007	0.00164559	1.96262	0.0922724	1.32597	1.2535	0.636653	0.00831538	0.00894045	0.00772734	-1.85155e-05	-0.000625071	3.2888	3.49026	3.82507	-0.368869	-0.536274
Hy390	SX6	BJ18	7.975	0.00852027	0.00342737	0.00839732	0.00260792	0.000122945	2.11921	0.0922724	2.09146	1.02734	0.0277511	0.00829511	0.00894045	0.00803255	-0.000191392	-0.000645347	3.51336	3.49026	3.74698	-0.105266	-0.233626
Hy391	SX6	BJ26	8.072	0.00836417	0.00342737	0.00683912	0.00323092	0.00152505	2.03554	0.0922724	1.21186	1.38347	0.823674	0.0078459	0.00894045	0.00833013	-0.000789396	-0.00109456	3.71001	3.49026	3.6585	0.135629	0.0515081
Hy392	SX6	BJ23	8.104	0.00800073	0.00342737	0.00382283	0.00437563	0.0041779	1.92002	0.0922724	0.111075	1.81834	1.80894	0.00729721	0.00894045	0.00918899	-0.00176752	-0.00189178	3.3464	3.49026	2.90343	0.14955	-0.143865
Hy393	SX7	BJ14	7.746	0.00853804	0.0054293	0.00684403	0.00240138	0.00169402	2.23171	0.253939	0.709787	1.74984	1.52192	0.00779788	0.00800987	0.00776512	-8.9618e-05	-0.000211996	3.35728	3.55797	3.38597	-0.11469	-0.20069
Hy394	SX7	BJ8	7.614	0.0087049	0.0054293	0.00842404	0.00177823	0.000280856	1.95505	0.253939	1.48992	1.08311	0.465124	0.0079979	0.00800987	0.00838603	-0.00020005	-0.000388127	3.27666	3.55797	3.49099	-0.247818	-0.281307
Hy395	SX7	BJ24	7.717	0.00835121	0.0054293	0.00450849	0.00338231	0.00292191	1.80844	0.253939	0.162551	1.6002	1.5545	0.00789156	0.00800987	0.00780741	-1.70855e-05	-0.000118318	3.35426	3.55797	3.73987	-0.294658	-0.38561
Hy396	SX7	BJ21	7.564	0.00861565	0.0054293	0.00756323	0.00211938	0.00105242	2.30603	0.253939	1.90926	1.22443	0.39677	0.00765243	0.00800987	0.00824228	-0.000473649	-0.000589851	3.49376	3.55797	3.7666	-0.16852	-0.272833
Hy397	SX7	BJ19	7.56	0.00833678	0.0054293	0.00665595	0.00229415	0.00168083	2.25334	0.253939	1.19093	1.53091	1.06242	0.00773503	0.00800987	0.00762681	-8.33185e-05	-0.00027485	3.34289	3.55797	3.66783	-0.270006	-0.324935
Hy398	SX7	BJ26	7.641	0.00859874	0.0054293	0.00683912	0.00246453	0.00175962	2.33357	0.253939	1.21186	1.60066	1.1217	0.00773587	0.00800987	0.00833013	-0.000434128	-0.000594255	3.6854	3.55797	3.6585	0.0771678	0.0269016
Hy399	SX7	BJ20	7.72	0.00870258	0.0054293	0.00715643	0.00240971	0.00154615	2.27547	0.253939	1.4225	1.43725	0.852972	0.00735127	0.00800987	0.00774211	-0.000524718	-0.000658602	3.62313	3.55797	3.65049	0.0188954	-0.0273642
Hy400	SX7	BJ27	7.546	0.00872141	0.0054293	0.00766115	0.00217619	0.00106027	1.99555	0.253939	1.8097	0.963735	0.185855	0.00781022	0.00800987	0.00806499	-0.000227211	-0.000254768	3.39408	3.55797	3.45879	-0.114303	-0.163895
Hy401	SX7	BJ27	7.546	0.00863136	0.0054293	0.00766115	0.00208614	0.000970215	1.93546	0.253939	1.8097	0.903645	0.125766	0.00781133	0.00800987	0.00806499	-0.000226102	-0.000253659	3.36068	3.55797	3.45879	-0.147696	-0.197288
Hy402	HN1	HLJ1	10.483	0.00830249	0.00224429	0.00784683	0.00325693	0.000455663	1.9294	0.0907022	1.73393	1.01708	0.195469	0.00784582	0.00808985	0.00786064	-0.000129427	-0.00024403	3.79749	3.66724	3.61098	0.158381	0.130248
Hy403	HN2	HLJ1	10.41	0.00811374	0.0033603	0.00784683	0.00251018	0.000266911	1.93451	0.0946901	1.73393	1.0202	0.20058	0.00842036	0.00857496	0.00786064	0.000202557	-0.000154603	3.76414	3.62012	3.61098	0.148593	0.14402
Hy404	HN2	JL5	10.389	0.00545902	0.0033603	0.00376078	0.00189848	0.00169824	1.57524	0.0946901	0.12123	1.46728	1.45401	0.00683689	0.00857496	0.00731411	-0.00110764	-0.00173807	3.44793	3.62012	3.39305	-0.0586562	-0.172194
Hy405	HN2	BJ6	10.356	0.00754854	0.0033603	0.00597116	0.00288281	0.00157738	1.87006	0.0946901	0.645542	1.49995	1.22452	0.00792097	0.00857496	0.00792369	-0.000328356	-0.000653991	3.75408	3.62012	3.79753	0.0452537	-0.0434506
Hy406	HN3	BJ8	10.4	0.00808662	0.00236396	0.00842404	0.00269262	-0.000337424	2.02384	0.0321753	1.48992	1.2628	0.533923	0.00760278	0.00904237	0.00838603	-0.00111142	-0.00143959	3.65207	3.37069	3.49099	0.221228	0.161076
Hy407	HN2	BJ27	10.266	0.00801125	0.0033603	0.00766115	0.00250053	0.000350107	1.94423	0.0946901	1.8097	0.992034	0.13453	0.00798378	0.00857496	0.00806499	-0.000336192	-0.000591179	3.59874	3.62012	3.45879	0.0592822	-0.0213855
Hy408	HN1	BJ21	10.482	0.00840085	0.00224429	0.00756323	0.00349708	0.000837613	1.97335	0.0907022	1.90926	0.973371	0.06409	0.00795729	0.00808985	0.00824228	-0.000208775	-0.000284989	3.72584	3.66724	3.7666	0.00892181	-0.040755
Hy409	HN1	BJ26	10.564	0.00800867	0.00224429	0.00683912	0.00346696	0.00116955	1.64078	0.0907022	1.21186	0.989494	0.428913	0.00786177	0.00808985	0.00833013	-0.000348221	-0.00046836	3.74817	3.66724	3.6585	0.0852999	0.0809301
Hy410	HN1	BJ23	10.556	0.00782556	0.00224429	0.00382283	0.004792	0.00400273	1.44804	0.0907022	0.111075	1.34715	1.33697	0.00739985	0.00808985	0.00918899	-0.00123957	-0.00178914	3.35539	3.66724	2.90343	0.0700499	-0.311855
Hy411	HN2	BJ21	10.308	0.00783658	0.00332442	0.00746534	0.0024417	0.000371246	2.22213	0.116408	2.12484	1.1015	0.0972841	0.00809739	0.00859536	0.00798059	-0.000190587	-0.000497968	3.93666	3.77817	3.63782	0.228662	0.158487
Hy412	HN2	BJ20	10.365	0.00797427	0.00332442	0.00744836	0.00258788	0.000525913	1.69202	0.116408	1.6845	0.791562	0.0075139	0.00863707	0.00859536	0.00821682	0.000230982	4.1714e-05	3.7399	3.77817	3.27682	0.212407	-0.0382707
Hy413	HN2	BJ26	10.351	0.00790819	0.00332442	0.00733462	0.00257867	0.000573567	1.60121	0.116408	1.43006	0.827975	0.171147	0.0079555	0.00859536	0.008248	-0.00046618	-0.000639858	3.73418	3.77817	3.52468	0.082754	-0.0439941
Hy414	HN2	BJ23	10.339	0.00771387	0.00332442	0.00401795	0.00404268	0.00369592	1.78054	0.116408	0.116301	1.66418	1.66413	0.00719737	0.00859536	0.00903865	-0.00161963	-0.00184128	3.34054	3.77817	2.73255	0.0851803	-0.43763
Hy415	HN3	BJ21	10.371	0.00804582	0.00229721	0.00746534	0.00316455	0.000580487	2.44415	0.0497406	2.12484	1.35686	0.319309	0.00788106	0.00875272	0.00798059	-0.000485596	-0.000871658	3.84137	3.31275	3.63782	0.366084	0.203547
Hy416	HN3	BJ27	10.338	0.00806164	0.00229721	0.00750239	0.00316184	0.000559255	2.25027	0.0497406	1.99921	1.22579	0.251058	0.00775529	0.00875272	0.0079448	-0.000593471	-0.000997427	3.56909	3.31275	3.4023	0.211567	0.166791
Hy417	HN3	BJ26	10.43	0.00783471	0.00229721	0.00733462	0.0030188	0.00050009	1.66707	0.0497406	1.43006	0.927169	0.237007	0.0078317	0.00875272	0.008248	-0.000668657	-0.000921016	3.80805	3.31275	3.52468	0.389333	0.283369
Hy418	HN3	BJ23	10.434	0.00506173	0.00270732	0.00354679	0.00193468	0.00151494	0.357582	0.0599718	0.0392153	0.307989	0.297611	0.0079437	0.00875272	0.00903865	-0.000951981	-0.00109495	3.82305	3.31275	2.73255	0.800394	0.510296
Hy419	HN5	BJ21	10.29	0.00792548	0.00228091	0.00746534	0.00305236	0.000460146	1.97779	0.0713262	2.12484	0.879701	-0.147058	0.00785669	0.0084316	0.00798059	-0.000349408	-0.000574913	3.75797	3.77661	3.63782	0.0507551	-0.0186382
Hy420	HN5	BJ27	10.331	0.00805636	0.00228091	0.00750239	0.00316471	0.000553968	1.93524	0.0713262	1.99921	0.899973	-0.0639673	0.00815125	0.0084316	0.0079448	-3.69525e-05	-0.000280351	3.29661	3.77661	3.4023	-0.29285	-0.480004
Hy421	HN5	BJ17	10.324	0.00821421	0.00228091	0.00831164	0.00291794	-9.7422e-05	1.88635	0.0713262	2.51294	0.594218	-0.62659	0.00922628	0.0084316	0.00777017	0.00112539	0.000794675	3.3065	3.77661	3.61808	-0.390841	-0.470107
Hy422	HN5	BJ18	10.397	0.00831844	0.00228091	0.00832948	0.00301325	-1.1039e-05	1.60945	0.0713262	2.33687	0.405348	-0.727424	0.00883453	0.0084316	0.00802566	0.000605902	0.00040293	3.23213	3.77661	3.59769	-0.455016	-0.544476
Hy423	HN5	BJ20	10.368	0.00820824	0.00228091	0.00744836	0.0033436	0.000759876	1.51956	0.0713262	1.6845	0.641643	-0.164946	0.00867839	0.0084316	0.00821682	0.000354184	0.000246792	3.50935	3.77661	3.27682	-0.0173617	-0.267258
Hy424	HN5	BJ26	10.385	0.00797377	0.00228091	0.00733462	0.003166	0.00063915	1.26434	0.0713262	1.43006	0.513644	-0.165725	0.00860947	0.0084316	0.008248	0.000269668	0.000177866	3.63121	3.77661	3.52468	-0.0194358	-0.145402
Hy425	HN5	BJ23	10.389	0.00774564	0.00228091	0.00401795	0.0045962	0.00372768	1.05003	0.0713262	0.116301	0.956214	0.933727	0.00821714	0.0084316	0.00903865	-0.000517985	-0.000821507	3.13169	3.77661	2.73255	-0.122894	-0.644922
Hy426	HN1	BJ17	10.425	0.00815168	0.00216309	0.00831164	0.00291432	-0.000159958	2.16069	0.0556834	2.51294	0.876375	-0.352254	0.00827423	0.00812254	0.00777017	0.000327874	0.000151692	3.75693	3.47291	3.61808	0.211439	0.138856
Hy427	HN1	BJ18	10.521	0.00829096	0.00207666	0.00840558	0.00304984	-0.000114619	1.74675	0.0850091	2.12214	0.643182	-0.375381	0.00881614	0.00824991	0.00750547	0.000938455	0.000566232	3.26917	3.39184	3.64615	-0.249828	-0.376983
Hy428	FJ8	BJ19	10.409	0.00798644	0.00303923	0.00676037	0.00308664	0.00122607	1.97212	0.103314	1.14087	1.35002	0.831243	0.00772819	0.00806699	0.00775278	-0.000181694	-0.000338796	3.40619	3.24658	3.48917	0.0383123	-0.0829829
Hy429	FJ8	BJ27	10.37	0.00826595	0.00303923	0.00757615	0.00295826	0.000689802	2.23995	0.103314	1.81677	1.27991	0.423181	0.00743281	0.00806699	0.00857839	-0.000889875	-0.00114558	3.44655	3.24658	3.44311	0.10171	0.00344447
Hy430	FJ8	BJ17	10.333	0.00828985	0.00303923	0.00840044	0.00257001	-0.00011059	2.19282	0.103314	2.08097	1.10068	0.11185	0.00773269	0.00806699	0.00799942	-0.000300519	-0.000334301	3.61234	3.24658	3.54368	0.217209	0.0686588
Hy431	FJ8	BJ18	10.409	0.00837571	0.00303923	0.00840558	0.00265331	-2.9866e-05	2.09697	0.103314	2.12214	0.984244	-0.025166	0.00801163	0.00806699	0.00750547	0.000225403	-5.5358e-05	3.44671	3.24658	3.64615	0.000339356	-0.199446
Hy432	FJ8	BJ20	10.396	0.0080834	0.00303923	0.00755116	0.00278821	0.000532239	1.68755	0.103314	1.6101	0.830839	0.0774448	0.0080977	0.00806699	0.00790173	0.000113336	3.071e-05	3.45679	3.24658	3.51391	0.0765461	-0.0571166
Hy433	FJ8	BJ26	10.394	0.00814444	0.00303923	0.00771261	0.00276852	0.000431833	1.58907	0.103314	1.44948	0.812667	0.139583	0.00871546	0.00806699	0.00755052	0.000906709	0.000648475	3.41359	3.24658	3.75931	-0.0893585	-0.345724
Hy434	FJ8	BJ23	10.386	0.0082285	0.00303923	0.00367895	0.00486941	0.00454955	1.6464	0.103314	0.0950574	1.54722	1.54309	0.00746595	0.00806699	0.00902411	-0.0010796	-0.00155816	3.106	3.24658	2.89694	0.0342401	-0.14058
Hy435	FJ9	BJ21	10.264	0.008196	0.00236709	0.00732473	0.00335009	0.000871272	2.0206	0.0644354	2.06554	0.955608	-0.0449463	0.00793061	0.00775734	0.00771039	0.00019674	0.000173268	3.44829	2.70571	3.69502	0.247926	-0.246728
Hy436	FJ9	BJ27	10.316	0.00793488	0.00207978	0.00750239	0.0031438	0.000432489	1.93741	0.0651663	1.99921	0.905224	-0.0617962	0.00710883	0.00733551	0.0079448	-0.00053133	-0.000835975	3.1814	2.90134	3.4023	0.0295824	-0.220899
Hy437	FJ9	BJ17	10.271	0.00823874	0.00207978	0.00831164	0.00304303	-7.29e-05	1.85304	0.0651663	2.51294	0.563989	-0.659899	0.00785493	0.00733551	0.00777017	0.000302084	8.4755e-05	3.13561	2.90134	3.61808	-0.124104	-0.482473
Hy438	FJ9	BJ20	10.337	0.00811203	0.00207978	0.00744836	0.00334796	0.000663665	1.75833	0.0651663	1.6845	0.883496	0.073827	0.00788947	0.00733551	0.00821682	0.000113302	-0.00032735	3.10763	2.90134	3.27682	0.0185554	-0.169185
Hy439	FJ9	BJ26	10.347	0.00793544	0.00207978	0.00733462	0.00322824	0.000600816	1.68145	0.0651663	1.43006	0.933831	0.251382	0.00800854	0.00733551	0.008248	0.000216786	-0.000239456	3.11213	2.90134	3.52468	-0.10088	-0.412549
Hy440	FJ10	BJ19	10.368	0.00796754	0.00350315	0.00673212	0.00284991	0.00123542	2.25381	0.155365	1.25325	1.5495	1.00056	0.00843176	0.00734381	0.00768593	0.000916888	0.000745827	3.25639	3.62781	3.54827	-0.331645	-0.371417
Hy441	FJ10	BJ27	10.364	0.00820519	0.00350315	0.00750239	0.00270242	0.000702805	2.27047	0.155365	1.99921	1.19318	0.271262	0.00831157	0.00734381	0.0079448	0.00066726	0.000366761	3.27248	3.62781	3.4023	-0.24258	-0.355334
Hy442	FJ10	BJ17	10.315	0.00834119	0.00350315	0.00831164	0.00243379	2.9551e-05	2.49335	0.155365	2.51294	1.1592	-0.0195918	0.00824019	0.00734381	0.00777017	0.000683203	0.00047002	3.39878	3.62781	3.61808	-0.224166	-0.229032
Hy443	FJ10	BJ18	10.417	0.00829158	0.00350315	0.00832948	0.00237526	-3.7905e-05	2.06144	0.155365	2.33687	0.815327	-0.275426	0.00797349	0.00734381	0.00802566	0.000288759	-5.2168e-05	3.45386	3.62781	3.59769	-0.158892	-0.173952
Hy444	FJ10	BJ20	10.353	0.00851517	0.00350315	0.00744836	0.00303941	0.00106681	1.63061	0.155365	1.6845	0.710675	-0.0538939	0.00821118	0.00734381	0.00821682	0.000430868	-5.638e-06	3.34321	3.62781	3.27682	-0.109109	-0.284605
Hy445	FJ10	BJ26	10.397	0.00833115	0.00350315	0.00733462	0.00291227	0.000996532	1.5324	0.155365	1.43006	0.739681	0.102331	0.00857064	0.00734381	0.008248	0.00077474	0.000322643	3.41426	3.62781	3.52468	-0.161983	-0.21355
Hy447	HN6	BJ21	10.427	0.00837894	0.00173529	0.00772315	0.00364972	0.000655787	2.06819	0.0447946	2.49258	0.799503	-0.424391	0.00836221	0.00923966	0.00848075	-0.000497997	-0.000877453	3.63585	3.50924	3.63986	0.0613042	-0.00400592
Hy448	HN6	BJ19	10.509	0.00803371	0.00173529	0.00669341	0.00381936	0.0013403	1.97641	0.0447946	1.20477	1.35163	0.771641	0.00842679	0.00923966	0.00857578	-0.000480933	-0.000812872	3.58856	3.50924	3.58076	0.0435605	0.00779677
Hy449	HN6	BJ17	10.464	0.00127908	0.00173529	0.00816865	-0.003675	-0.00689	0.0167551	0.0447946	2.3114	-1.16134	-2.29465	0.00778386	0.00923966	0.00822317	-0.000947558	-0.0014558	3.41752	3.50924	3.61257	-0.143379	-0.195047
Hy450	HN7	BJ21	10.354	0.00811729	0.00355875	0.00772315	0.00247633	0.000394136	2.14954	0.1257	2.49258	0.840394	-0.343047	0.00772135	0.0092053	0.00848075	-0.00112167	-0.00148394	3.68615	3.49092	3.63986	0.120763	0.0462965
Hy451	HN7	BJ19	10.364	0.00808167	0.00355875	0.00669341	0.00295559	0.00138826	2.20227	0.1257	1.20477	1.53704	0.997504	0.00890655	0.0092053	0.00857578	1.6016e-05	-0.000298741	3.67827	3.49092	3.58076	0.142426	0.0975066
Hy452	HN7	BJ18	10.364	0.00835672	0.00355875	0.00832414	0.00241527	3.2577e-05	1.99081	0.1257	2.12023	0.867847	-0.129416	0.00823873	0.0092053	0.00800516	-0.000366501	-0.00096657	3.61487	3.49092	3.57484	0.0819864	0.04003
Hy453	FJ5	BJ21	10.363	0.0080069	0.00198368	0.00772315	0.00315349	0.000283755	2.15713	0.0572947	2.49258	0.882194	-0.33545	0.00827068	0.00757218	0.00848075	0.000244213	-0.00021007	3.44259	2.84426	3.63986	0.20053	-0.19727
Hy454	FJ5	BJ19	10.361	0.00801538	0.00198368	0.00669341	0.00367684	0.00132197	2.12396	0.0572947	1.20477	1.49293	0.91919	0.00758991	0.00757218	0.00857578	-0.000484067	-0.000985867	3.25917	2.84426	3.58076	0.0466645	-0.321589
Hy455	FJ5	BJ17	10.304	0.00847609	0.00198368	0.00816865	0.00339993	0.000307447	2.28024	0.0572947	2.3114	1.09589	-0.031162	0.00751353	0.00757218	0.00822317	-0.000384148	-0.000709643	3.28837	2.84426	3.61257	0.0599597	-0.324197
Hy456	FJ5	BJ20	10.417	0.00841058	0.00198368	0.00801761	0.00340993	0.000392966	1.84126	0.0572947	1.65701	0.984103	0.184243	0.00729417	0.00757218	0.0077383	-0.00036107	-0.000444126	3.21349	2.84426	3.46542	0.0586493	-0.251932
Hy457	FJ5	BJ26	10.426	0.00815784	0.00198368	0.00794423	0.00319388	0.000213606	1.54604	0.0572947	1.45227	0.791252	0.0937622	0.00745752	0.00757218	0.00799681	-0.000326975	-0.000539288	3.33052	2.84426	3.62229	0.0972491	-0.291767
Hy458	FJ5	BJ23	10.428	0.00819205	0.00198368	0.00426992	0.00506525	0.00392212	1.48849	0.0572947	0.108471	1.40561	1.38002	0.00738309	0.00757218	0.0084194	-0.000612702	-0.00103631	3.06918	2.84426	2.3963	0.448903	0.224924
Hy459	FJ7	BJ20	10.371	0.00844571	0.0035626	0.00801761	0.00265561	0.000428105	2.00039	0.155381	1.65701	1.09419	0.343376	0.0075576	0.00843712	0.0077383	-0.000530103	-0.000879513	3.65551	3.35245	3.46542	0.246572	0.190088
Hy460	FJ7	BJ26	10.392	0.00817925	0.0035626	0.00794423	0.00242583	0.000235018	1.90547	0.155381	1.45227	1.10164	0.453193	0.00828449	0.00843712	0.00799681	6.75285e-05	-0.000152626	3.46266	3.35245	3.62229	-0.0247126	-0.159631
Hy461	FJ7	BJ23	10.392	0.00822809	0.0035626	0.00426992	0.00431182	0.00395816	1.55982	0.155381	0.108471	1.4279	1.40444	0.0074201	0.00843712	0.0084194	-0.00100816	-0.00101702	3.07042	3.35245	2.3963	0.196044	-0.282033
Hy462	FJ7	BJ21	10.324	0.00817185	0.00311977	0.00741408	0.00290492	0.000757764	2.05146	0.103141	2.24148	0.879147	-0.190023	0.00827083	0.00824083	0.00800305	0.000148888	3.0001e-05	3.48377	3.18698	3.72317	0.0286996	-0.239397
Hy463	FJ7	BJ27	10.365	0.00872874	0.00311977	0.00794152	0.0031981	0.000787219	2.04896	0.103141	2.00931	0.992738	0.0396531	0.0083472	0.00824083	0.00794427	0.000254651	0.000106373	3.38072	3.18698	3.32353	0.125467	0.0571909
Hy464	HN6	BJ23	10.553	0.00803807	0.0012149	0.00418513	0.00533806	0.00385294	1.14234	0.0431559	0.100209	1.07066	1.04213	0.00786587	0.00314941	0.00938203	0.00160015	-0.00151616	2.92197	2.94363	2.58834	0.155986	-0.0216594
Hy465	HN7	BJ17	10.28	0.00776917	0.00326456	0.00817747	0.00204815	-0.000408301	2.27646	0.122287	2.30103	1.0648	-0.0245714	0.00801798	0.00865869	0.00789462	-0.000258674	-0.00064071	3.55708	3.34533	3.56593	0.101446	-0.00885351
Hy466	HN1	BJ14	10.645	0.00830956	0.00319205	0.00836844	0.00252931	-5.8885e-05	1.97318	0.141091	1.857	0.974131	0.116175	0.00814103	0.00827533	0.00859364	-0.000293454	-0.000452609	3.78646	3.54797	3.40075	0.312094	0.238487
Hy467	HN1	BJ8	10.521	0.00828065	0.00319205	0.00871994	0.00232465	-0.000439291	2.19145	0.141091	1.77124	1.23528	0.420209	0.008018	0.00827533	0.00782557	-3.245e-05	-0.000257327	3.66679	3.54797	3.29038	0.247618	0.118825
Hy468	HN1	BJ15	10.526	0.00838969	0.00319205	0.007242	0.00317266	0.00114769	2.46098	0.141091	1.40178	1.68954	1.0592	0.00801724	0.00827533	0.00834712	-0.000293978	-0.000329875	3.80198	3.54797	3.74779	0.154099	0.0541871
Hy469	HN2	BJ8	10.306	0.00806643	0.00385979	0.00871994	0.00177656	-0.000653515	2.08539	0.192598	1.77124	1.10348	0.314154	0.00793269	0.00836138	0.00782557	-0.000160783	-0.000428687	3.76795	3.69944	3.29038	0.273036	0.0685058
Hy470	HN2	BJ15	10.312	0.00826497	0.00385979	0.007242	0.00271407	0.00102296	2.30368	0.192598	1.40178	1.50649	0.901899	0.00826136	0.00836138	0.00834712	-9.2892e-05	-0.000100022	4.02277	3.69944	3.74779	0.299155	0.27498
Hy471	HN3	HLJ1	10.447	0.00839031	0.00286044	0.00868223	0.00261898	-0.00029192	2.26219	0.0853859	2.45471	0.992143	-0.192519	0.0077656	0.00915351	0.00797434	-0.000798322	-0.00138791	3.64316	3.62015	3.30075	0.182713	0.0230154
Hy472	HN3	BJ14	10.516	0.00829075	0.00286044	0.00836844	0.00267631	-7.7688e-05	2.1489	0.0853859	1.857	1.1777	0.291897	0.00746862	0.00915351	0.00859364	-0.00140495	-0.00168489	3.88018	3.62015	3.40075	0.369732	0.260035
Hy473	HN5	HLJ1	10.41	0.00799237	0.00252996	0.00868223	0.00238627	-0.000689867	1.85825	0.0844194	2.45471	0.588683	-0.596462	0.0080096	0.00882115	0.00797434	-0.000388136	-0.000811541	3.43812	3.43119	3.30075	0.0721438	0.00692489
Hy474	HN5	BJ14	10.469	0.00831371	0.00252996	0.00836844	0.00286451	-5.4729e-05	1.72299	0.0844194	1.857	0.752276	-0.134015	0.0081569	0.00882115	0.00859364	-0.000550492	-0.000664245	3.61459	3.43119	3.40075	0.198614	0.183396
Hy475	HN5	BJ8	10.408	0.00810397	0.00252996	0.00871994	0.00247901	-0.000615977	1.7476	0.0844194	1.77124	0.81977	-0.0236404	0.00790062	0.00882115	0.00782557	-0.000422736	-0.000920522	3.60779	3.43119	3.29038	0.247003	0.176598
Hy476	HN5	BJ24	10.389	0.00812154	0.00252996	0.00744604	0.00313353	0.000675495	1.71487	0.0844194	1.36515	0.990083	0.349717	0.00806915	0.00882115	0.00811544	-0.00039914	-0.000751995	3.79186	3.43119	3.52971	0.311413	0.262153
Hy477	HN5	BJ15	10.32	0.00805043	0.00252996	0.007242	0.00316445	0.00080843	2.18778	0.0844194	1.40178	1.44468	0.785996	0.00807927	0.00882115	0.00834712	-0.000504861	-0.000741873	3.76996	3.43119	3.74779	0.180468	0.0221685
Hy478	HN6	JL5	10.599	0.0079401	0.00173529	0.00750862	0.00331815	0.000431478	1.77037	0.0447946	1.42735	1.0343	0.343022	0.00781551	0.00923966	0.00795798	-0.000783309	-0.00142415	3.64164	3.50924	3.14383	0.315106	0.132405
Hy479	HN6	BJ8	10.574	0.0081657	0.00173529	0.00871994	0.00293808	-0.000554244	1.93415	0.0447946	1.77124	1.02614	0.162915	0.00813416	0.00923966	0.00782557	-0.00039846	-0.0011055	3.73014	3.50924	3.29038	0.330331	0.220904
Hy480	HN6	BJ6	10.541	0.00794369	0.00173529	0.00652414	0.00381397	0.00141955	1.94693	0.0447946	0.796248	1.52641	1.15069	0.00822344	0.00923966	0.00793006	-0.000361419	-0.00101622	3.81944	3.50924	3.48052	0.324565	0.310208
Hy481	HN7	BJ24	10.408	0.00797202	0.00355875	0.00744604	0.00246962	0.000525975	1.9486	0.1257	1.36515	1.20317	0.583447	0.0082774	0.0092053	0.00811544	-0.000382964	-0.000927893	3.83795	3.49092	3.52971	0.327633	0.308239
Hy482	HN7	BJ15	10.386	0.00846831	0.00355875	0.007242	0.00306793	0.0012263	2.38678	0.1257	1.40178	1.62303	0.984992	0.00825373	0.0092053	0.00834712	-0.000522479	-0.000951566	4.02656	3.49092	3.74779	0.407205	0.278771
Hy483	HN7	HLJ1	10.438	0.00824398	0.00355875	0.00868223	0.00212349	-0.000438251	2.01461	0.1257	2.45471	0.724402	-0.440103	0.00766842	0.0092053	0.00797434	-0.000921399	-0.00153688	3.78573	3.49092	3.30075	0.389889	0.294804
Hy484	HN7	BJ14	10.486	0.0086918	0.00355875	0.00836844	0.0027282	0.000323356	2.14289	0.1257	1.857	1.15154	0.285888	0.00847885	0.0092053	0.00859364	-0.000420613	-0.000726442	3.8167	3.49092	3.40075	0.370863	0.325779
Hy485	HN7	BJ8	10.367	0.00813477	0.00355875	0.00871994	0.00199542	-0.000585179	1.95953	0.1257	1.77124	1.01106	0.188294	0.0081823	0.0092053	0.00782557	-0.000333138	-0.001023	3.79615	3.49092	3.29038	0.405495	0.305224
Hy486	FJ5	HLJ1	10.456	0.00797968	0.00198368	0.00868223	0.00264673	-0.000702551	1.91535	0.0572947	2.45471	0.659343	-0.539365	0.00737433	0.00757218	0.00797434	-0.000398929	-0.000600005	3.43338	2.84426	3.30075	0.360874	0.132626
Hy487	FJ5	BJ14	10.505	0.00828955	0.00198368	0.00836844	0.00311349	-7.8892e-05	2.14293	0.0572947	1.857	1.18578	0.285927	0.00750208	0.00757218	0.00859364	-0.000580834	-0.00109156	3.56384	2.84426	3.40075	0.441333	0.163084
Hy488	FJ5	BJ8	10.384	0.00809818	0.00198368	0.00871994	0.00274637	-0.000621764	1.94656	0.0572947	1.77124	1.03229	0.175317	0.00780451	0.00757218	0.00782557	0.000105635	-2.1061e-05	3.40846	2.84426	3.29038	0.341144	0.118082
Hy489	FJ5	BJ24	10.408	0.0078003	0.00198368	0.00744604	0.00308544	0.000354259	1.62013	0.0572947	1.36515	0.908911	0.254983	0.00750927	0.00757218	0.00811544	-0.000334538	-0.000606165	3.72505	2.84426	3.52971	0.538064	0.195337
Hy490	FJ7	BJ24	10.377	0.00807217	0.0035626	0.00744604	0.00256784	0.000626125	1.9841	0.155381	1.36515	1.22384	0.618951	0.00780055	0.00843712	0.00811544	-0.000475721	-0.000636561	3.89143	3.35245	3.52971	0.450345	0.361715
Hy491	FJ7	BJ15	10.35	0.00857276	0.0035626	0.007242	0.00317046	0.00133076	2.37843	0.155381	1.40178	1.59985	0.976648	0.00789623	0.00843712	0.00834712	-0.000495887	-0.000540885	3.78005	3.35245	3.74779	0.229931	0.0322612
Hy492	FJ7	JL5	10.433	0.00847908	0.0035626	0.00750862	0.00294347	0.000970458	1.94606	0.155381	1.42735	1.15469	0.518707	0.00789258	0.00843712	0.00795798	-0.000304968	-0.000544536	3.62155	3.35245	3.14383	0.373403	0.269095
Hy493	FJ7	BJ14	10.464	0.00854389	0.0035626	0.00836844	0.00257837	0.000175449	1.97531	0.155381	1.857	0.96912	0.11831	0.00755042	0.00843712	0.00859364	-0.00096496	-0.00104322	3.66007	3.35245	3.40075	0.283468	0.259317
Hy494	FJ7	BJ8	10.407	0.00866978	0.0035626	0.00871994	0.00252851	-5.0165e-05	2.032	0.155381	1.77124	1.06869	0.260758	0.0076549	0.00843712	0.00782557	-0.000476448	-0.000782219	3.67381	3.35245	3.29038	0.352392	0.321357
Hy495	FJ8	HLJ1	10.43	0.00837399	0.00297161	0.00834827	0.00271404	2.5713e-05	1.8016	0.114963	2.36212	0.563062	-0.560516	0.00817052	0.00812803	0.00760125	0.000305881	4.249e-05	3.40632	3.27708	3.29755	0.11901	0.108774
Hy496	FJ8	JL5	10.412	0.0081587	0.00297161	0.00776768	0.00278906	0.000391021	1.97268	0.114963	1.45571	1.18735	0.516978	0.00840725	0.00812803	0.00759374	0.000546361	0.000279218	3.5876	3.27708	3.38555	0.256285	0.202047
Hy497	FJ8	BJ8	10.398	0.00837034	0.00297161	0.0084653	0.00265189	-9.4957e-05	1.77814	0.114963	1.36115	1.04008	0.416985	0.00847928	0.00812803	0.00777323	0.000528649	0.000351248	3.30399	3.27708	3.31956	0.00566973	-0.0155704
Hy498	FJ8	BJ22	10.425	0.00209259	0.00297161	0.00518269	-0.00198456	-0.00309009	0.0531855	0.114963	0.241341	-0.124966	-0.188156	0.00818997	0.00812803	0.0079352	0.000158354	6.1937e-05	2.89036	3.27708	3.29661	-0.396479	-0.406244
Hy499	FJ8	BJ24	10.361	0.0077861	0.00297161	0.0073792	0.0026107	0.000406905	1.74734	0.114963	1.16191	1.1089	0.585427	0.00772363	0.00812803	0.00830906	-0.000494915	-0.000585432	3.40764	3.27708	3.47846	0.0298745	-0.0708175
Hy500	FJ8	BJ15	10.348	0.00802723	0.00297161	0.00734508	0.00286889	0.000682155	2.16589	0.114963	1.34784	1.43449	0.818049	0.0078309	0.00812803	0.00889096	-0.000678595	-0.00106006	3.71684	3.27708	3.59076	0.28292	0.12608
Hy501	FJ9	HLJ1	10.37	0.00797048	0.00202062	0.00834827	0.00278604	-0.000377789	1.81983	0.0603717	2.36212	0.608583	-0.54229	0.00735199	0.00788351	0.00760125	-0.000390387	-0.000531519	3.36579	2.70323	3.29755	0.3654	0.0682376
Hy502	FJ9	JL5	10.39	0.00788772	0.00202062	0.00776768	0.00299357	0.00012004	1.99723	0.0603717	1.45571	1.2392	0.541528	0.00702725	0.00788351	0.00759374	-0.00071138	-0.000856263	3.42464	2.70323	3.38555	0.38025	0.0390854
Hy503	FJ9	BJ14	10.437	0.00849157	0.00202062	0.00800028	0.00348112	0.000491291	1.86536	0.0603717	1.7726	0.948874	0.0927611	0.00878197	0.00788351	0.00768679	0.000996817	0.000898456	3.36585	2.70323	3.51961	0.254434	-0.153758
Hy504	FJ9	BJ6	10.348	0.00783155	0.00202062	0.00628874	0.00367687	0.00154281	2.02727	0.0603717	0.676014	1.65907	1.35125	0.00826127	0.00788351	0.00790028	0.000369379	0.000360995	3.21522	2.70323	3.49047	0.118377	-0.275244
Hy505	FJ10	HLJ1	10.401	0.00827132	0.00351052	0.00834827	0.00234192	-7.6956e-05	2.03324	0.14918	2.36212	0.777588	-0.328881	0.00861274	0.00828442	0.00760125	0.000669905	0.00032832	3.29364	3.35418	3.29755	-0.032226	-0.0605396
Hy506	FJ10	JL5	10.444	0.00655347	0.000642507	0.00560369	0.00343037	0.000949782	1.8087	0.14918	1.45571	1.00625	0.352991	0.00802189	0.00828442	0.00759374	8.28125e-05	-0.000262524	3.2001	3.35418	3.38555	-0.169762	-0.18545
Hy507	FJ10	BJ14	10.489	0.00732398	0.00351052	0.00800028	0.00156858	-0.000676306	1.63146	0.14918	1.7726	0.670571	-0.141138	0.00811844	0.00828442	0.00768679	0.00013284	-0.000165974	3.0492	3.35418	3.51961	-0.387695	-0.47041
Hy508	FJ10	BJ8	10.425	0.00818488	0.00351052	0.0084653	0.00219697	-0.000280419	2.06926	0.14918	1.36115	1.31409	0.708101	0.00823555	0.00828442	0.00777323	0.000206731	-4.8864e-05	3.73064	3.35418	3.31956	0.393769	0.376459
Hy509	FJ10	BJ6	10.393	0.00757484	0.00351052	0.00628874	0.00267521	0.0012861	2.20755	0.14918	0.676014	1.79496	1.53154	0.00824262	0.00828442	0.00790028	0.000150272	-4.1798e-05	3.70276	3.35418	3.49047	0.280437	0.212292
Hy510	FJ10	BJ22	10.402	0.00427669	0.00351052	0.00518269	-6.9916e-05	-0.000906	0.246427	0.14918	0.241341	0.0511662	0.00508529	0.00910483	0.00828442	0.0079352	0.000995021	0.00082041	3.34247	3.35418	3.29661	0.0170749	-0.0117105
Hy511	FJ10	BJ24	10.384	0.00800895	0.00351052	0.0073792	0.0025641	0.000629758	1.77436	0.14918	1.16191	1.11881	0.612448	0.00804021	0.00828442	0.00830906	-0.000256533	-0.000268857	3.45233	3.35418	3.47846	0.0360072	-0.0261345
Hy512	FJ10	BJ15	10.351	0.00826772	0.00351052	0.00734508	0.00283992	0.000922645	2.29271	0.14918	1.34784	1.5442	0.944868	0.007938	0.00828442	0.00889096	-0.000649685	-0.000952956	3.3136	3.35418	3.59076	-0.158872	-0.277163
Hy513	FJ9	BJ16	10.372	0.00798441	0.00202062	0.00726632	0.00334094	0.000718093	2.09415	0.0603717	1.94398	1.09197	0.150166	0.00797115	0.00788351	0.00767259	0.000193096	8.7636e-05	3.23755	2.70323	3.50181	0.135039	-0.264251
Hy514	FJ10	BJ16	10.427	0.00781499	0.00351052	0.00726632	0.00242657	0.00054867	2.54273	0.14918	1.94398	1.49615	0.598745	0.00787115	0.00828442	0.00767259	-0.000107351	-0.000413264	3.61274	3.35418	3.50181	0.184748	0.110934
Hy515	HN1	BJ16	10.592	0.00803873	0.00292099	0.00726632	0.00294507	0.000772412	2.28875	0.123639	1.94398	1.25494	0.344774	0.00845791	0.00876618	0.00767259	0.000238521	-0.000308275	3.69547	3.52194	3.50181	0.183595	0.173525
Hy516	HN3	BJ16	10.462	0.00816717	0.00263686	0.00726632	0.00321558	0.000900849	2.47849	0.0795949	1.94398	1.46671	0.534513	0.00837441	0.0091368	0.00767259	-3.0285e-05	-0.000762391	3.72008	3.4313	3.50181	0.253531	0.218279
Hy517	HN7	BJ16	10.43	0.00816571	0.00309994	0.00726632	0.00298258	0.000899393	2.21683	0.102736	1.94398	1.19347	0.272846	0.0087932	0.00857971	0.00767259	0.000667045	0.000213483	3.60032	3.41078	3.50181	0.144031	0.0985182
Hy518	FJ5	BJ16	10.45	0.00816151	0.00188224	0.00726632	0.00358723	0.000895189	1.98866	0.0508163	1.94398	0.99126	0.0446778	0.00759126	0.00757556	0.00767259	-3.282e-05	-8.1333e-05	3.11119	2.65837	3.50181	0.0311071	-0.390611
Hy519	HN9	FJ11	7.147	0.00738672	0.00427445	0.008567	0.000965997	-0.00118028	2.08805	0.269503	2.35371	0.77644	-0.265661	0.00795753	0.00855314	0.00820402	-0.000421051	-0.000595609	3.71852	3.56203	3.5586	0.158213	0.156497
Hy520	HN10	FJSA40.2	7.37	0.00718953	0.00428293	0.0062828	0.00190667	0.000906738	2.24337	0.291722	0.740501	1.72726	1.50287	0.00826103	0.00828578	0.00874198	-0.000252845	-0.000480947	3.90488	3.63441	3.51204	0.331658	0.270471
Hy522	FJ11	NGS21L.1	2.122	0.00842909	0.008567	0.00807234	0.000109428	-0.0001379	2.70679	2.35371	2.19652	0.431672	0.353079	0.00813354	0.00820402	0.00846442	-0.000200687	-0.000330889	3.99239	3.5586	3.8089	0.308636	0.183483
Hy523	FJ11	JHBMY20.1	3.897	0.0082943	0.008567	0.0076869	0.000167356	-0.000272694	2.66297	2.35371	2.70178	0.13522	-0.0388182	0.00802901	0.00820402	0.00858307	-0.000364541	-0.000554067	4.12792	3.5586	3.83298	0.432134	0.294942
Hy524	FJSA40.2	GT99.1	2.046	0.00833466	0.0062828	0.0082448	0.00107087	8.9864e-05	2.86028	0.740501	2.50344	1.23831	0.356838	0.0083281	0.00874198	0.00850003	-0.000292905	-0.000413881	3.87133	3.51204	3.82402	0.2033	0.04731
Hy525	GT99.1	NGS21L.1	2.108	0.00818849	0.0082448	0.00807234	2.9924e-05	-5.6306e-05	3.19252	2.50344	2.19652	0.842534	0.689072	0.00811387	0.00850003	0.00846442	-0.000368361	-0.000386164	4.05016	3.82402	3.8089	0.233704	0.226146
Hy526	GT99.1	JHBMY20.1	3.838	0.00834909	0.0082448	0.0076869	0.000383241	0.00010429	3.17805	2.50344	2.70178	0.575437	0.476268	0.00877372	0.00850003	0.00858307	0.000232171	0.00019065	4.18932	3.82402	3.83298	0.360822	0.356341
Hy527	FJSA40.2	NGS21L.1	1.522	0.00819282	0.0062828	0.00807234	0.00101525	0.00012048	2.8107	0.740501	2.19652	1.34219	0.61418	0.00899987	0.00874198	0.00846442	0.000396664	0.000257885	3.89991	3.51204	3.8089	0.239438	0.0910064
Hy528	JHBMY20.1	NGS21L.1	3.236	0.00848274	0.0076869	0.00807234	0.000603121	0.000410399	2.88485	2.70178	2.19652	0.435703	0.183071	0.00819788	0.00858307	0.00846442	-0.000325867	-0.000385191	4.1077	3.83298	3.8089	0.286761	0.274722
Hy529	HN9	HN10	0.381	0.00437749	0.00427445	0.00428293	9.88025e-05	9.4561e-05	0.269714	0.269503	0.291722	-0.010899	-0.0220083	0.00794352	0.00855314	0.00828578	-0.000475932	-0.000609613	3.79109	3.56203	3.63441	0.192866	0.156673
Hy530	HN1	HN9	11.668	0.00588321	0.00292099	0.00427445	0.00228549	0.00160876	0.946549	0.123639	0.269503	0.749978	0.677046	0.0079547	0.00876618	0.00855314	-0.000704961	-0.000811483	3.93932	3.52194	3.56203	0.397338	0.377296
Hy531	HN7	HN9	11.514	0.00622744	0.00309994	0.00427445	0.00254025	0.00195299	0.989906	0.102736	0.269503	0.803786	0.720402	0.00816647	0.00857971	0.00855314	-0.000399959	-0.000413247	3.97466	3.41078	3.56203	0.48826	0.412636
Hy532	FJ7	HN9	11.558	0.00416416	0.00335876	0.00427445	0.000347558	-0.000110289	0.307287	0.125692	0.269503	0.10969	0.0377841	0.00818593	0.00803367	0.00855314	-0.000107479	-0.000367213	3.80104	3.2487	3.56203	0.395674	0.239009
Hy533	FJ9	HN9	11.527	0.00414887	0.00202062	0.00427445	0.00100133	-0.000125581	0.192763	0.0603717	0.269503	0.0278259	-0.07674	0.00723821	0.00788351	0.00855314	-0.000980114	-0.00131493	2.97354	2.70323	3.56203	-0.159091	-0.588491
Hy534	FJ10	HN9	11.561	0.00622956	0.00351052	0.00427445	0.00233708	0.00195512	0.894633	0.14918	0.269503	0.685292	0.62513	0.008117	0.00828442	0.00855314	-0.00030178	-0.00043614	3.82395	3.35418	3.56203	0.365844	0.261919
Hy535	HN6	HN10	11.607	0.00579605	0.00119069	0.00428293	0.00305924	0.00151312	0.637626	0.0450577	0.291722	0.469236	0.345904	0.00825921	0.00845369	0.00828578	-0.000110529	-0.000194486	3.95884	3.33306	3.63441	0.475105	0.324427
Hy536	HN7	HN10	11.569	0.00592544	0.00309994	0.00428293	0.00223401	0.00164251	0.931563	0.102736	0.291722	0.734334	0.639841	0.00796884	0.00857971	0.00828578	-0.00046391	-0.000610878	3.98452	3.41078	3.63441	0.461922	0.350105
Hy537	FJ5	HN10	11.587	0.00603134	0.00188224	0.00428293	0.00294876	0.00174841	0.600132	0.0508163	0.291722	0.428863	0.30841	0.00735477	0.00757556	0.00828578	-0.000575903	-0.00093101	3.55228	2.65837	3.63441	0.405886	-0.0821357
Hy538	FJ9	HN10	11.573	0.00624683	0.00202062	0.00428293	0.00309505	0.0019639	0.76621	0.0603717	0.291722	0.590163	0.474488	0.00753015	0.00788351	0.00828578	-0.00055449	-0.000755624	3.51725	2.70323	3.63441	0.348432	-0.117162
Hy539	SX2	HN9	9.998	0.00616758	0.00247957	0.00427445	0.00279057	0.00189313	1.64623	0.0711574	0.269503	1.4759	1.37673	0.00721729	0.00785433	0.00855314	-0.000986446	-0.00133585	3.52081	2.93834	3.56203	0.270624	-0.0412189
Hy540	SX4	HN9	10.028	0.00653357	0.00460424	0.00427445	0.00209423	0.00192933	2.01362	0.251004	0.269503	1.75336	1.74411	0.00749516	0.00803571	0.00855314	-0.000799263	-0.00105798	3.74066	3.28531	3.56203	0.316988	0.178628
Hy541	SX6	HN9	10.13	0.00640737	0.00413505	0.00427445	0.00220263	0.00213293	2.19101	0.190368	0.269503	1.96107	1.92151	0.00739485	0.00732086	0.00855314	-0.000542146	-0.00115829	3.90006	3.24028	3.56203	0.498914	0.338038
Hy542	SX7	HN9	9.81	0.00664211	0.00555775	0.00427445	0.00172602	0.00108437	1.90568	0.286284	0.269503	1.62778	1.61939	0.00740509	0.00747561	0.00855314	-0.000609283	-0.00114804	3.58938	3.32933	3.56203	0.1437	0.0273516
Hy543	SX2	HN10	10.047	0.0043649	0.00247957	0.00428293	0.000983655	8.1972e-05	0.297526	0.0711574	0.291722	0.116087	0.00580441	0.00813728	0.00785433	0.00828578	6.723e-05	-0.000148493	3.13173	2.93834	3.63441	-0.15465	-0.502687
Hy544	SX5	HN10	10.143	0.00673534	0.00200009	0.00428293	0.00359383	0.0024524	1.69154	0.0423568	0.291722	1.5245	1.39982	0.0080296	0.00864265	0.00828578	-0.000434617	-0.000613055	3.46737	2.70693	3.63441	0.296701	-0.167042
Hy545	SX6	HN10	10.089	0.00668625	0.00413505	0.00428293	0.00247726	0.00240331	1.66123	0.190368	0.291722	1.42019	1.36951	0.00783254	0.00732086	0.00828578	2.92255e-05	-0.000453233	3.59782	3.24028	3.63441	0.160476	-0.0365929
Hy546	SX2	FJ11	8.784	0.00803236	0.00247957	0.008567	0.00250908	-0.000534637	2.43414	0.0711574	2.35371	1.22171	0.0804314	0.00704269	0.00785433	0.00820402	-0.000986488	-0.00116133	3.49731	2.93834	3.5586	0.248845	-0.0612826
Hy547	SX3	FJ11	8.877	0.00610503	0.00247219	0.008567	0.000585437	-0.00246196	0.631019	0.058222	2.35371	-0.574946	-1.72269	0.00754991	0.00844804	0.00820402	-0.000776119	-0.000898128	3.40035	3.24647	3.5586	-0.00218197	-0.158243
Hy548	SX5	FJ11	8.868	0.00843205	0.00200009	0.008567	0.00314851	-0.000134947	2.73966	0.0423568	2.35371	1.54162	0.385949	0.00700644	0.00864265	0.00820402	-0.0014169	-0.00163621	3.70426	2.70693	3.5586	0.571496	0.145663
Hy549	SX6	FJ11	8.95	0.0084083	0.00413505	0.008567	0.00205728	-0.000158696	2.68306	0.190368	2.35371	1.41103	0.329357	0.00742085	0.00732086	0.00820402	-0.000341594	-0.000783175	3.74167	3.24028	3.5586	0.342233	0.183072
Hy550	SX2	GT99.1	8.889	0.00841048	0.00247957	0.0082448	0.0030483	0.000165683	2.8116	0.0711574	2.50344	1.5243	0.308152	0.00677381	0.00785433	0.00850003	-0.00140337	-0.00172622	3.49675	2.93834	3.82402	0.11557	-0.327269
Hy551	SX4	GT99.1	8.968	0.00872504	0.00460424	0.0082448	0.00230052	0.000480242	2.82505	0.251004	2.50344	1.44782	0.321603	0.00711806	0.00803571	0.00850003	-0.00114981	-0.00138197	3.79168	3.28531	3.82402	0.237012	-0.0323433
Hy552	SX6	GT99.1	9.061	0.00842156	0.00413505	0.0082448	0.00223163	0.000176759	2.86975	0.190368	2.50344	1.52285	0.366308	0.00714381	0.00732086	0.00850003	-0.000766637	-0.00135622	3.75887	3.24028	3.82402	0.226721	-0.0651513
Hy553	SX7	GT99.1	8.724	0.00865445	0.00566424	0.00837876	0.00163295	0.000275699	2.70482	0.241067	2.72429	1.22215	-0.0194614	0.00753778	0.009086	0.00832755	-0.00116899	-0.00154822	3.49406	3.19556	3.82369	-0.0155595	-0.329627
Hy554	SX2	FJSA40.2	8.896	0.00841716	0.00265221	0.0066906	0.00374575	0.00172656	2.29209	0.0654649	0.753637	1.88253	1.53845	0.00712112	0.00764278	0.00809314	-0.000746843	-0.000972024	3.30904	2.80238	3.54467	0.135513	-0.235629
Hy555	SX4	FJSA40.2	8.996	0.00841056	0.00457377	0.0066906	0.00277838	0.00171997	2.30694	0.229336	0.753637	1.81545	1.5533	0.00807835	0.00801016	0.00809314	2.6699e-05	-1.4794e-05	3.34091	3.39272	3.54467	-0.127788	-0.203761
Hy556	SX6	FJSA40.2	9.096	0.00472534	0.00389746	0.0066906	-0.00056869	-0.00196526	0.309264	0.120814	0.753637	-0.127961	-0.444373	0.00809271	0.00952409	0.00809314	-0.000715908	-0.00143138	3.19628	3.2133	3.54467	-0.182703	-0.348389
Hy557	SX7	FJSA40.2	8.757	0.0083138	0.00566424	0.0066906	0.00213638	0.0016232	2.18904	0.241067	0.753637	1.69168	1.4354	0.00788411	0.009086	0.00809314	-0.000705461	-0.00120189	3.25269	3.19556	3.54467	-0.117424	-0.29198
Hy558	SX2	JHBMY20.1	10.322	0.0084148	0.00265221	0.00793165	0.00312287	0.000483149	2.38847	0.0654649	2.60167	1.0549	-0.213202	0.00796825	0.00764278	0.00912745	-0.000416865	-0.0011592	3.15543	2.80238	3.9756	-0.233559	-0.820168
Hy559	SX4	JHBMY20.1	10.386	0.00849387	0.00457377	0.00793165	0.00224115	0.000562215	2.51841	0.229336	2.60167	1.1029	-0.083261	0.00829706	0.00801016	0.00912745	-0.000271746	-0.00083039	3.40347	3.39272	3.9756	-0.280692	-0.572131
Hy560	SX5	JHBMY20.1	10.424	0.00849835	0.00219676	0.00793165	0.00343414	0.000566698	2.62908	0.0425164	2.60167	1.30699	0.0274114	0.00797878	0.00911129	0.00912745	-0.00114059	-0.00114867	3.29442	2.85437	3.9756	-0.120569	-0.681183
Hy561	SX3	NGS21L.1	8.931	0.00855624	0.00294428	0.00839059	0.0028888	0.000165649	2.24161	0.0886404	2.3476	1.02349	-0.105986	0.00809271	0.0083419	0.00847162	-0.000314047	-0.000378907	3.19628	3.26552	3.73685	-0.304903	-0.540568
Hy562	SX4	NGS21L.1	8.872	0.00862918	0.00457377	0.00839059	0.002147	0.000238589	2.36756	0.229336	2.3476	1.0791	0.0199661	0.00788411	0.00801016	0.00847162	-0.000356775	-0.000587504	3.25269	3.39272	3.73685	-0.312098	-0.48416
Hy563	SX6	NGS21L.1	8.97	0.00864664	0.00389746	0.00839059	0.00250261	0.00025605	2.33665	0.120814	2.3476	1.10245	-0.0109466	0.00789096	0.00952409	0.00847162	-0.0011069	-0.00163313	3.22626	3.2133	3.73685	-0.248809	-0.510585
Hy564	SX7	NGS21L.1	8.648	0.0089247	0.00566424	0.00839059	0.00189729	0.000534115	2.12338	0.241067	2.3476	0.829047	-0.224218	0.00811668	0.009086	0.00847162	-0.00066213	-0.000969322	3.10521	3.19556	3.73685	-0.36099	-0.631636
Hy565	HN1	FJ11	10.613	0.00804525	0.00222678	0.00882291	0.0025204	-0.000777665	2.04467	0.0765766	2.40835	0.802205	-0.363682	0.00819595	0.00830915	0.00846993	-0.000193589	-0.000273979	3.51014	3.59587	3.70768	-0.14164	-0.197543
Hy567	HN3	FJ11	10.485	0.00807957	0.00277415	0.00882291	0.00228104	-0.00074334	2.40128	0.0757674	2.40835	1.15922	-0.00707281	0.00811732	0.00903527	0.00846993	-0.000635284	-0.000917952	3.52765	3.46208	3.70768	-0.0572263	-0.180029
Hy568	HN5	FJ11	10.47	0.00764342	0.00248731	0.00882291	0.00198831	-0.00117949	1.72594	0.0725878	2.40835	0.485472	-0.682409	0.00852809	0.00869947	0.00846993	-5.66095e-05	-0.000171377	3.63578	3.23358	3.70768	0.16515	-0.0719002
Hy569	HN7	FJ11	10.473	0.00785933	0.00326456	0.00882291	0.00181559	-0.000963584	2.04133	0.122287	2.40835	0.77601	-0.367022	0.00894068	0.00865869	0.00846993	0.000376368	0.00028199	3.56903	3.34533	3.70768	0.0425233	-0.138651
Hy570	HN1	GT99.1	10.685	0.00799809	0.00222678	0.00837876	0.00269533	-0.000380662	2.6718	0.0765766	2.72429	1.27137	-0.0524807	0.00850065	0.00830915	0.00832755	0.000182302	0.000173101	3.72066	3.59587	3.82369	0.0108757	-0.103032
Hy571	HN2	GT99.1	10.525	0.00793279	0.00339731	0.00837876	0.00204476	-0.000445965	2.67152	0.122358	2.72429	1.2482	-0.0527677	0.00863956	0.00862697	0.00832755	0.000162298	1.2591e-05	3.71191	3.484	3.82369	0.0580683	-0.111775
Hy573	HN7	GT99.1	10.593	0.00813682	0.00326456	0.00837876	0.00231517	-0.000241931	2.3243	0.122287	2.72429	0.901015	-0.399984	0.00832168	0.00865869	0.00832755	-0.000171443	-0.00033701	3.71193	3.34533	3.82369	0.12742	-0.111759
Hy574	FJ7	GT99.1	10.622	0.00804215	0.00311977	0.00837876	0.00229289	-0.000336605	2.54711	0.103141	2.72429	1.1334	-0.177174	0.0083446	0.00824083	0.00832755	6.04135e-05	1.7051e-05	3.53881	3.18698	3.82369	0.0334741	-0.284883
Hy575	FJ9	FJ11	10.459	0.00860864	0.00220011	0.00882291	0.00309713	-0.00021427	2.20034	0.0549786	2.40835	0.968678	-0.208008	0.00752103	0.00722144	0.00846993	-0.000324655	-0.0009489	3.46748	2.77228	3.70768	0.227496	-0.240203
Hy577	HN1	FJSA40.2	10.65	0.00792881	0.00222678	0.0066906	0.00347012	0.00123821	2.15268	0.0765766	0.753637	1.73757	1.39904	0.00809108	0.00830915	0.00809314	-0.000110067	-0.000218071	3.63585	3.59587	3.54467	0.0655833	0.0399801
Hy578	HN2	FJSA40.2	10.482	0.00770711	0.00339731	0.0066906	0.00266316	0.00101651	2.43937	0.122358	0.753637	2.00137	1.68573	0.00866774	0.00862697	0.00809314	0.000307682	4.0771e-05	3.82756	3.484	3.54467	0.313229	0.282896
Hy579	HN7	FJSA40.2	10.552	0.00770701	0.00326456	0.0066906	0.00272942	0.00101641	1.67324	0.122287	0.753637	1.23528	0.919606	0.0088952	0.00865869	0.00809314	0.000519288	0.000236517	3.6042	3.34533	3.54467	0.159204	0.0595359
Hy580	FJ5	FJSA40.2	10.555	0.00784768	0.00218376	0.0066906	0.0034105	0.00115708	1.90785	0.0580321	0.753637	1.50202	1.15422	0.00832273	0.00749481	0.00809314	0.000528748	0.000229582	3.19074	2.62775	3.54467	0.104529	-0.353928
Hy581	FJ7	FJSA40.2	10.577	0.00803654	0.00311977	0.0066906	0.00313135	0.00134594	2.21373	0.103141	0.753637	1.78534	1.46009	0.00866605	0.00824083	0.00809314	0.000499068	0.000425226	3.47971	3.18698	3.54467	0.113888	-0.0649578
Hy584	FJ5	NGS21L.1	10.529	0.00833992	0.00218376	0.00839059	0.00305274	-5.0674e-05	2.34405	0.0580321	2.3476	1.14123	-0.00354973	0.00775266	0.00749481	0.00847162	-0.000230558	-0.000718959	3.52789	2.62775	3.73685	0.345586	-0.208961
Hy585	HN2	JHBMY20.1	11.856	0.00703823	0.00339731	0.00793165	0.00137375	-0.000893422	1.1155	0.122358	2.60167	-0.246508	-1.48616	0.00863029	0.00862697	0.00912745	-0.000246912	-0.000497152	3.94458	3.484	3.9756	0.214776	-0.0310239
Hy586	HN6	JHBMY20.1	12.076	0.00793946	0.0012149	0.00793165	0.00336619	7.812e-06	2.1641	0.0431559	2.60167	0.841683	-0.437573	0.00837407	0.00314941	0.00912745	0.00223564	-0.000753378	3.58318	2.94363	3.9756	0.123562	-0.392425
Hy587	HN7	JHBMY20.1	11.932	0.00784586	0.00326456	0.00793165	0.00224775	-8.5793e-05	2.25039	0.122287	2.60167	0.888412	-0.351278	0.00846153	0.00865869	0.00912745	-0.000431539	-0.000665919	3.63868	3.34533	3.9756	-0.0217854	-0.336921
Hy588	FJ5	JHBMY20.1	11.947	0.00815146	0.00218376	0.00793165	0.00309376	0.000219811	2.08338	0.0580321	2.60167	0.753526	-0.518292	0.00821004	0.00749481	0.00912745	-0.000101091	-0.000917407	3.42222	2.62775	3.9756	0.120546	-0.553378
Hy589	HN1	JHBMY20.1	12.057	0.00756043	0.00222678	0.00793165	0.00248121	-0.000371226	2.39302	0.0765766	2.60167	1.0539	-0.208647	0.00833685	0.00830915	0.00912745	-0.000381453	-0.0007906	3.83683	3.59587	3.9756	0.0510955	-0.138768
Hy590	HN1	NGS21L.1	10.605	0.00793453	0.00222678	0.00839059	0.00262584	-0.000456061	2.33932	0.0765766	2.3476	1.12724	-0.00827429	0.00867437	0.00830915	0.00847162	0.000283986	0.000202754	3.69505	3.59587	3.73685	0.0286934	-0.0417933
Hy591	HN2	FJ11	10.424	0.00618709	0.00339731	0.00882291	7.69825e-05	-0.00263582	1.09369	0.122358	2.40835	-0.171667	-1.31466	0.00852829	0.00862697	0.00846993	-2.0155e-05	-9.8672e-05	3.75184	3.484	3.70768	0.155994	0.0441556
Hy593	HN2	NGS21L.1	10.462	0.0080179	0.00339731	0.00839059	0.00212395	-0.000372687	2.1368	0.122358	2.3476	0.901818	-0.210801	0.00844304	0.00862697	0.00847162	-0.000106249	-0.000183925	3.72939	3.484	3.73685	0.118963	-0.00745983
Hy595	HN5	NGS21L.1	10.517	0.00786944	0.00248731	0.00839059	0.00243049	-0.000521145	2.0048	0.0725878	2.3476	0.794706	-0.342799	0.00833194	0.00869947	0.00847162	-0.000253597	-0.000367523	3.84044	3.23358	3.73685	0.355224	0.103589
Hy596	HN6	NGS21L.1	10.639	0.00514114	0.0012149	0.00839059	0.000338401	-0.00324945	0.606323	0.0431559	2.3476	-0.589054	-1.74127	0.00860375	0.00314941	0.00847162	0.00279324	0.000132139	3.51498	2.94363	3.73685	0.174739	-0.22187
Hy598	HN5	FJSA40.2	10.591	0.00718417	0.00208428	0.0064478	0.00291813	0.000736373	1.65732	0.0733828	0.922402	1.15943	0.734921	0.0083208	0.00835131	0.00828865	8.165e-07	-3.0515e-05	3.63006	3.71147	3.79712	-0.124231	-0.167056
Hy599	HN6	FJSA40.2	10.727	0.00747519	0.0012149	0.0064478	0.00364384	0.00102739	1.6639	0.0431559	0.922402	1.18112	0.741501	0.00805059	0.00841264	0.00828865	-0.000300051	-0.000362048	3.62738	3.51536	3.79712	-0.0288587	-0.169739
Hy600	FJ5	FJ11	10.483	0.00813797	0.00194628	0.00867162	0.00282902	-0.000533652	1.56601	0.0446991	2.52769	0.279816	-0.96168	0.00799591	0.00782205	0.00871057	-0.000270404	-0.000714665	3.35432	2.89929	3.74192	0.0337172	-0.387598
Hy601	FJ5	GT99.1	10.601	0.00809193	0.00194628	0.00819348	0.00302206	-0.000101544	2.44835	0.0446991	2.71241	1.0698	-0.264056	0.00821119	0.00782205	0.00878242	-9.1047e-05	-0.00057123	3.38412	2.89929	3.8413	0.0138202	-0.457185
Hy602	FJ7	FJ11	10.508	0.00808716	0.00287197	0.00867162	0.00231536	-0.000584459	2.54105	0.102426	2.52769	1.22599	0.0133577	0.0085763	0.00872342	0.00871057	-0.000140696	-0.000147119	3.67014	3.33252	3.74192	0.13292	-0.0717806
Hy604	FJ7	JHBMY20.1	11.969	0.00792251	0.00287197	0.00785525	0.00255889	6.7256e-05	2.32752	0.102426	2.90676	0.822923	-0.579243	0.00821407	0.00872342	0.00854399	-0.000419638	-0.000509351	3.88326	3.33252	4.0215	0.206253	-0.138236
Hy605	FJ7	NGS21L.1	10.55	0.00837967	0.00287197	0.00790383	0.00299177	0.000475843	1.97189	0.102426	2.54238	0.649486	-0.570491	0.00925719	0.00872342	0.0086369	0.000577026	0.000533767	3.53841	3.33252	4.0832	-0.169451	-0.544791
Hy606	FJ8	GT99.1	10.641	0.0082756	0.00289141	0.00819348	0.00273316	8.2121e-05	2.41046	0.0980806	2.71241	1.00521	-0.30195	0.00850095	0.00823607	0.00878242	-8.2965e-06	-0.000281469	3.84975	3.5727	3.8413	0.142753	0.00845349
Hy607	FJ8	JHBMY20.1	11.983	0.00803463	0.00289141	0.00785525	0.0026613	0.000179382	2.28359	0.0980806	2.90676	0.781166	-0.623173	0.00837707	0.00823607	0.00854399	-1.2964e-05	-0.000166924	3.88895	3.5727	4.0215	0.0918502	-0.132548
Hy608	FJ8	NGS21L.1	10.568	0.00687032	0.00289141	0.00790383	0.0014727	-0.00103351	0.990193	0.0980806	2.54238	-0.330037	-1.55219	0.0082779	0.00823607	0.0086369	-0.000158585	-0.000358999	3.32836	3.5727	4.0832	-0.499593	-0.754841
Hy609	FJ9	NGS21L.1	10.504	0.00821713	0.00231554	0.00790383	0.00310744	0.000313298	1.9805	0.0565164	2.54238	0.681053	-0.561878	0.00787713	0.00771925	0.0086369	-0.000300946	-0.000759771	3.42272	3.08162	4.0832	-0.159685	-0.660476
Hy610	FJ10	FJ11	10.512	0.00828382	0.00326769	0.00867162	0.00231416	-0.000387805	2.03018	0.137142	2.52769	0.697768	-0.497507	0.00907673	0.00815785	0.00871057	0.000642523	0.000366161	3.60627	3.87046	3.74192	-0.199914	-0.264182
Hy611	FJ10	NGS21L.1	10.551	0.00837983	0.00326769	0.00790383	0.00279408	0.000476005	1.91242	0.137142	2.54238	0.572658	-0.62996	0.00914158	0.00815785	0.0086369	0.000744201	0.000504675	3.68045	3.87046	4.0832	-0.296379	-0.402751
Hy613	FJ8	FJSA40.2	10.598	0.00805375	0.00289141	0.0064478	0.00338415	0.00160595	1.9796	0.0980806	0.922402	1.46936	1.0572	0.00833792	0.00823607	0.00828865	7.55595e-05	4.9272e-05	3.66609	3.5727	3.79712	-0.0188196	-0.131027
Hy614	FJ10	FJSA40.2	10.591	0.00764372	0.00326769	0.0064478	0.00278598	0.00119592	2.29021	0.137142	0.922402	1.76043	1.3678	0.00827122	0.00815785	0.00828865	4.797e-05	-1.7429e-05	3.91965	3.87046	3.79712	0.0858612	0.0491922
Hy615	HN3	GT99.1	10.6	0.00803964	0.00213219	0.00819348	0.0028768	-0.000153841	2.62752	0.045503	2.71241	1.24857	-0.0848858	0.00804694	0.00886519	0.00878242	-0.000776868	-0.000818257	4.05287	3.48619	3.8413	0.389126	0.211573
Hy617	HN7	NGS21L.1	10.518	0.00800457	0.00322804	0.00790383	0.00243864	0.00010074	2.29793	0.129381	2.54238	0.962047	-0.244452	0.00811516	0.00855376	0.0086369	-0.000480173	-0.00052174	3.84744	3.60549	4.0832	0.00309566	-0.235759
Hy618	HN6	FJ11	10.616	0.00800241	0.0012149	0.00867162	0.00305915	-0.000669216	1.86446	0.0431559	2.52769	0.579035	-0.663232	0.00846389	0.00841264	0.00871057	-9.77195e-05	-0.000246685	3.759	3.51536	3.74192	0.130361	0.0170795
Hy619	FJ9	JHBMY20.1	11.928	0.00821937	0.00231554	0.00785525	0.00313397	0.000364119	2.03462	0.0565164	2.90676	0.552985	-0.872136	0.0085086	0.00771925	0.00854399	0.000376984	-3.5388e-05	3.38925	3.08162	4.0215	-0.162311	-0.632252
Hy620	FJ10	JHBMY20.1	11.972	0.00802802	0.00326769	0.00785525	0.00246656	0.000172773	2.70857	0.137142	2.90676	1.18662	-0.198192	0.00854815	0.00815785	0.00854399	0.000197227	4.156e-06	3.93371	3.87046	4.0215	-0.0122632	-0.0877847
Hy621	HLJ3	BJ7	3.765	0.00898934	0.00840598	0.00904184	0.000265433	-5.2495e-05	3.14354	2.09415	2.8603	0.666315	0.28324	0.00877148	0.0082727	0.00872152	0.000274365	4.9958e-05	3.79676	3.5246	4.05625	0.00633479	-0.259491
Hy622	HLJ3	XJ3	4.582	0.00816372	0.00840598	0.00616425	0.000878607	-0.000242259	2.51962	2.09415	1.05715	0.943971	0.425467	0.00790387	0.0082727	0.00802285	-0.00024391	-0.000368838	3.37193	3.5246	3.0775	0.0708813	-0.152669
Hy623	HLJ3	SD1	4.444	0.00881743	0.00840598	0.00317346	0.0030277	0.000411445	2.28688	2.09415	0.266701	1.10645	0.192726	0.00844133	0.0082727	0.00960657	-0.000498309	-0.00116524	3.21385	3.5246	3.33894	-0.217924	-0.310755
Hy624	JL5	FJ11	6.247	0.00909654	0.00359402	0.00867162	0.00296372	0.000424918	2.4488	0.148086	2.52769	1.11091	-0.0788925	0.00892329	0.00803924	0.00871057	0.000548386	0.000212721	3.67241	3.26352	3.74192	0.169695	-0.0695057
Hy626	BJ22	FJ11	6.254	0.000341923	0.00454817	0.00867162	-0.00626797	-0.0083297	0.00656453	0.161798	2.52769	-1.33818	-2.52113	0.00963063	0.0089396	0.00871057	0.000805542	0.000691029	2.89491	3.51675	3.74192	-0.734425	-0.847009
Hy628	JL5	GT99.1	6.39	0.00891786	0.00359402	0.00819348	0.00302411	0.000724379	2.74401	0.148086	2.71241	1.31377	0.0316074	0.00788658	0.00803924	0.00878242	-0.000524252	-0.000895839	3.85636	3.26352	3.8413	0.303951	0.0150598
Hy629	BJ8	GT99.1	6.178	0.00876946	0.00824504	0.00819348	0.000550202	0.000524421	3.00414	1.70834	2.71241	0.793768	0.291736	0.00831015	0.0079168	0.00878242	-3.94585e-05	-0.000472269	3.81266	3.50348	3.8413	0.140267	-0.0286431
Hy630	HLJ1	JHBMY20.1	7.872	0.00908029	0.00794172	0.00785525	0.0011818	0.00113856	2.87426	2.3531	2.90676	0.244327	-0.0325015	0.00817681	0.00889631	0.00854399	-0.000543339	-0.000719496	3.72231	3.61908	4.0215	-0.0979742	-0.299186
Hy631	BJ14	JHBMY20.1	7.758	0.00945214	0.00726304	0.00768677	0.00197724	0.00176537	2.32638	1.18081	2.58809	0.441932	-0.261708	0.00848698	0.0074555	0.0080251	0.00074668	0.000461879	3.85746	3.26123	3.91691	0.26839	-0.0594521
Hy632	BJ8	JHBMY20.1	7.64	0.00863363	0.00824504	0.00785525	0.000583489	0.000388595	2.99458	1.70834	2.90676	0.687032	0.0878243	0.00835766	0.0079168	0.00854399	0.000127267	-0.000186331	3.98414	3.50348	4.0215	0.221655	-0.0373542
Hy633	BJ6	JHBMY20.1	7.749	0.00843291	0.00617483	0.00785525	0.00141787	0.000577661	3.1543	0.71992	2.90676	1.34096	0.247545	0.00836973	0.00802553	0.00854399	8.4972e-05	-0.00017426	4.1031	3.72785	4.0215	0.22843	0.081604
Hy634	HLJ1	NGS21L.1	6.202	0.008564	0.00794172	0.00790383	0.000641221	0.000622274	2.79347	2.3531	2.54238	0.345734	0.251096	0.00801122	0.00889631	0.0086369	-0.000755386	-0.000885089	4.02276	3.61908	4.0832	0.17162	-0.0604415
Hy635	BJ14	NGS21L.1	6.269	0.00930791	0.00726304	0.00790383	0.00172447	0.00140408	2.73527	1.18081	2.54238	0.873678	0.192891	0.00784945	0.0074555	0.0086369	-0.000196748	-0.000787449	3.75235	3.26123	4.0832	0.0801335	-0.330853
Hy636	BJ8	NGS21L.1	6.105	0.00908361	0.00824504	0.00790383	0.00100918	0.000838571	2.69596	1.70834	2.54238	0.570597	0.153579	0.00792893	0.0079168	0.0086369	-0.000347921	-0.000707973	3.82512	3.50348	4.0832	0.03178	-0.258079
Hy637	BJ6	NGS21L.1	6.18	0.00846363	0.00617483	0.00790383	0.0014243	0.000559802	2.77923	0.71992	2.54238	1.14808	0.236847	0.00789207	0.00802553	0.0086369	-0.000439146	-0.000744832	3.94111	3.72785	4.0832	0.0355887	-0.142088
Hy638	HLJ1	FJSA40.2	6.28	0.00910319	0.00794172	0.0064478	0.00190843	0.00116147	2.27061	2.3531	0.922402	0.632861	-0.0824895	0.00796799	0.00889631	0.00828865	-0.000624491	-0.00092832	3.52132	3.61908	3.79712	-0.186772	-0.275793
Hy639	BJ14	FJSA40.2	6.274	0.00869787	0.00726304	0.0064478	0.00184245	0.00143483	2.75851	1.18081	0.922402	1.70691	1.5777	0.00801716	0.0074555	0.00828865	0.000145087	-0.000271487	3.75257	3.26123	3.79712	0.223396	-0.0445494
Hy640	BJ8	FJSA40.2	6.138	0.00773002	0.00824504	0.0064478	0.000383596	-0.000515023	2.30228	1.70834	0.922402	0.986909	0.593938	0.00821155	0.0079168	0.00828865	0.000108828	-7.7098e-05	3.38017	3.50348	3.79712	-0.270127	-0.416945
Hy641	BJ17	FJ11	6.018	0.00875352	0.00841438	0.00867162	0.00021052	8.1899e-05	2.9179	2.46355	2.52769	0.422279	0.390207	0.00843669	0.00914983	0.00871057	-0.000493515	-0.000713143	3.9091	3.45684	3.74192	0.309718	0.167178
Hy642	BJ26	FJ11	6.142	0.00893694	0.00732128	0.00867162	0.000940484	0.000265315	2.70999	1.49242	2.52769	0.699939	0.182301	0.00795906	0.00798956	0.00871057	-0.000391007	-0.000751516	3.84514	3.48252	3.74192	0.232919	0.10322
Hy643	BJ18	GT99.1	6.241	0.00887786	0.00833529	0.00815855	0.000630942	0.000542571	2.75427	2.24514	2.70504	0.279176	0.0492239	0.00810561	0.00773019	0.00832263	7.91975e-05	-0.000217019	3.96791	3.63448	3.99314	0.154104	-0.0252261
Hy644	BJ26	GT99.1	6.286	0.00936379	0.00767065	0.00815855	0.0014492	0.00120525	2.60046	1.30492	2.70504	0.595477	-0.104582	0.00942554	0.00831668	0.00832263	0.00110589	0.00110292	3.57553	3.61979	3.99314	-0.230937	-0.417611
Hy645	BJ20	GT99.1	6.231	0.00727379	0.0080342	0.00815855	-0.00082258	-0.000884756	2.17011	1.49185	2.70504	0.0716632	-0.534932	0.00875312	0.0086295	0.00832263	0.000277053	0.000123619	3.30838	3.51035	3.99314	-0.443358	-0.684753
Hy646	BJ17	JHBMY20.1	7.651	0.0089466	0.00804572	0.00768677	0.00108036	0.000900883	2.66615	2.41641	2.58809	0.163902	0.0780632	0.0089306	0.00788756	0.0080251	0.000974267	0.000905496	3.83107	3.68438	3.91691	0.0304251	-0.085842
Hy647	BJ18	JHBMY20.1	7.716	0.00905785	0.00833529	0.00768677	0.00104682	0.000722559	2.61738	2.24514	2.58809	0.200765	0.0292919	0.00856136	0.00773019	0.0080251	0.000683717	0.000536264	3.77625	3.63448	3.91691	0.00055568	-0.140661
Hy648	BJ20	JHBMY20.1	7.736	0.00877556	0.0080342	0.00768677	0.000915081	0.000741368	2.71106	1.49185	2.58809	0.671089	0.122971	0.00892428	0.0086295	0.0080251	0.000596977	0.000294779	3.85478	3.51035	3.91691	0.141153	-0.0621289
Hy649	BJ26	JHBMY20.1	7.722	0.00892936	0.00767065	0.00768677	0.00125065	0.00124259	2.75943	1.30492	2.58809	0.812923	0.171343	0.00885248	0.00831668	0.0080251	0.000681595	0.000535808	3.88597	3.61979	3.91691	0.117624	-0.0309364
Hy650	BJ17	NGS21L.1	6.057	0.00886189	0.00804572	0.00844527	0.000616396	0.000416622	2.75514	2.41641	2.12456	0.484657	0.338734	0.00816501	0.00788756	0.00800909	0.00021669	0.000155924	3.62603	3.68438	4.02353	-0.22792	-0.397498
Hy651	BJ18	NGS21L.1	6.16	0.00915907	0.00833529	0.00844527	0.000768797	0.000713809	2.16396	2.24514	2.12456	-0.0208873	-0.0811755	0.00869574	0.00773019	0.00800909	0.000826103	0.000686656	3.64465	3.63448	4.02353	-0.184358	-0.378885
Hy652	BJ20	NGS21L.1	6.119	0.00899276	0.0080342	0.00844527	0.000753032	0.000547497	2.24604	1.49185	2.12456	0.437831	0.121475	0.00872037	0.0086295	0.00800909	0.00040108	9.0876e-05	3.67561	3.51035	4.02353	-0.0913264	-0.347918
Hy653	BJ26	NGS21L.1	6.22	0.00906934	0.00767065	0.00844527	0.00101138	0.000624072	2.52577	1.30492	2.12456	0.811026	0.401207	0.00838298	0.00831668	0.00800909	0.000220093	6.63e-05	3.75997	3.61979	4.02353	-0.0616929	-0.263563
Hy654	BJ17	FJSA40.2	6.113	0.00907465	0.00804572	0.00649772	0.00180294	0.00102894	2.46857	2.41641	0.568504	0.976116	0.0521634	0.00831294	0.00788756	0.00834195	0.000198186	-2.9012e-05	3.53825	3.68438	3.6998	-0.153832	-0.161543
Hy655	BJ18	FJSA40.2	6.165	0.00913136	0.00833529	0.00649772	0.00171485	0.000796067	2.4162	2.24514	0.568504	1.00938	0.171061	0.0088535	0.00773019	0.00834195	0.000817432	0.000511552	3.60554	3.63448	3.6998	-0.0615964	-0.0942563
Hy656	BJ20	FJSA40.2	6.208	0.00888437	0.0080342	0.00649772	0.00161842	0.000850179	2.40401	1.49185	0.568504	1.37384	0.912162	0.00819691	0.0086295	0.00834195	-0.000288814	-0.000432585	3.56778	3.51035	3.6998	-0.0372892	-0.132014
Hy657	BJ26	FJSA40.2	6.23	0.00912207	0.00767065	0.00649772	0.00203788	0.00145142	2.26368	1.30492	0.568504	1.32696	0.958754	0.00781903	0.00831668	0.00834195	-0.000510283	-0.000522922	3.74639	3.61979	3.6998	0.0865973	0.0465936
Hy658	BJ16	FJ11	6.163	0.00946394	0.00689801	0.00848801	0.00177094	0.000975934	2.10187	1.72176	2.3836	0.0491949	-0.281727	0.00815788	0.00818502	0.00786131	0.000134717	-2.7138e-05	3.87518	3.49996	3.80902	0.220688	0.0661561
Hy659	BJ19	FJ11	6.072	0.00950245	0.00646579	0.00848801	0.00202555	0.00101444	2.40897	1.16978	2.3836	0.63228	0.0253712	0.00801108	0.007637	0.00786131	0.000261921	0.000149767	3.72677	3.68205	3.80902	-0.0187658	-0.0822532
Hy660	BJ24	FJ11	6.132	0.009588	0.00727513	0.00848801	0.00170643	0.00109999	2.23101	1.02087	2.3836	0.528773	-0.152595	0.00838391	0.00807785	0.00786131	0.000414329	0.000306056	3.86187	3.59893	3.80902	0.157898	0.052851
Hy662	BJ16	GT99.1	6.278	0.00888442	0.00689801	0.00815855	0.00135614	0.000725869	2.73217	1.72176	2.70504	0.51877	0.0271283	0.00860405	0.00818502	0.00832263	0.000350226	0.000281421	3.88564	3.49996	3.99314	0.139093	-0.107497
Hy665	BJ27	GT99.1	6.137	0.00917547	0.00764298	0.00815855	0.00127471	0.00101692	2.86472	2.1054	2.70504	0.459506	0.159682	0.00923118	0.0080247	0.00832263	0.00105752	0.000908554	3.72769	3.47483	3.99314	-0.00629281	-0.265444
Hy666	BJ16	JHBMY20.1	7.724	0.00867184	0.00689801	0.00768677	0.00137945	0.000985071	2.94021	1.72176	2.58809	0.78529	0.352127	0.00824309	0.00818502	0.0080251	0.000138034	5.8075e-05	3.80543	3.49996	3.91691	0.0969951	-0.111482
Hy667	BJ21	JHBMY20.1	7.659	0.009306	0.00776846	0.00768677	0.00157839	0.00153755	2.69825	1.98486	2.58809	0.41178	0.110169	0.00844502	0.00833601	0.0080251	0.000264462	0.000109005	3.70364	3.6381	3.91691	-0.0738708	-0.213273
Hy668	BJ27	JHBMY20.1	7.611	0.0088202	0.00764298	0.00768677	0.00115533	0.00113344	2.67612	2.1054	2.58809	0.32938	0.088035	0.00897515	0.0080247	0.0080251	0.000950245	0.000950045	3.48739	3.47483	3.91691	-0.208487	-0.429525
Hy669	BJ19	JHBMY20.1	7.704	0.00850045	0.00646579	0.00768677	0.00142417	0.000813684	2.96856	1.16978	2.58809	1.08963	0.380477	0.00849069	0.007637	0.0080251	0.000659642	0.000465593	3.8154	3.68205	3.91691	0.0159203	-0.101512
Hy670	BJ24	JHBMY20.1	7.728	0.00840861	0.00727513	0.00768677	0.00092766	0.00072184	2.73835	1.02087	2.58809	0.933869	0.15026	0.00887398	0.00807785	0.0080251	0.000822504	0.000796127	3.95664	3.59893	3.91691	0.198726	0.039734
Hy671	BJ16	NGS21L.1	6.212	0.00859259	0.00689801	0.00844527	0.00092095	0.000147321	2.66801	1.72176	2.12456	0.74485	0.543448	0.00842348	0.00818502	0.00800909	0.00032643	0.000238465	3.90377	3.49996	4.02353	0.142024	-0.119763
Hy672	BJ21	NGS21L.1	6.077	0.00892089	0.00776846	0.00844527	0.000814026	0.000475622	2.64898	1.98486	2.12456	0.59427	0.524421	0.00873912	0.00833601	0.00800909	0.000566571	0.000403108	3.8669	3.6381	4.02353	0.0360851	-0.156628
Hy673	BJ27	NGS21L.1	6.034	0.00898557	0.00764298	0.00844527	0.000941448	0.000540306	2.5782	2.1054	2.12456	0.463218	0.453634	0.00883558	0.0080247	0.00800909	0.000818689	0.000810883	3.57084	3.47483	4.02353	-0.178341	-0.452689
Hy675	BJ15	NGS21L.1	6.093	0.00919388	0.0071196	0.00844527	0.00141145	0.000748615	2.68216	1.09869	2.12456	1.07054	0.5576	0.00840654	0.00824804	0.00800909	0.000277983	0.00015851	3.78132	3.83098	4.02353	-0.145929	-0.242206
Hy676	BJ16	FJSA40.2	6.236	0.00878377	0.00689801	0.00649772	0.00208591	0.00188577	2.61132	1.72176	0.568504	1.46619	0.889566	0.00817335	0.00818502	0.00834195	-9.01375e-05	-0.000168605	3.71914	3.49996	3.6998	0.119261	0.0193408
Hy677	BJ27	FJSA40.2	6.137	0.00871825	0.00764298	0.00649772	0.0016479	0.00107527	2.49817	2.1054	0.568504	1.16122	0.392771	0.00821111	0.0080247	0.00834195	2.77845e-05	-0.000130842	3.51848	3.47483	3.6998	-0.0688363	-0.181317
Hy678	BJ24	FJSA40.2	6.235	0.00858609	0.00727513	0.00649772	0.00169967	0.00131096	2.37793	1.02087	0.568504	1.58325	1.35707	0.0076888	0.00807785	0.00834195	-0.000521099	-0.000653149	3.66628	3.59893	3.6998	0.0169159	-0.033519
Hy679	BJ15	FJSA40.2	6.158	0.00885441	0.0071196	0.00649772	0.00204575	0.00173481	2.52651	1.09869	0.568504	1.69291	1.42782	0.0089742	0.00824804	0.00834195	0.000679202	0.000632243	3.61856	3.83098	3.6998	-0.146823	-0.212413

## Sheet: Sheet2
F1 Hybrid	Hybrid_MGR	Parent1_MGR	Parent2_MGR	MPH	BPH		Hybrid_GE	Parent1_GE	Parent2_GE	MPH	BPH
1	0.0071994	0.00693016	0.00466007	0.00140429	0.000269245		1.10043	0.713325	0.0767113	0.705413	0.387106
2	0.00788944	0.00466007	0.00644952	0.00233464	0.00143991		1.70008	0.0767113	0.225265	1.5491	1.47482
3	0.00929901	0.00693016	0.00644952	0.00260917	0.00236885		1.98105	0.713325	0.225265	1.51176	1.26773
5	0.00957827	0.00644952	0.00433851	0.00418425	0.00312874		1.05812	0.225265	0.201537	0.844716	0.832851
6_4	0.0082376	0.00575254	0.000933786	0.00489444	0.00248506		1.61107	0.440685	0.0138821	1.38379	1.17039
7_4	0.00863076	0.00575254	0.00790443	0.00180227	0.000726327		1.62143	0.440685	1.56903	0.61657	0.0523967
8_3	0.00926914	0.00575254	0.00841803	0.00218385	0.000851107		1.41397	0.440685	2.02802	0.179619	-0.614048
10	0.00888532	0.00575254	0.00880753	0.00160528	7.7789e-05		1.87328	0.440685	2.46391	0.420988	-0.590623
11_2	0.00890749	0.00575254	0.00839766	0.00183239	0.000509825		2.04058	0.440685	1.60042	1.02002	0.440156
12_1	0.00800979	0.000933786	0.00790443	0.00359068	0.000105351		0.790622	0.0138821	1.56903	-0.000834453	-0.778409
13_1	0.00945789	0.00830923	0.000933786	0.00483638	0.00114865		2.2158	1.21965	0.0138821	1.59903	0.996149
14	0.00922877	0.00880753	0.000933786	0.00435812	0.000421244		2.50603	2.46391	0.0138821	1.26713	0.0421188
15_1	0.00918005	0.00839766	0.000933786	0.00451433	0.00078239		2.50447	1.60042	0.0138821	1.69732	0.904047
16_3	0.00893008	0.00841803	0.000933786	0.00425417	0.000512043		1.74444	2.02802	0.0138821	0.723495	-0.283573
17_2	0.00908585	0.00830923	0.00841803	0.000722219	0.000667819		1.50554	1.21965	2.02802	-0.118289	-0.522473
18_1	0.00921811	0.00841803	0.00790443	0.00105687	0.000800074		1.94776	2.02802	1.56903	0.149237	-0.0802559
19_2	0.0089138	0.00830923	0.00790443	0.00080697	0.000604571		1.96793	1.21965	1.56903	0.573594	0.398903
20_1	0.00916323	0.00830923	0.00880753	0.000604845	0.000355696		2.48177	1.21965	2.46391	0.639987	0.0178576
21_2	0.00976223	0.00880753	0.00790443	0.00140625	0.000954699		1.81042	2.46391	1.56903	-0.206046	-0.653485
22_1	0.00929709	0.00880753	0.00649643	0.00164511	0.00048956		2.02574	2.46391	0.667815	0.459875	-0.438171
23_1	0.00942644	0.00841803	0.00880753	0.000813654	0.000618904		2.24444	2.02802	2.46391	-0.00152334	-0.219469
24	0.00892696	0.00839766	0.00790443	0.000775914	0.0005293		2.80901	1.60042	1.56903	1.22429	1.20859
25	0.00910737	0.00841803	0.00839766	0.000699525	0.00068934		2.47896	2.02802	1.60042	0.664738	0.45094
26_1	0.00934998	0.00830923	0.00839766	0.000996528	0.000952313		2.36875	1.21965	1.60042	0.958716	0.76833
28_2	0.0090343	0.00880753	0.00839766	0.000431703	0.000226769		1.85807	2.46391	1.60042	-0.174092	-0.605836
29_2	0.00503098	0.00123811	0.00466007	0.00208189	0.000370916		0.350724	0.0107652	0.0767113	0.306986	0.274013
30_1	0.00476246	0.00120114	0.00466007	0.00183186	0.000102394		0.386632	0.0161167	0.0767113	0.340218	0.309921
31	0.00498979	0.00152472	0.00466007	0.0018974	0.00032972		0.256804	0.0346553	0.0767113	0.201121	0.180093
32	0.00784339	0.00841803	0.00466007	0.00130434	-0.00057464		1.33003	2.02802	0.0767113	0.277663	-0.69799
33_2	0.0057796	0.00186509	0.00466007	0.00251701	0.00111953		0.222295	0.0285335	0.0767113	0.169672	0.145583
34_1	0.00815091	0.00830923	0.00466007	0.00166626	-0.000158323		1.34244	1.21965	0.0767113	0.694258	0.122789
35_2	0.00756878	0.00575254	0.00466007	0.00236248	0.00181624		0.944562	0.440685	0.0767113	0.685864	0.503877
36	0.00240407	0.00199143	0.00220535	0.000305677	0.000198718		0.108076	0.0509781	0.0884869	0.0383439	0.0195895
37_1	0.00206637	0.00133759	0.00220535	0.000294903	-0.000138979		0.0936565	0.0378899	0.0884869	0.0304681	0.00516955
38_2	0.0088977	0.00830923	0.00649643	0.00149486	0.000588464		1.64228	1.21965	0.667815	0.698546	0.42263
39	0.00708106	0.00152472	0.00880753	0.00191494	-0.00172647		1.05576	0.0346553	2.46391	-0.193523	-1.40815
40	0.00221685	0.00133759	0.00199143	0.000552344	0.00022542		0.0473503	0.0378899	0.0509781	0.00291631	-0.00362783
41_1	0.00223256	0.00220535	0.00185011	0.000204833	2.7212e-05		0.0852928	0.0884869	0.0528871	0.0146058	-0.00319411
42	0.00930166	0.00674964	0.00876007	0.0015468	0.000541588		2.33446	0.504227	1.72704	1.21883	0.607428
43_1	0.00951864	0.00774965	0.00876007	0.00126378	0.000758573		2.14986	1.95585	1.72704	0.308419	0.194013
45	0.00934713	0.00674964	0.00247466	0.00473498	0.00259749		2.16389	0.504227	0.0461764	1.88869	1.65966
46_2	0.00877145	0.00681128	0.00247466	0.00412848	0.00196017		2.05493	0.346462	0.0461764	1.85861	1.70847
47_2	0.0091592	0.00774965	0.00247466	0.00404704	0.00140955		1.95126	1.95585	0.0461764	0.95025	-0.00458528
48_1	0.009295	0.00674964	0.00809837	0.001871	0.00119663		2.55797	0.504227	1.98729	1.31222	0.570685
49_1	0.00916044	0.00681128	0.00809837	0.00170562	0.00106208		2.13506	0.346462	1.98729	0.968184	0.147771
50_1	0.00930297	0.00774965	0.00809837	0.00137896	0.0012046		1.75862	1.95585	1.98729	-0.212943	-0.228663
52	0.00940975	0.00774965	0.00650845	0.0022807	0.0016601		1.38311	1.95585	0.50885	0.150766	-0.572733
53	0.00934121	0.00681128	0.00650845	0.00268134	0.00252992		1.10624	0.346462	0.50885	0.678586	0.597392
54_2	0.00732516	0.00474162	0.00247466	0.00371702	0.00258354		1.09891	0.113214	0.0461764	1.01921	0.985693
55_1	0.00760858	0.00674964	0.00474162	0.00186296	0.000858946		1.4508	0.504227	0.113214	1.14208	0.946572
56	0.00791476	0.00774965	0.00474162	0.00166913	0.000165112		1.13062	1.95585	0.113214	0.0960865	-0.82523
58	0.00900921	0.00674964	0.00681128	0.00222875	0.00219793		2.2155	0.504227	0.346462	1.79016	1.71128
60_2	0.00813796	0.00876007	0.00247466	0.00252059	-0.000622113		1.53685	1.72704	0.0461764	0.650247	-0.190183
61_1	0.00777777	0.00247466	0.00809837	0.00249126	-0.000320595		1.70048	0.0461764	1.98729	0.683745	-0.28681
62_1	0.00831021	0.00650845	0.00247466	0.00381866	0.00180176		1.37325	0.50885	0.0461764	1.09573	0.864397
63	0.00642567	0.00237792	0.00674964	0.00186189	-0.000323967		0.71391	0.053531	0.504227	0.435031	0.209683
64	0.0066438	0.00221905	0.00674964	0.00215946	-0.000105835		0.718383	0.0283705	0.504227	0.452085	0.214156
65_3	0.00723228	0.00285046	0.00674964	0.00243224	0.000482644		1.11239	0.0427635	0.504227	0.838893	0.608161
66_1	0.00536826	0.00184592	0.00640938	0.00124061	-0.00104112		0.965867	0.040374	0.876455	0.507453	0.0894121
67_1	0.00527029	0.00129907	0.00640938	0.00141607	-0.00113909		0.548228	0.0394831	0.876455	0.090259	-0.328227
68_1	0.00627595	0.00191302	0.0072923	0.00167329	-0.00101634		1.88547	0.0612082	1.86085	0.92444	0.0246213
69_2	0.00654759	0.00184592	0.0072923	0.00197849	-0.000744703		1.20827	0.040374	1.86085	0.257661	-0.652575
70_1	0.0070286	0.00182257	0.0072923	0.00247117	-0.000263698		1.39479	0.0687294	1.86085	0.430008	-0.46605
71_2	0.00735516	0.00640938	0.00359328	0.00235383	0.000945781		1.80826	0.876455	0.0950028	1.32253	0.931807
72_2	0.00199391	0.00133759	0.00185011	0.000400057	0.000143796		0.0527669	0.0378899	0.0528871	0.00737841	-0.000120232
73	0.00595296	0.00129907	0.0068544	0.00187623	-0.000901432		0.847766	0.0394831	1.02156	0.317247	-0.17379
74	0.00612688	0.00191302	0.00640938	0.00196567	-0.000282503		2.05325	0.0612082	0.876455	1.58442	1.1768
78_3	0.00369066	0.00275416	0.00349558	0.000565797	0.000195087		0.136663	0.0968359	0.115641	0.0304245	0.0210218
79	0.00314822	0.0028592	0.00203969	0.000698773	0.000289017		0.0590688	0.0952131	0.0470514	-0.0120634	-0.0361443
80_1	0.00337453	0.0028592	0.00343296	0.00022845	-5.8426e-05		0.0695141	0.0952131	0.0782995	-0.0172421	-0.025699
81_1	0.00306617	0.00211574	0.00275416	0.000631226	0.000312019		0.123049	0.0448857	0.0968359	0.0521885	0.0262134
82	0.00364967	0.00312465	0.0028592	0.000657745	0.000525022		0.114493	0.120594	0.0952131	0.00658983	-0.00610071
83_2	0.00302238	0.00245019	0.00275416	0.00042021	0.000268228		0.104619	0.0676282	0.0968359	0.022387	0.00778312
84_1	0.00340909	0.00322127	0.0028592	0.000368853	0.000187819		0.111137	0.0838522	0.0952131	0.0216042	0.0159238
85_2	0.00372151	0.00349558	0.00282003	0.000563703	0.00022593		0.127142	0.115641	0.0663656	0.0361389	0.011501
86_2	0.00399919	0.00349558	0.00224506	0.00112886	0.000503609		0.168597	0.115641	0.0581924	0.0816804	0.052956
87	0.00407466	0.00349558	0.00364988	0.000501932	0.00042478		0.159718	0.115641	0.123543	0.0401256	0.0361747
88	0.00332766	0.00211574	0.00349558	0.000521998	-0.000167918		0.114193	0.0448857	0.115641	0.0339298	-0.00144804
89_2	0.00426437	0.0034633	0.00349558	0.000784929	0.00076879		0.175023	0.104707	0.115641	0.0648487	0.0593816
90	0.00359675	0.00277025	0.00349558	0.000463832	0.00010117		0.138162	0.0856964	0.115641	0.0374928	0.0225203
91	0.0038626	0.0031105	0.00349558	0.000559562	0.000367025		0.161848	0.100611	0.115641	0.0537219	0.0462069
92_1	0.00331396	0.00277025	0.00275416	0.000551751	0.000543703		0.13406	0.0856964	0.0968359	0.0427938	0.0372241
93	0.00319937	0.00282003	0.00224506	0.00066682	0.000379338		0.0815165	0.0663656	0.0581924	0.0192375	0.015151
94	0.0037848	0.00282003	0.00364988	0.000549848	0.000134922		0.106525	0.0663656	0.123543	0.0115706	-0.0170182
95_1	0.00313657	0.00211574	0.00282003	0.000668686	0.000316543		0.139083	0.0448857	0.0663656	0.0834573	0.0727173
96_2	0.00384511	0.0034633	0.00282003	0.000703448	0.000381814		0.166053	0.104707	0.0663656	0.080517	0.0613463
97	0.00279785	0.00245019	0.00282003	0.000162735	-2.2183e-05		0.0962946	0.0676282	0.0663656	0.0292978	0.0286665
98	0.00239586	0.00211574	0.00224506	0.000215455	0.000150794		0.0763632	0.0448857	0.0581924	0.0248241	0.0181707
99	0.00307479	0.0034633	0.00224506	0.000220611	-0.000388506		0.0905227	0.104707	0.0581924	0.00907296	-0.0141843
100	0.0025334	0.00245019	0.00224506	0.00018577	8.3205e-05		0.0665584	0.0676282	0.0581924	0.00364813	-0.00106974
101	0.00295875	0.0031105	0.00224506	0.000280967	-0.000151752		0.0762975	0.100611	0.0581924	-0.00310443	-0.0243139
102_4	0.00336444	0.00277025	0.00364988	0.000154376	-0.000285438		0.112476	0.0856964	0.123543	0.00785663	-0.0110668
103_2	0.00282699	0.00245019	0.00364988	-0.00022305	-0.000822894		0.101328	0.0676282	0.123543	0.0057423	-0.0222152
104_1	0.00339618	0.0031105	0.00364988	1.5989e-05	-0.0002537		0.111709	0.100611	0.123543	-0.000368141	-0.011834
105	0.00232708	0.00211574	0.0034633	-0.000462444	-0.00113622		0.0480846	0.0448857	0.104707	-0.0267118	-0.0566224
106_2	0.00225635	0.00211574	0.00277025	-0.000186648	-0.000513903		0.0487032	0.0448857	0.0856964	-0.0165878	-0.0369932
107	0.00295905	0.0034633	0.00277025	-0.000157723	-0.000504246		0.0771863	0.104707	0.0856964	-0.0180154	-0.0275207
108_2	0.00326877	0.0034633	0.0031105	-1.8134e-05	-0.000194532		0.0591669	0.104707	0.100611	-0.0434923	-0.0455401
109	0.00275585	0.00277025	0.00245019	0.000145631	-1.4398e-05		0.0756641	0.0856964	0.0676282	-0.000998125	-0.0100322
110_2	0.00315224	0.00277025	0.0031105	0.000211867	4.1742e-05		0.105528	0.0856964	0.100611	0.0123744	0.00491685
111	0.00310804	0.00245019	0.0031105	0.000327695	-2.46e-06		0.0735452	0.0676282	0.100611	-0.0105746	-0.0270662
112_3	0.00376891	0.00224506	0.00364988	0.000821437	0.000119029		0.106567	0.0581924	0.123543	0.0156991	-0.0169763
113	0.00315135	0.00300878	0.00254743	0.000373246	0.000142575		0.0927222	0.0802018	0.0787821	0.0132303	0.0125204
114_3	0.00384777	0.0034633	0.00364988	0.000291179	0.000197888		0.15657	0.104707	0.123543	0.0424449	0.0330268
115_1	0.00247234	0.00211574	0.00245019	0.000189372	2.2147e-05		0.0558363	0.0448857	0.0676282	-0.000420609	-0.0117919
116	0.00284424	0.00211574	0.0031105	0.000231116	-0.000266264		0.079846	0.0448857	0.100611	0.00709748	-0.0207654
117	0.0031166	0.0034633	0.00245019	0.000159853	-0.000346699		0.0830221	0.104707	0.0676282	-0.00314553	-0.0216849
118	0.00372791	0.00277025	0.00282003	0.000932769	0.00090788		0.120759	0.0856964	0.0663656	0.044728	0.0350626
119	0.00319707	0.00275416	0.00282003	0.000409977	0.00037704		0.091631	0.0968359	0.0663656	0.0100302	-0.00520495
120_1	0.00394637	0.0031105	0.00282003	0.000981102	0.000835865		0.133234	0.100611	0.0663656	0.0497459	0.0326229
121_4	0.00296224	0.00211574	0.00364988	7.94265e-05	-0.000687642		0.0983047	0.0448857	0.123543	0.0140903	-0.0252384
122	0.00253666	0.00211574	0.00218625	0.000385669	0.000350418		0.0567098	0.0448857	0.0411945	0.0136697	0.0118241
123	0.00355005	0.0034633	0.00218625	0.000725277	8.675e-05		0.0941581	0.104707	0.0411945	0.0212074	-0.0105489
124	0.00402508	0.00245019	0.00349558	0.0010522	0.000529504		0.139863	0.0676282	0.115641	0.0482282	0.0242215
125_1	0.00353974	0.00275416	0.00218625	0.00106954	0.000785583		0.0890386	0.0968359	0.0411945	0.0200234	-0.00779735
126	0.00365465	0.00282003	0.00218625	0.00115151	0.000834618		0.145849	0.0663656	0.0411945	0.0920692	0.0794836
127	0.0022202	0.00224506	0.00218625	4.5485e-06	-2.4861e-05		0.0653829	0.0581924	0.0411945	0.0156895	0.00719049
128	0.00342697	0.00285135	0.00299707	0.000502763	0.000429903		0.107394	0.0878237	0.105399	0.0107829	0.0019951
129	0.00459421	0.00285135	0.0049532	0.000691934	-0.000358991		0.225912	0.0878237	0.37365	-0.00482446	-0.147737
130_2	0.00438634	0.00285135	0.00536936	0.000275992	-0.000983012		0.22124	0.0878237	0.303263	0.0256963	-0.0820234
131_2	0.00503104	0.00285135	0.00490602	0.00115235	0.000125017		0.340758	0.0878237	0.346955	0.123368	-0.00619739
132_2	0.00309821	0.00277025	0.00218625	0.000619966	0.000327962		0.11062	0.0856964	0.0411945	0.0471746	0.0249237
133	0.0046749	0.00299707	0.0049532	0.000699762	-0.000278303		0.217582	0.105399	0.37365	-0.0219426	-0.156068
134	0.00499178	0.00299707	0.00536936	0.000808563	-0.000377581		0.246926	0.105399	0.303263	0.042595	-0.056337
135	0.00462024	0.00299707	0.00490602	0.000668694	-0.000285781		0.200367	0.105399	0.346955	-0.0258103	-0.146588
136_1	0.00490665	0.00299707	0.00558332	0.000616455	-0.000676672		0.261261	0.105399	0.220964	0.0980796	0.0402974
137_3	0.00494772	0.0049532	0.00490602	1.8108e-05	-5.482e-06		0.474649	0.37365	0.346955	0.114347	0.101
138	0.00576446	0.00536936	0.00490602	0.000626768	0.000395099		0.462252	0.303263	0.346955	0.137143	0.115297
139	0.00638801	0.00536936	0.00558332	0.000911668	0.000804684		0.539264	0.303263	0.220964	0.27715	0.236
140	0.00424958	0.00349558	0.00218625	0.00140867	0.000754006		0.182463	0.115641	0.0411945	0.104045	0.0668217
141	0.00284582	0.00245019	0.00218625	0.000527602	0.000395628		0.108978	0.0676282	0.0411945	0.0545665	0.0413497
142_1	0.00351741	0.0031105	0.00218625	0.000869037	0.000406908		0.164555	0.100611	0.0411945	0.0936522	0.0639438
143	0.00547035	0.00285135	0.00558332	0.00125302	-0.000112971		0.259074	0.0878237	0.220964	0.10468	0.0381101
144_1	0.00582458	0.0049532	0.00536936	0.000663303	0.000455225		0.349095	0.37365	0.303263	0.0106388	-0.0245543
145_3	0.00596736	0.0049532	0.00558332	0.000699101	0.000384038		0.451888	0.37365	0.220964	0.154581	0.0782382
146	0.00617415	0.00285135	0.00305489	0.00322103	0.00311926		0.675601	0.0878237	0.104004	0.579687	0.571597
147_2	0.00602148	0.00285135	0.00357578	0.00280792	0.0024457		0.434532	0.0878237	0.128505	0.326367	0.306026
148_2	0.00637692	0.00285135	0.00347218	0.00321516	0.00290474		0.527972	0.0878237	0.0815555	0.443282	0.440148
149	0.00630741	0.00285135	0.00346433	0.00314957	0.00284308		0.515583	0.0878237	0.12401	0.409666	0.391573
151	0.00601028	0.00285135	0.00252577	0.00332172	0.00315893		0.447455	0.0878237	0.09622	0.355434	0.351235
152	0.00590183	0.00285135	0.00219661	0.00337786	0.00305048		0.455949	0.0878237	0.0443272	0.389874	0.368126
153	0.00615996	0.00285135	0.00300878	0.00322989	0.00315118		0.451044	0.0878237	0.0802018	0.367031	0.36322
154_2	0.00617655	0.00285135	0.00252169	0.00349004	0.0033252		0.277585	0.0878237	0.0489863	0.20918	0.189761
155_1	0.00663704	0.00299707	0.00305489	0.00361106	0.00358215		0.701043	0.105399	0.104004	0.596342	0.595644
156	0.00615576	0.00299707	0.00357578	0.00286934	0.00257998		0.533748	0.105399	0.128505	0.416796	0.405243
157_5	0.0059677	0.00299707	0.00219661	0.00337086	0.00297063		0.472797	0.105399	0.0443272	0.397934	0.367398
158	0.0065123	0.00299707	0.00347218	0.00327768	0.00304012		0.551598	0.105399	0.0815555	0.458121	0.446199
159	0.00596366	0.00299707	0.00252169	0.00320428	0.00296659		0.3561	0.105399	0.0489863	0.278907	0.2507
160_1	0.00653603	0.00299707	0.00346433	0.00330533	0.0030717		0.845206	0.105399	0.12401	0.730501	0.721196
161	0.00592981	0.00285135	0.00376632	0.00262098	0.00216349		0.394833	0.0878237	0.155826	0.273009	0.239008
162_1	0.00566795	0.00285135	0.00254743	0.00296856	0.0028166		0.446893	0.0878237	0.0787821	0.363591	0.35907
163	0.00585221	0.00299707	0.00252577	0.0030908	0.00285514		0.514454	0.105399	0.09622	0.413645	0.409055
164	0.00632639	0.00299707	0.00376632	0.0029447	0.00256007		0.586801	0.105399	0.155826	0.456188	0.430975
165	0.0066804	0.0049532	0.00305489	0.00267635	0.0017272		1.0456	0.37365	0.104004	0.80677	0.671947
166_1	0.00641083	0.0049532	0.00357578	0.00214634	0.00145763		0.867376	0.37365	0.128505	0.616299	0.493726
167	0.00624591	0.0049532	0.00254743	0.0024956	0.00129271		0.638982	0.37365	0.0787821	0.412766	0.265332
168_2	0.00586605	0.0049532	0.00252577	0.00212657	0.00091285		0.480429	0.37365	0.09622	0.245494	0.10678
169	0.00641763	0.0049532	0.00376632	0.00205787	0.00146444		0.442881	0.37365	0.155826	0.178143	0.0692314
170_2	0.00693491	0.00536936	0.00305489	0.00272279	0.00156556		0.93368	0.303263	0.104004	0.730046	0.630417
171	0.00669618	0.00536936	0.00357578	0.00222361	0.00132682		0.776872	0.303263	0.128505	0.560988	0.473609
172_3	0.00698282	0.00536936	0.00280097	0.00289766	0.00161347		0.933064	0.303263	0.0594537	0.751705	0.6298
173	0.00607208	0.00536936	0.00254743	0.00211368	0.000702719		0.632665	0.303263	0.0787821	0.441642	0.329402
174	0.00627994	0.00536936	0.00252577	0.00233238	0.000910585		0.477698	0.303263	0.09622	0.277957	0.174435
175_1	0.0064841	0.00536936	0.00376632	0.00191626	0.00111474		0.45866	0.303263	0.155826	0.229116	0.155397
176	0.00647508	0.0049532	0.00280097	0.00259799	0.00152188		0.893424	0.37365	0.0594537	0.676873	0.519775
177_2	0.00681929	0.00536936	0.00346433	0.00240245	0.00144993		0.851086	0.303263	0.12401	0.637449	0.547823
178_3	0.00684762	0.00490602	0.00347218	0.00265852	0.0019416		0.771303	0.346955	0.0815555	0.557048	0.424348
179	0.00656138	0.00490602	0.00252169	0.00284753	0.00165536		0.56801	0.346955	0.0489863	0.37004	0.221055
180_3	0.00643976	0.00329227	0.00350315	0.00304204	0.0029366		0.884397	0.102947	0.155365	0.755241	0.729032
181	0.00723825	0.00591655	0.00370389	0.00242803	0.0013217		0.818299	0.385598	0.147761	0.551619	0.4327
182_2	0.00608168	0.00388438	0.00210614	0.00308642	0.0021973		0.668882	0.185406	0.0552636	0.548547	0.483476
183_2	0.00683776	0.00388438	0.00325351	0.00326882	0.00295338		1.00487	0.185406	0.119523	0.852408	0.819466
184	0.00677693	0.00497011	0.00240828	0.00308774	0.00180682		0.766195	0.407769	0.0719199	0.52635	0.358425
185_2	0.00662978	0.00388438	0.00350315	0.00293601	0.0027454		0.918658	0.185406	0.155365	0.748273	0.733252
186_2	0.00700756	0.00173233	0.00325351	0.00451464	0.00375405		0.985864	0.0522548	0.119523	0.899975	0.866341
187	0.00663799	0.00539205	0.00223062	0.00282665	0.00124594		0.617129	0.315645	0.0670296	0.425792	0.301484
188	0.00682168	0.00497011	0.00327529	0.00269898	0.00185157		0.886184	0.407769	0.120611	0.621994	0.478415
189_2	0.00669863	0.00173233	0.00277089	0.00444701	0.00392773		0.866942	0.0522548	0.102845	0.789392	0.764096
190_2	0.00622462	0.00329227	0.00277089	0.00319304	0.00293235		0.717629	0.102947	0.102845	0.614733	0.614682
191	0.00638081	0.00419613	0.00297186	0.00279682	0.00218468		0.735254	0.230115	0.105512	0.56744	0.505139
192	0.00673656	0.00419613	0.00387718	0.00269991	0.00254043		0.709616	0.230115	0.198694	0.495212	0.479501
193	0.00680962	0.00591655	0.00227274	0.00271497	0.000893069		0.849131	0.385598	0.0881614	0.612251	0.463533
194	0.00745282	0.00591655	0.00387718	0.00255595	0.00153627		1.00105	0.385598	0.198694	0.708901	0.615449
195	0.00739886	0.00591655	0.00223062	0.00332528	0.00148232		0.982087	0.385598	0.0670296	0.755773	0.596488
196_3	0.00600714	0.00329227	0.00228091	0.00322055	0.00271487		0.631898	0.102947	0.0713262	0.544761	0.528951
197	0.00649352	0.00294024	0.00327529	0.00338576	0.00321824		0.714174	0.0957899	0.120611	0.605974	0.593563
198_1	0.00680861	0.00419613	0.00372904	0.00284603	0.00261249		1.24621	0.230115	0.158002	1.05215	1.01609
199	0.00576461	0.00591655	0.00297186	0.0013204	-0.000151942		0.383906	0.385598	0.105512	0.13835	-0.00169272
200	0.00615823	0.00419613	0.00273818	0.00269108	0.00196211		0.63482	0.230115	0.0555006	0.492012	0.404705
201	0.00627465	0.00419613	0.00227274	0.00304021	0.00207852		0.574198	0.230115	0.0881614	0.41506	0.344083
202	0.00692097	0.00591655	0.00372904	0.00209818	0.00100442		0.578374	0.385598	0.158002	0.306574	0.192776
203_1	0.00696119	0.00591655	0.00267452	0.00266565	0.00104464		0.889324	0.385598	0.100261	0.646394	0.503725
204_2	0.00648518	0.00572842	0.00277089	0.00223552	0.000756756		0.641305	0.279394	0.102845	0.450185	0.361911
205_4	0.00640022	0.00173233	0.00207978	0.00449416	0.00432044		0.735172	0.0522548	0.0651663	0.676461	0.670005
206_2	0.00634919	0.00329227	0.00210614	0.00364999	0.00305692		0.869644	0.102947	0.0552636	0.790538	0.766697
207_1	0.00899876	0.00829344	0.00697105	0.00136651	0.000705317		1.83296	1.46964	1.17607	0.510101	0.363315
209_1	0.00896886	0.00729029	0.00829344	0.001177	0.000675423		1.80443	1.21579	1.46964	0.461708	0.334785
210	0.00867107	0.00768117	0.00697105	0.00134495	0.000989894		1.5481	1.40984	1.17607	0.255146	0.138261
211_1	0.00886641	0.00830369	0.00697105	0.00122903	0.000562713		1.71866	1.46492	1.17607	0.39817	0.253747
212	0.0086205	0.00622259	0.00697105	0.00202368	0.00164945		1.52278	0.731954	1.17607	0.568768	0.34671
213	0.00476295	0.0052944	0.00697105	-0.00136977	-0.0022081		0.36744	0.240252	1.17607	-0.340721	-0.80863
214	0.00827361	0.00712488	0.00697105	0.00122564	0.00114872		1.75183	1.18276	1.17607	0.572412	0.569065
215	0.00723107	0.00729029	0.00697105	0.000100404	-5.9214e-05		1.04294	1.21579	1.17607	-0.152988	-0.17285
217_1	0.00905288	0.00830369	0.00829344	0.000754318	0.00074919		1.86593	1.46492	1.46964	0.398647	0.396285
218_1	0.00867592	0.00830369	0.00768117	0.00068349	0.000372229		1.85849	1.46492	1.40984	0.421108	0.39357
219	0.00835467	0.00768117	0.00712488	0.00095164	0.000673496		1.68751	1.40984	1.18276	0.391204	0.277666
220_2	0.00860468	0.00743347	0.00694049	0.0014177	0.00117121		2.42504	1.08237	1.13485	1.31643	1.29019
221_2	0.0083564	0.00743347	0.00624025	0.00151955	0.000922934		2.28982	1.08237	1.46555	1.01586	0.824274
222	0.0040218	0.00830369	0.0052944	-0.00277725	-0.00428189		0.212417	1.46492	0.240252	-0.640167	-1.2525
223	0.00855368	0.00830369	0.00729029	0.000756691	0.000249987		1.96211	1.46492	1.21579	0.621752	0.497191
224_2	0.00851734	0.00839373	0.00624025	0.00120035	0.000123609		2.08723	1.67572	1.46555	0.516596	0.41151
225	0.00838079	0.00622259	0.00729029	0.00162435	0.0010905		1.77944	0.731954	1.21579	0.805562	0.563641
226	0.00291056	0.00729029	0.0052944	-0.00338178	-0.00437972		0.0871983	1.21579	0.240252	-0.640825	-1.1286
227_1	0.00807949	0.00693221	0.00712488	0.00105094	0.000954608		1.63815	1.4464	1.18276	0.323571	0.191754
230	0.00802899	0.00693221	0.00697105	0.00107735	0.00105794		1.77629	1.4464	1.17607	0.465057	0.329893
232	0.0084247	0.00622259	0.00830369	0.00116156	0.000121005		1.80062	0.731954	1.46492	0.702185	0.335704
234	0.0041016	0.00622259	0.0052944	-0.0016569	-0.002121		0.249874	0.731954	0.240252	-0.236229	-0.48208
235	0.00794649	0.00622259	0.00712488	0.00127275	0.000821607		1.64859	0.731954	1.18276	0.691229	0.465824
236	0.00850946	0.00716254	0.00747545	0.00119046	0.00103401		1.70016	1.65687	1.49514	0.124161	0.043295
237	0.00813877	0.00654426	0.00716254	0.00128536	0.000976227		1.43377	1.1198	1.65687	0.0454309	-0.223104
238_1	0.00880692	0.00790986	0.00716254	0.00127072	0.000897055		1.66988	1.62401	1.65687	0.0294419	0.0130145
239_2	0.0083766	0.00755116	0.00732473	0.000938653	0.000825434		2.02607	1.6101	2.06554	0.188244	-0.0394757
240	0.00848682	0.00823433	0.00716254	0.000788386	0.000252489		1.91257	1.37341	1.65687	0.397436	0.255705
241_2	0.00810489	0.00732473	0.00367895	0.00260305	0.000780164		1.68011	2.06554	0.0950574	0.599809	-0.385434
242_2	0.00855005	0.00676037	0.00757615	0.0013818	0.000973904		2.49246	1.14087	1.81677	1.01364	0.675691
243_4	0.00867171	0.00840044	0.00757615	0.000683412	0.000271267		2.52098	2.08097	1.81677	0.572112	0.440013
244_1	0.00757513	0.00823433	0.00747545	-0.000279756	-0.000659199		1.45579	1.37341	1.49514	0.0215143	-0.0393508
245_2	0.00805956	0.00755116	0.00757615	0.000495906	0.000483413		2.17815	1.6101	1.81677	0.46471	0.361378
246	0.00841645	0.00801761	0.00794423	0.000435529	0.000398838		2.37372	1.65701	1.45227	0.819072	0.716701
247_3	0.008653	0.00732473	0.00771261	0.00113433	0.000940388		2.13794	2.06554	1.44948	0.38043	0.0724003
248_2	0.00865941	0.00771261	0.00757615	0.00101503	0.0009468		2.09037	1.44948	1.81677	0.457246	0.273603
249_2	0.00917679	0.00732473	0.00826014	0.00138435	0.000916649		1.99901	2.06554	1.72618	0.103148	-0.0665362
250_2	0.00861835	0.00743347	0.00732473	0.00123925	0.00118488		2.17369	1.08237	2.06554	0.599731	0.108147
251	0.00851618	0.00871994	0.00772315	0.000294635	-0.000203762		2.45646	1.77124	2.49258	0.32455	-0.0361216
252_2	0.0085526	0.00633895	0.00732473	0.00172076	0.00122788		2.21845	0.689415	2.06554	0.840974	0.15291
253	0.00589409	0.00772315	0.00572256	-0.000828767	-0.00182906		0.374672	2.49258	0.282791	-1.01302	-2.11791
254	0.0084631	0.00772315	0.00744604	0.000878499	0.000739945		2.4446	2.49258	1.36515	0.515732	-0.0479841
255_2	0.00907757	0.00694049	0.00732473	0.00194496	0.00175284		2.24675	1.13485	2.06554	0.646554	0.181205
256	0.00840444	0.00771481	0.00750862	0.000792717	0.000689622		2.04369	2.16989	1.42735	0.245071	-0.126197
257	0.00842061	0.00871994	0.00771481	0.000203228	-0.000299337		2.41859	1.77124	2.16989	0.448026	0.248702
258_2	0.00643874	0.00633895	0.00757615	-0.000518811	-0.00113741		2.18103	0.689415	1.81677	0.927933	0.364256
259	0.0085769	0.007242	0.00771481	0.00109849	0.000862086		2.27851	1.40178	2.16989	0.492675	0.108623
260	0.00855048	0.00748776	0.00772315	0.000945025	0.000827331		2.22421	2.08996	2.49258	-0.0670593	-0.268372
261_2	0.00814319	0.00624025	0.00757615	0.00123499	0.000567039		2.38488	1.46555	1.81677	0.743724	0.568115
262_1	0.00871474	0.00771481	0.00868223	0.000516214	3.2504e-05		2.4227	2.16989	2.45471	0.110397	-0.0320147
263	0.00892541	0.00669341	0.00868223	0.00123759	0.000243177		2.3463	1.20477	2.45471	0.516561	-0.10841
264	0.00870472	0.00669341	0.00750862	0.0016037	0.0011961		2.24181	1.20477	1.42735	0.92575	0.814458
265	0.0089628	0.00836844	0.00669341	0.00143187	0.000594356		2.42287	1.857	1.20477	0.891988	0.565871
266	0.00911302	0.00871994	0.00669341	0.00140635	0.00039308		2.38835	1.77124	1.20477	0.900344	0.617108
267_1	0.00853705	0.00669341	0.00744604	0.00146732	0.00109101		2.08258	1.20477	1.36515	0.797617	0.717426
269_2	0.00894286	0.00840044	0.00826014	0.00061257	0.000542419		2.48748	2.08097	1.72618	0.583909	0.406513
270	0.0086802	0.00816865	0.00750862	0.000841561	0.00051155		1.96182	2.3114	1.42735	0.092447	-0.349578
271	0.00847184	0.00652414	0.00816865	0.00112545	0.000303194		2.24108	0.796248	2.3114	0.687253	-0.0703241
272	0.00859782	0.00816865	0.00744604	0.000790477	0.000429175		2.4563	2.3114	1.36515	0.618027	0.144902
273	0.00889195	0.007242	0.00816865	0.00118663	0.000723308		2.54161	1.40178	2.3114	0.685021	0.230212
274	0.00643803	0.00748776	0.00669341	-0.000652553	-0.00104973		2.10087	2.08996	1.20477	0.453508	0.0109137
275_2	0.00890886	0.00840558	0.00826014	0.000575998	0.000503278		2.46581	2.12214	1.72618	0.541651	0.343671
276	0.00865195	0.00794423	0.00868223	0.000338716	-3.0286e-05		2.20886	1.45227	2.45471	0.255365	-0.245854
277_3	0.00870479	0.00755116	0.00826014	0.000799139	0.000444653		2.28154	1.6101	1.72618	0.613403	0.555367
278_2	0.00855728	0.00367895	0.00826014	0.00258774	0.000297144		2.19826	0.0950574	1.72618	1.28764	0.472082
279	0.00871783	0.00832414	0.00750862	0.000801446	0.000393689		2.19412	2.12023	1.42735	0.420328	0.0738904
280_1	0.00854283	0.00794423	0.00750862	0.000816399	0.000598596		2.09986	1.45227	1.42735	0.660043	0.647583
281	0.00698961	0.00801761	0.00750862	-0.000773509	-0.001028		0.67981	1.65701	1.42735	-0.862374	-0.977205
282	0.0088716	0.00836844	0.00794423	0.000715268	0.000503162		2.31729	1.857	1.45227	0.662655	0.46029
283	0.00858695	0.00836844	0.00801761	0.000393926	0.00021851		2.27704	1.857	1.65701	0.520029	0.420036
284	0.0082371	0.00836844	0.00426992	0.00191792	-0.000131337		2.03128	1.857	0.108471	1.04854	0.174276
285_2	0.00872397	0.00839373	0.00840558	0.000324312	0.000318388		2.50931	1.67572	2.12214	0.610383	0.387178
286	0.00903663	0.00871994	0.00794423	0.000704542	0.000316685		2.46561	1.77124	1.45227	0.853858	0.694375
287	0.00891345	0.00871994	0.00801761	0.000544676	0.000193509		2.24784	1.77124	1.65701	0.533709	0.476597
288	0.00861439	0.00652414	0.00794423	0.0013802	0.000670161		2.44665	0.796248	1.45227	1.32239	0.994374
289	0.00849883	0.00652414	0.00801761	0.00122795	0.000481218		2.26005	0.796248	1.65701	1.03341	0.603031
290	0.00512351	0.00832414	0.00572256	-0.00189984	-0.00320063		0.6999	2.12023	0.282791	-0.501609	-1.42033
291_2	0.00861184	0.00840558	0.00706308	0.000877514	0.000206266		2.31239	2.12214	1.26617	0.618241	0.190256
292	0.00896065	0.00744604	0.00794423	0.00126552	0.00101642		2.11442	1.36515	1.45227	0.705706	0.662145
293_1	0.00898377	0.00801761	0.00744604	0.00125194	0.000966156		2.12166	1.65701	1.36515	0.61058	0.464648
294_2	0.00898916	0.00694049	0.00771261	0.00166261	0.00127655		2.16868	1.13485	1.44948	0.876514	0.719195
295	0.00910648	0.007242	0.00801761	0.00147668	0.00108887		2.45142	1.40178	1.65701	0.922019	0.794404
296	0.00847046	0.007242	0.00426992	0.0027145	0.00122846		1.96579	1.40178	0.108471	1.21066	0.564006
297_1	0.00874271	0.00744604	0.00868223	0.000678571	6.0475e-05		2.13444	1.36515	2.45471	0.224505	-0.320275
298_3	0.00878449	0.00624025	0.00826014	0.0015343	0.000524358		2.42568	1.46555	1.72618	0.829821	0.699509
300_2	0.0086015	0.00732473	0.00395798	0.00296015	0.00127678		2.19506	2.06554	0.11856	1.103	0.129513
301_3	0.00803805	0.00633895	0.00743347	0.00115184	0.000604576		2.64802	0.689415	1.08237	1.76212	1.56564
302	0.00516751	0.00836844	0.00572256	-0.00187799	-0.00320093		0.352295	1.857	0.282791	-0.717602	-1.50471
303_2	0.00888913	0.00743347	0.00840044	0.000972172	0.000488687		2.43961	1.08237	2.08097	0.857936	0.35864
304_1	0.00886655	0.00836844	0.00832414	0.00052026	0.000498108		2.2331	1.857	2.12023	0.244486	0.112873
305_1	0.00895386	0.00871994	0.00744604	0.000870869	0.000233918		2.20404	1.77124	1.36515	0.635843	0.432799
306_1	0.00863832	0.0084653	0.00822103	0.000295153	0.00017302		2.19757	1.36115	2.18558	0.4242	0.0119855
307	0.00821535	0.00628874	0.0073792	0.00138138	0.000836158		2.03963	0.676014	1.16191	1.12066	0.877716
308	0.0080479	0.00628874	0.00726632	0.00127037	0.000781586		1.96752	0.676014	1.94398	0.657524	0.0235403
309	0.00653565	0.00726632	0.00518269	0.000311151	-0.000730665		1.03592	1.94398	0.241341	-0.0567367	-0.908056
310	0.00280235	0.00675448	0.00518269	-0.00316623	-0.00395213		0.0836114	1.24266	0.241341	-0.658388	-1.15905
311	0.00517876	0.00822103	0.00518269	-0.0015231	-0.00304227		0.276322	2.18558	0.241341	-0.937141	-1.90926
312	0.00871891	0.00861403	0.00801167	0.000406054	0.000104874		2.16319	1.98233	1.28012	0.531967	0.180865
313_2	0.008409	0.00861403	0.00675448	0.000724749	-0.000205029		2.2478	1.98233	1.24266	0.635308	0.265474
314_1	0.00843751	0.00675448	0.00801167	0.00105443	0.000425832		1.93764	1.24266	1.28012	0.676249	0.657517
315	0.00823753	0.00726632	0.00801167	0.000598536	0.000225858		2.21842	1.94398	1.28012	0.606365	0.274436
316	0.00832716	0.00822103	0.00861403	-9.03735e-05	-0.000286875		2.27755	2.18558	1.98233	0.193592	0.0919629
317_1	0.00848788	0.00822103	0.00801167	0.00037153	0.000266851		2.26296	2.18558	1.28012	0.530103	0.077372
318_1	0.00854137	0.00822103	0.0079532	0.000454251	0.000320335		2.22921	2.18558	1.51884	0.376997	0.043627
319_1	0.00821219	0.00247957	0.00834827	0.00279827	-0.000136081		1.94575	0.0711574	2.36212	0.72911	-0.41637
320_2	0.00780451	0.00247219	0.00834827	0.00239428	-0.000543763		1.63191	0.058222	2.36212	0.421745	-0.730203
321	0.0082725	0.00460424	0.00834827	0.00179625	-7.5771e-05		1.89379	0.251004	2.36212	0.587226	-0.468331
322_4	0.00854409	0.00200009	0.00834827	0.00336991	0.000195815		2.30835	0.0423568	2.36212	1.10612	-0.0537643
323	0.00760404	0.00247219	0.00776768	0.0024841	-0.000163644		1.44098	0.058222	1.45571	0.684016	-0.0147264
324_1	0.0083828	0.00460424	0.00776768	0.00219684	0.000615116		1.99932	0.251004	1.45571	1.14596	0.543613
325	0.00816393	0.00200009	0.00776768	0.00328005	0.000396249		1.9216	0.0423568	1.45571	1.17257	0.465894
326_1	0.00822368	0.00247957	0.00800028	0.00298376	0.000223398		2.07796	0.0711574	1.7726	1.15608	0.305359
327_1	0.00822473	0.00247219	0.00800028	0.00298849	0.000224444		1.74364	0.058222	1.7726	0.828228	-0.0289593
328	0.00820557	0.00460424	0.00800028	0.00190331	0.000205288		2.06427	0.251004	1.7726	1.05247	0.291676
329	0.0082118	0.00200009	0.00800028	0.00321162	0.000211519		2.54556	0.0423568	1.7726	1.63808	0.772963
330	0.00841569	0.00247957	0.0084653	0.00294325	-4.9611e-05		2.18241	0.0711574	1.36115	1.46625	0.821254
331	0.00836997	0.00247219	0.0084653	0.00290123	-9.5325e-05		1.71016	0.058222	1.36115	1.00048	0.349009
332	0.00835883	0.00460424	0.0084653	0.00182406	-0.000106469		1.88635	0.251004	1.36115	1.08027	0.525196
333	0.00862318	0.00200009	0.0084653	0.00339049	0.000157883		2.01491	0.0423568	1.36115	1.31315	0.653756
334_2	0.00846735	0.00460424	0.00734508	0.00249269	0.00112227		1.961	0.251004	1.34784	1.16158	0.613162
335	0.00761764	0.00247219	0.00628874	0.00323717	0.00132889		1.5197	0.058222	0.676014	1.15258	0.843686
336	0.00804104	0.00200009	0.00628874	0.00389663	0.0017523		2.30822	0.0423568	0.676014	1.94903	1.6322
337	0.00290189	0.00460424	0.00518269	-0.00199158	-0.0022808		0.0594715	0.251004	0.241341	-0.186701	-0.191533
338	0.000638659	0.00247219	0.00518269	-0.00318878	-0.00454403		0.0223545	0.058222	0.241341	-0.127427	-0.218987
339	0.00762469	0.00247219	0.0073792	0.00269899	0.000245494		1.3684	0.058222	1.16191	0.758337	0.206491
340	0.00785852	0.00200009	0.0073792	0.00316888	0.000479325		2.00189	0.0423568	1.16191	1.39976	0.839982
341	0.00842031	0.00460424	0.00763681	0.00229979	0.000783503		1.82361	0.251004	2.60067	0.397772	-0.777063
342	0.00823985	0.00200009	0.00763681	0.0034214	0.000603042		2.13154	0.0423568	2.60067	0.810028	-0.469131
343	0.00809755	0.00200009	0.00750866	0.00334318	0.000588892		2.1282	0.0423568	1.96644	1.1238	0.161756
344	0.0078677	0.00247219	0.00822103	0.00252109	-0.000353328		1.8258	0.058222	2.18558	0.703899	-0.359782
345_3	0.00836937	0.00200009	0.00822103	0.00325881	0.000148337		2.28756	0.0423568	2.18558	1.17359	0.101979
346	0.0061333	0.00247957	0.00628874	0.00174915	-0.000155442		0.724234	0.0711574	0.676014	0.350648	0.0482192
347	0.0081063	0.00460424	0.00628874	0.00265981	0.00181755		2.011	0.251004	0.676014	1.54749	1.33498
348_2	0.0079776	0.00200009	0.00675448	0.00360032	0.00122312		2.0092	0.0423568	1.24266	1.3667	0.766546
349	0.00753794	0.00247957	0.0073792	0.00260856	0.000158741		1.64693	0.0711574	1.16191	1.0304	0.485019
350_2	0.0079252	0.00460424	0.0073792	0.00193348	0.000546002		1.75761	0.251004	1.16191	1.05115	0.595696
351	0.00840149	0.00247957	0.00861403	0.00285469	-0.000212546		2.36104	0.0711574	1.98233	1.3343	0.378716
352_2	0.00856933	0.00460424	0.00861403	0.00196019	-4.4706e-05		1.94765	0.251004	1.98233	0.830984	-0.0346767
353	0.00805444	0.00200009	0.00861403	0.00274738	-0.00055959		2.46129	0.0423568	1.98233	1.44895	0.478968
354	0.00839516	0.00247219	0.00801167	0.00315323	0.000383486		1.72093	0.058222	1.28012	1.05176	0.44081
355_1	0.00825876	0.00460424	0.00801167	0.0019508	0.000247087		1.88458	0.251004	1.28012	1.11902	0.60446
356	0.00846544	0.00200009	0.00801167	0.00345956	0.000453764		2.23749	0.0423568	1.28012	1.57626	0.957372
357	0.00825699	0.00247957	0.0079532	0.00304061	0.00030379		2.06929	0.0711574	1.51884	1.27429	0.550448
358_4	0.00824086	0.00247219	0.0079532	0.00302816	0.000287657		1.92233	0.058222	1.51884	1.1338	0.403491
359_1	0.0086255	0.00400537	0.0080342	0.00260572	0.000591305		2.14634	0.135724	1.49185	1.33255	0.65449
360	0.00765961	0.00273078	0.00439644	0.00409601	0.00326318		1.64657	0.0665672	0.0604876	1.58304	1.58
361_3	0.00739594	0.00400537	0.00439644	0.00319504	0.00299951		1.58485	0.135724	0.0604876	1.48674	1.44912
362	0.00824908	0.00205965	0.00382283	0.00530785	0.00442625		1.94369	0.0376994	0.111075	1.86931	1.83262
363	0.00835126	0.00205965	0.00674588	0.0039485	0.00160538		2.55126	0.0376994	1.39457	1.83513	1.1567
364_2	0.00845308	0.00284729	0.00705634	0.00350127	0.00139674		2.35785	0.0955773	1.32597	1.64707	1.03188
365_3	0.00853079	0.00205965	0.00705634	0.00397279	0.00147444		2.64131	0.0376994	1.32597	1.95948	1.31534
366	0.008015	0.00302799	0.00665595	0.00317303	0.00135904		1.49244	0.11869	1.19093	0.837637	0.301519
367	0.0083318	0.00284729	0.00766115	0.00307758	0.00067065		2.02412	0.0955773	1.8097	1.07149	0.214425
368	0.00819983	0.00302799	0.00766115	0.00285526	0.000538683		1.61332	0.11869	1.8097	0.649122	-0.196382
369	0.00833364	0.0041522	0.00766115	0.00242697	0.000672498		1.91095	0.225647	1.8097	0.893275	0.10125
370	0.00823394	0.00302799	0.00674588	0.00334701	0.00148806		2.00096	0.11869	1.39457	1.24433	0.606393
371_2	0.00845109	0.0041522	0.00674588	0.00300205	0.00170521		1.93857	0.225647	1.39457	1.12846	0.544004
372_1	0.00829504	0.00302799	0.00839732	0.00258238	-0.000102285		1.92735	0.11869	2.09146	0.822279	-0.164106
373	0.0083585	0.00284729	0.00809557	0.00288707	0.000262929		2.15179	0.0955773	2.25954	0.974229	-0.107753
374_1	0.00843747	0.0041522	0.00809557	0.00231358	0.000341894		2.17808	0.225647	2.25954	0.935487	-0.0814602
375_1	0.0082219	0.00342737	0.00376078	0.00462783	0.00446112		2.14609	0.0922724	0.12123	2.03933	2.02486
376	0.00869561	0.0054293	0.00784683	0.00205754	0.000848775		2.31273	0.253939	1.73393	1.31879	0.578794
377	0.00833657	0.0054293	0.00376078	0.00374153	0.00290727		1.9655	0.253939	0.12123	1.77792	1.71156
378	0.00837109	0.0054293	0.00597116	0.00267086	0.00239993		2.20167	0.253939	0.645542	1.75193	1.55613
379_2	0.0089523	0.0054293	0.00705634	0.00270948	0.00189596		2.00851	0.253939	1.32597	1.21855	0.682538
380	0.00845156	0.00342737	0.00674588	0.00336493	0.00170568		1.78841	0.0922724	1.39457	1.04499	0.393845
381	0.00646115	0.0054293	0.00674588	0.000373558	-0.000284733		1.22903	0.253939	1.39457	0.404782	-0.165531
382	0.00852145	0.00342737	0.00784683	0.00288435	0.000674619		1.93906	0.0922724	1.73393	1.02596	0.205133
383	0.00858884	0.00342737	0.00684403	0.00345314	0.00174481		1.67212	0.0922724	0.709787	1.27109	0.96233
384	0.00821985	0.00342737	0.00597116	0.00352058	0.00224869		1.73431	0.0922724	0.645542	1.3654	1.08877
385_2	0.00791541	0.00342737	0.00450849	0.00394747	0.00340691		1.73994	0.0922724	0.162551	1.61253	1.57739
386	0.00851996	0.00342737	0.00756323	0.00302465	0.000956723		2.05923	0.0922724	1.90926	1.05846	0.149967
387	0.00837655	0.00342737	0.00809557	0.00261507	0.000280971		2.14799	0.0922724	2.25954	0.97208	-0.111555
388	0.00847042	0.00342737	0.00715643	0.00317852	0.00131398		1.89613	0.0922724	1.4225	1.13875	0.473631
389_1	0.00870193	0.00342737	0.00705634	0.00346007	0.00164559		1.96262	0.0922724	1.32597	1.2535	0.636653
390_2	0.00852027	0.00342737	0.00839732	0.00260792	0.000122945		2.11921	0.0922724	2.09146	1.02734	0.0277511
391	0.00836417	0.00342737	0.00683912	0.00323092	0.00152505		2.03554	0.0922724	1.21186	1.38347	0.823674
392	0.00800073	0.00342737	0.00382283	0.00437563	0.0041779		1.92002	0.0922724	0.111075	1.81834	1.80894
393_1	0.00853804	0.0054293	0.00684403	0.00240138	0.00169402		2.23171	0.253939	0.709787	1.74984	1.52192
394	0.0087049	0.0054293	0.00842404	0.00177823	0.000280856		1.95505	0.253939	1.48992	1.08311	0.465124
395	0.00835121	0.0054293	0.00450849	0.00338231	0.00292191		1.80844	0.253939	0.162551	1.6002	1.5545
396	0.00861565	0.0054293	0.00756323	0.00211938	0.00105242		2.30603	0.253939	1.90926	1.22443	0.39677
397_1	0.00833678	0.0054293	0.00665595	0.00229415	0.00168083		2.25334	0.253939	1.19093	1.53091	1.06242
398	0.00859874	0.0054293	0.00683912	0.00246453	0.00175962		2.33357	0.253939	1.21186	1.60066	1.1217
399	0.00870258	0.0054293	0.00715643	0.00240971	0.00154615		2.27547	0.253939	1.4225	1.43725	0.852972
400	0.00872141	0.0054293	0.00766115	0.00217619	0.00106027		1.99555	0.253939	1.8097	0.963735	0.185855
401	0.00863136	0.0054293	0.00766115	0.00208614	0.000970215		1.93546	0.253939	1.8097	0.903645	0.125766
402_1	0.00830249	0.00224429	0.00784683	0.00325693	0.000455663		1.9294	0.0907022	1.73393	1.01708	0.195469
403_2	0.00811374	0.0033603	0.00784683	0.00251018	0.000266911		1.93451	0.0946901	1.73393	1.0202	0.20058
404	0.00545902	0.0033603	0.00376078	0.00189848	0.00169824		1.57524	0.0946901	0.12123	1.46728	1.45401
405_1	0.00754854	0.0033603	0.00597116	0.00288281	0.00157738		1.87006	0.0946901	0.645542	1.49995	1.22452
406	0.00808662	0.00236396	0.00842404	0.00269262	-0.000337424		2.02384	0.0321753	1.48992	1.2628	0.533923
407	0.00801125	0.0033603	0.00766115	0.00250053	0.000350107		1.94423	0.0946901	1.8097	0.992034	0.13453
408_1	0.00840085	0.00224429	0.00756323	0.00349708	0.000837613		1.97335	0.0907022	1.90926	0.973371	0.06409
409_2	0.00800867	0.00224429	0.00683912	0.00346696	0.00116955		1.64078	0.0907022	1.21186	0.989494	0.428913
410_1	0.00782556	0.00224429	0.00382283	0.004792	0.00400273		1.44804	0.0907022	0.111075	1.34715	1.33697
411_2	0.00783658	0.00332442	0.00746534	0.0024417	0.000371246		2.22213	0.116408	2.12484	1.1015	0.0972841
412_1	0.00797427	0.00332442	0.00744836	0.00258788	0.000525913		1.69202	0.116408	1.6845	0.791562	0.0075139
413	0.00790819	0.00332442	0.00733462	0.00257867	0.000573567		1.60121	0.116408	1.43006	0.827975	0.171147
414	0.00771387	0.00332442	0.00401795	0.00404268	0.00369592		1.78054	0.116408	0.116301	1.66418	1.66413
415	0.00804582	0.00229721	0.00746534	0.00316455	0.000580487		2.44415	0.0497406	2.12484	1.35686	0.319309
416	0.00806164	0.00229721	0.00750239	0.00316184	0.000559255		2.25027	0.0497406	1.99921	1.22579	0.251058
417	0.00783471	0.00229721	0.00733462	0.0030188	0.00050009		1.66707	0.0497406	1.43006	0.927169	0.237007
418	0.00506173	0.00270732	0.00354679	0.00193468	0.00151494		0.357582	0.0599718	0.0392153	0.307989	0.297611
419_1	0.00792548	0.00228091	0.00746534	0.00305236	0.000460146		1.97779	0.0713262	2.12484	0.879701	-0.147058
420	0.00805636	0.00228091	0.00750239	0.00316471	0.000553968		1.93524	0.0713262	1.99921	0.899973	-0.0639673
421	0.00821421	0.00228091	0.00831164	0.00291794	-9.7422e-05		1.88635	0.0713262	2.51294	0.594218	-0.62659
422	0.00831844	0.00228091	0.00832948	0.00301325	-1.1039e-05		1.60945	0.0713262	2.33687	0.405348	-0.727424
423_2	0.00820824	0.00228091	0.00744836	0.0033436	0.000759876		1.51956	0.0713262	1.6845	0.641643	-0.164946
424	0.00797377	0.00228091	0.00733462	0.003166	0.00063915		1.26434	0.0713262	1.43006	0.513644	-0.165725
425	0.00774564	0.00228091	0.00401795	0.0045962	0.00372768		1.05003	0.0713262	0.116301	0.956214	0.933727
426_1	0.00815168	0.00216309	0.00831164	0.00291432	-0.000159958		2.16069	0.0556834	2.51294	0.876375	-0.352254
427_3	0.00829096	0.00207666	0.00840558	0.00304984	-0.000114619		1.74675	0.0850091	2.12214	0.643182	-0.375381
428_2	0.00798644	0.00303923	0.00676037	0.00308664	0.00122607		1.97212	0.103314	1.14087	1.35002	0.831243
429	0.00826595	0.00303923	0.00757615	0.00295826	0.000689802		2.23995	0.103314	1.81677	1.27991	0.423181
430_2	0.00828985	0.00303923	0.00840044	0.00257001	-0.00011059		2.19282	0.103314	2.08097	1.10068	0.11185
431_1	0.00837571	0.00303923	0.00840558	0.00265331	-2.9866e-05		2.09697	0.103314	2.12214	0.984244	-0.025166
432_1	0.0080834	0.00303923	0.00755116	0.00278821	0.000532239		1.68755	0.103314	1.6101	0.830839	0.0774448
433	0.00814444	0.00303923	0.00771261	0.00276852	0.000431833		1.58907	0.103314	1.44948	0.812667	0.139583
434_4	0.0082285	0.00303923	0.00367895	0.00486941	0.00454955		1.6464	0.103314	0.0950574	1.54722	1.54309
435_2	0.008196	0.00236709	0.00732473	0.00335009	0.000871272		2.0206	0.0644354	2.06554	0.955608	-0.0449463
436_1	0.00793488	0.00207978	0.00750239	0.0031438	0.000432489		1.93741	0.0651663	1.99921	0.905224	-0.0617962
437	0.00823874	0.00207978	0.00831164	0.00304303	-7.29e-05		1.85304	0.0651663	2.51294	0.563989	-0.659899
438_2	0.00811203	0.00207978	0.00744836	0.00334796	0.000663665		1.75833	0.0651663	1.6845	0.883496	0.073827
439	0.00793544	0.00207978	0.00733462	0.00322824	0.000600816		1.68145	0.0651663	1.43006	0.933831	0.251382
440	0.00796754	0.00350315	0.00673212	0.00284991	0.00123542		2.25381	0.155365	1.25325	1.5495	1.00056
441	0.00820519	0.00350315	0.00750239	0.00270242	0.000702805		2.27047	0.155365	1.99921	1.19318	0.271262
442_1	0.00834119	0.00350315	0.00831164	0.00243379	2.9551e-05		2.49335	0.155365	2.51294	1.1592	-0.0195918
443_2	0.00829158	0.00350315	0.00832948	0.00237526	-3.7905e-05		2.06144	0.155365	2.33687	0.815327	-0.275426
444	0.00851517	0.00350315	0.00744836	0.00303941	0.00106681		1.63061	0.155365	1.6845	0.710675	-0.0538939
445_1	0.00833115	0.00350315	0.00733462	0.00291227	0.000996532		1.5324	0.155365	1.43006	0.739681	0.102331
447	0.00837894	0.00173529	0.00772315	0.00364972	0.000655787		2.06819	0.0447946	2.49258	0.799503	-0.424391
448_1	0.00803371	0.00173529	0.00669341	0.00381936	0.0013403		1.97641	0.0447946	1.20477	1.35163	0.771641
449	0.00427908	0.00173529	0.00816865	-0.000672891	-0.00388957		0.167551	0.0447946	2.3114	-1.01055	-2.14385
450	0.00811729	0.00355875	0.00772315	0.00247633	0.000394136		2.14954	0.1257	2.49258	0.840394	-0.343047
451	0.00808167	0.00355875	0.00669341	0.00295559	0.00138826		2.20227	0.1257	1.20477	1.53704	0.997504
452	0.00835672	0.00355875	0.00832414	0.00241527	3.2577e-05		1.99081	0.1257	2.12023	0.867847	-0.129416
453	0.0080069	0.00198368	0.00772315	0.00315349	0.000283755		2.15713	0.0572947	2.49258	0.882194	-0.33545
454	0.00801538	0.00198368	0.00669341	0.00367684	0.00132197		2.12396	0.0572947	1.20477	1.49293	0.91919
455_2	0.00847609	0.00198368	0.00816865	0.00339993	0.000307447		2.28024	0.0572947	2.3114	1.09589	-0.031162
456_2	0.00841058	0.00198368	0.00801761	0.00340993	0.000392966		1.84126	0.0572947	1.65701	0.984103	0.184243
457_2	0.00815784	0.00198368	0.00794423	0.00319388	0.000213606		1.54604	0.0572947	1.45227	0.791252	0.0937622
458_1	0.00819205	0.00198368	0.00426992	0.00506525	0.00392212		1.48849	0.0572947	0.108471	1.40561	1.38002
459_1	0.00844571	0.0035626	0.00801761	0.00265561	0.000428105		2.00039	0.155381	1.65701	1.09419	0.343376
460_1	0.00817925	0.0035626	0.00794423	0.00242583	0.000235018		1.90547	0.155381	1.45227	1.10164	0.453193
461	0.00822809	0.0035626	0.00426992	0.00431182	0.00395816		1.55982	0.155381	0.108471	1.4279	1.40444
462	0.00817185	0.00311977	0.00741408	0.00290492	0.000757764		2.05146	0.103141	2.24148	0.879147	-0.190023
463_3	0.00872874	0.00311977	0.00794152	0.0031981	0.000787219		2.04896	0.103141	2.00931	0.992738	0.0396531
464	0.00803807	0.0012149	0.00418513	0.00533806	0.00385294		1.14234	0.0431559	0.100209	1.07066	1.04213
465	0.00776917	0.00326456	0.00817747	0.00204815	-0.000408301		2.27646	0.122287	2.30103	1.0648	-0.0245714
466_4	0.00830956	0.00319205	0.00836844	0.00252931	-5.8885e-05		1.97318	0.141091	1.857	0.974131	0.116175
467_1	0.00828065	0.00319205	0.00871994	0.00232465	-0.000439291		2.19145	0.141091	1.77124	1.23528	0.420209
468_1	0.00838969	0.00319205	0.007242	0.00317266	0.00114769		2.46098	0.141091	1.40178	1.68954	1.0592
469	0.00806643	0.00385979	0.00871994	0.00177656	-0.000653515		2.08539	0.192598	1.77124	1.10348	0.314154
470_2	0.00826497	0.00385979	0.007242	0.00271407	0.00102296		2.30368	0.192598	1.40178	1.50649	0.901899
471	0.00839031	0.00286044	0.00868223	0.00261898	-0.00029192		2.26219	0.0853859	2.45471	0.992143	-0.192519
472_1	0.00829075	0.00286044	0.00836844	0.00267631	-7.7688e-05		2.1489	0.0853859	1.857	1.1777	0.291897
473	0.00799237	0.00252996	0.00868223	0.00238627	-0.000689867		1.85825	0.0844194	2.45471	0.588683	-0.596462
474_2	0.00831371	0.00252996	0.00836844	0.00286451	-5.4729e-05		1.72299	0.0844194	1.857	0.752276	-0.134015
475_1	0.00810397	0.00252996	0.00871994	0.00247901	-0.000615977		1.7476	0.0844194	1.77124	0.81977	-0.0236404
476_2	0.00812154	0.00252996	0.00744604	0.00313353	0.000675495		1.71487	0.0844194	1.36515	0.990083	0.349717
477	0.00805043	0.00252996	0.007242	0.00316445	0.00080843		2.18778	0.0844194	1.40178	1.44468	0.785996
478_1	0.0079401	0.00173529	0.00750862	0.00331815	0.000431478		1.77037	0.0447946	1.42735	1.0343	0.343022
479	0.0081657	0.00173529	0.00871994	0.00293808	-0.000554244		1.93415	0.0447946	1.77124	1.02614	0.162915
480	0.00794369	0.00173529	0.00652414	0.00381397	0.00141955		1.94693	0.0447946	0.796248	1.52641	1.15069
481_2	0.00797202	0.00355875	0.00744604	0.00246962	0.000525975		1.9486	0.1257	1.36515	1.20317	0.583447
482_3	0.00846831	0.00355875	0.007242	0.00306793	0.0012263		2.38678	0.1257	1.40178	1.62303	0.984992
483_2	0.00824398	0.00355875	0.00868223	0.00212349	-0.000438251		2.01461	0.1257	2.45471	0.724402	-0.440103
484_1	0.0086918	0.00355875	0.00836844	0.0027282	0.000323356		2.14289	0.1257	1.857	1.15154	0.285888
485	0.00813477	0.00355875	0.00871994	0.00199542	-0.000585179		1.95953	0.1257	1.77124	1.01106	0.188294
486	0.00797968	0.00198368	0.00868223	0.00264673	-0.000702551		1.91535	0.0572947	2.45471	0.659343	-0.539365
487	0.00828955	0.00198368	0.00836844	0.00311349	-7.8892e-05		2.14293	0.0572947	1.857	1.18578	0.285927
488	0.00809818	0.00198368	0.00871994	0.00274637	-0.000621764		1.94656	0.0572947	1.77124	1.03229	0.175317
489	0.0078003	0.00198368	0.00744604	0.00308544	0.000354259		1.62013	0.0572947	1.36515	0.908911	0.254983
490_2	0.00807217	0.0035626	0.00744604	0.00256784	0.000626125		1.9841	0.155381	1.36515	1.22384	0.618951
491_2	0.00857276	0.0035626	0.007242	0.00317046	0.00133076		2.37843	0.155381	1.40178	1.59985	0.976648
492	0.00847908	0.0035626	0.00750862	0.00294347	0.000970458		1.94606	0.155381	1.42735	1.15469	0.518707
493	0.00854389	0.0035626	0.00836844	0.00257837	0.000175449		1.97531	0.155381	1.857	0.96912	0.11831
494_3	0.00866978	0.0035626	0.00871994	0.00252851	-5.0165e-05		2.032	0.155381	1.77124	1.06869	0.260758
495	0.00837399	0.00297161	0.00834827	0.00271404	2.5713e-05		1.8016	0.114963	2.36212	0.563062	-0.560516
496_1	0.0081587	0.00297161	0.00776768	0.00278906	0.000391021		1.97268	0.114963	1.45571	1.18735	0.516978
497	0.00837034	0.00297161	0.0084653	0.00265189	-9.4957e-05		1.77814	0.114963	1.36115	1.04008	0.416985
498	0.00209259	0.00297161	0.00518269	-0.00198456	-0.00309009		0.0531855	0.114963	0.241341	-0.124966	-0.188156
499	0.0077861	0.00297161	0.0073792	0.0026107	0.000406905		1.74734	0.114963	1.16191	1.1089	0.585427
500	0.00802723	0.00297161	0.00734508	0.00286889	0.000682155		2.16589	0.114963	1.34784	1.43449	0.818049
501_2	0.00797048	0.00202062	0.00834827	0.00278604	-0.000377789		1.81983	0.0603717	2.36212	0.608583	-0.54229
502	0.00788772	0.00202062	0.00776768	0.00299357	0.00012004		1.99723	0.0603717	1.45571	1.2392	0.541528
503	0.00849157	0.00202062	0.00800028	0.00348112	0.000491291		1.86536	0.0603717	1.7726	0.948874	0.0927611
504	0.00783155	0.00202062	0.00628874	0.00367687	0.00154281		2.02727	0.0603717	0.676014	1.65907	1.35125
505	0.00827132	0.00351052	0.00834827	0.00234192	-7.6956e-05		2.03324	0.14918	2.36212	0.777588	-0.328881
506_2	0.00588038	0.00351052	0.00776768	0.000241277	-0.00188731		0.495581	0.14918	1.45571	-0.306861	-0.960124
507	0.00732398	0.00351052	0.00800028	0.00156858	-0.000676306		1.63146	0.14918	1.7726	0.670571	-0.141138
508_2	0.00818488	0.00351052	0.0084653	0.00219697	-0.000280419		2.06926	0.14918	1.36115	1.31409	0.708101
509_1	0.00757484	0.00351052	0.00628874	0.00267521	0.0012861		2.20755	0.14918	0.676014	1.79496	1.53154
510	0.00427669	0.00351052	0.00518269	-6.9916e-05	-0.000906		0.246427	0.14918	0.241341	0.0511662	0.00508529
511_3	0.00800895	0.00351052	0.0073792	0.0025641	0.000629758		1.77436	0.14918	1.16191	1.11881	0.612448
512_2	0.00826772	0.00351052	0.00734508	0.00283992	0.000922645		2.29271	0.14918	1.34784	1.5442	0.944868
513	0.00798441	0.00202062	0.00726632	0.00334094	0.000718093		2.09415	0.0603717	1.94398	1.09197	0.150166
514	0.00781499	0.00351052	0.00726632	0.00242657	0.00054867		2.54273	0.14918	1.94398	1.49615	0.598745
515_2	0.00803873	0.00292099	0.00726632	0.00294507	0.000772412		2.28875	0.123639	1.94398	1.25494	0.344774
516	0.00816717	0.00263686	0.00726632	0.00321558	0.000900849		2.47849	0.0795949	1.94398	1.46671	0.534513
517	0.00816571	0.00309994	0.00726632	0.00298258	0.000899393		2.21683	0.102736	1.94398	1.19347	0.272846
518_2	0.00816151	0.00188224	0.00726632	0.00358723	0.000895189		1.98866	0.0508163	1.94398	0.99126	0.0446778
519	0.00738672	0.00427445	0.008567	0.000965997	-0.00118028		2.08805	0.269503	2.35371	0.77644	-0.265661
520	0.00718953	0.00428293	0.0062828	0.00190667	0.000906738		2.24337	0.291722	0.740501	1.72726	1.50287
522_1	0.00842909	0.008567	0.00807234	0.000109428	-0.0001379		2.70679	2.35371	2.19652	0.431672	0.353079
523	0.0082943	0.008567	0.0076869	0.000167356	-0.000272694		2.66297	2.35371	2.70178	0.13522	-0.0388182
524_1	0.00833466	0.0062828	0.0082448	0.00107087	8.9864e-05		2.86028	0.740501	2.50344	1.23831	0.356838
525	0.00818849	0.0082448	0.00807234	2.9924e-05	-5.6306e-05		3.19252	2.50344	2.19652	0.842534	0.689072
526_3	0.00834909	0.0082448	0.0076869	0.000383241	0.00010429		3.17805	2.50344	2.70178	0.575437	0.476268
527	0.00819282	0.0062828	0.00807234	0.00101525	0.00012048		2.8107	0.740501	2.19652	1.34219	0.61418
528	0.00848274	0.0076869	0.00807234	0.000603121	0.000410399		2.88485	2.70178	2.19652	0.435703	0.183071
529	0.00437749	0.00427445	0.00428293	9.88025e-05	9.4561e-05		0.269714	0.269503	0.291722	-0.010899	-0.0220083
530	0.00588321	0.00292099	0.00427445	0.00228549	0.00160876		0.946549	0.123639	0.269503	0.749978	0.677046
531_2	0.00622744	0.00309994	0.00427445	0.00254025	0.00195299		0.989906	0.102736	0.269503	0.803786	0.720402
532	0.00416416	0.00335876	0.00427445	0.000347558	-0.000110289		0.307287	0.125692	0.269503	0.10969	0.0377841
533	0.00414887	0.00202062	0.00427445	0.00100133	-0.000125581		0.192763	0.0603717	0.269503	0.0278259	-0.07674
534	0.00622956	0.00351052	0.00427445	0.00233708	0.00195512		0.894633	0.14918	0.269503	0.685292	0.62513
535	0.00579605	0.00119069	0.00428293	0.00305924	0.00151312		0.637626	0.0450577	0.291722	0.469236	0.345904
536	0.00592544	0.00309994	0.00428293	0.00223401	0.00164251		0.931563	0.102736	0.291722	0.734334	0.639841
537	0.00603134	0.00188224	0.00428293	0.00294876	0.00174841		0.600132	0.0508163	0.291722	0.428863	0.30841
538	0.00624683	0.00202062	0.00428293	0.00309505	0.0019639		0.76621	0.0603717	0.291722	0.590163	0.474488
539_1	0.00616758	0.00247957	0.00427445	0.00279057	0.00189313		1.64623	0.0711574	0.269503	1.4759	1.37673
540	0.00653357	0.00460424	0.00427445	0.00209423	0.00192933		2.01362	0.251004	0.269503	1.75336	1.74411
541	0.00640737	0.00413505	0.00427445	0.00220263	0.00213293		2.19101	0.190368	0.269503	1.96107	1.92151
542	0.00664211	0.00555775	0.00427445	0.00172602	0.00108437		1.90568	0.286284	0.269503	1.62778	1.61939
543	0.0043649	0.00247957	0.00428293	0.000983655	8.1972e-05		0.297526	0.0711574	0.291722	0.116087	0.00580441
544	0.00673534	0.00200009	0.00428293	0.00359383	0.0024524		1.69154	0.0423568	0.291722	1.5245	1.39982
545	0.00668625	0.00413505	0.00428293	0.00247726	0.00240331		1.66123	0.190368	0.291722	1.42019	1.36951
546	0.00803236	0.00247957	0.008567	0.00250908	-0.000534637		2.43414	0.0711574	2.35371	1.22171	0.0804314
547	0.00610503	0.00247219	0.008567	0.000585437	-0.00246196		0.631019	0.058222	2.35371	-0.574946	-1.72269
548_3	0.00843205	0.00200009	0.008567	0.00314851	-0.000134947		2.73966	0.0423568	2.35371	1.54162	0.385949
549	0.0084083	0.00413505	0.008567	0.00205728	-0.000158696		2.68306	0.190368	2.35371	1.41103	0.329357
550	0.00841048	0.00247957	0.0082448	0.0030483	0.000165683		2.8116	0.0711574	2.50344	1.5243	0.308152
551	0.00872504	0.00460424	0.0082448	0.00230052	0.000480242		2.82505	0.251004	2.50344	1.44782	0.321603
552	0.00842156	0.00413505	0.0082448	0.00223163	0.000176759		2.86975	0.190368	2.50344	1.52285	0.366308
553	0.00865445	0.00566424	0.00837876	0.00163295	0.000275699		2.70482	0.241067	2.72429	1.22215	-0.0194614
554	0.00841716	0.00265221	0.0066906	0.00374575	0.00172656		2.29209	0.0654649	0.753637	1.88253	1.53845
555_1	0.00841056	0.00457377	0.0066906	0.00277838	0.00171997		2.30694	0.229336	0.753637	1.81545	1.5533
556	0.00472534	0.00389746	0.0066906	-0.00056869	-0.00196526		0.309264	0.120814	0.753637	-0.127961	-0.444373
557_1	0.0083138	0.00566424	0.0066906	0.00213638	0.0016232		2.18904	0.241067	0.753637	1.69168	1.4354
558	0.0084148	0.00265221	0.00793165	0.00312287	0.000483149		2.38847	0.0654649	2.60167	1.0549	-0.213202
559	0.00849387	0.00457377	0.00793165	0.00224115	0.000562215		2.51841	0.229336	2.60167	1.1029	-0.083261
560_2	0.00849835	0.00219676	0.00793165	0.00343414	0.000566698		2.62908	0.0425164	2.60167	1.30699	0.0274114
561	0.00855624	0.00294428	0.00839059	0.0028888	0.000165649		2.24161	0.0886404	2.3476	1.02349	-0.105986
562	0.00862918	0.00457377	0.00839059	0.002147	0.000238589		2.36756	0.229336	2.3476	1.0791	0.0199661
563	0.00864664	0.00389746	0.00839059	0.00250261	0.00025605		2.33665	0.120814	2.3476	1.10245	-0.0109466
564_1	0.0089247	0.00566424	0.00839059	0.00189729	0.000534115		2.12338	0.241067	2.3476	0.829047	-0.224218
565	0.00804525	0.00222678	0.00882291	0.0025204	-0.000777665		2.04467	0.0765766	2.40835	0.802205	-0.363682
567_2	0.00807957	0.00277415	0.00882291	0.00228104	-0.00074334		2.40128	0.0757674	2.40835	1.15922	-0.00707281
568	0.00764342	0.00248731	0.00882291	0.00198831	-0.00117949		1.72594	0.0725878	2.40835	0.485472	-0.682409
569_4	0.00785933	0.00326456	0.00882291	0.00181559	-0.000963584		2.04133	0.122287	2.40835	0.77601	-0.367022
570_3	0.00799809	0.00222678	0.00837876	0.00269533	-0.000380662		2.6718	0.0765766	2.72429	1.27137	-0.0524807
571	0.00793279	0.00339731	0.00837876	0.00204476	-0.000445965		2.67152	0.122358	2.72429	1.2482	-0.0527677
573_3	0.00813682	0.00326456	0.00837876	0.00231517	-0.000241931		2.3243	0.122287	2.72429	0.901015	-0.399984
574	0.00804215	0.00311977	0.00837876	0.00229289	-0.000336605		2.54711	0.103141	2.72429	1.1334	-0.177174
575	0.00860864	0.00220011	0.00882291	0.00309713	-0.00021427		2.20034	0.0549786	2.40835	0.968678	-0.208008
577_1	0.00792881	0.00222678	0.0066906	0.00347012	0.00123821		2.15268	0.0765766	0.753637	1.73757	1.39904
578	0.00770711	0.00339731	0.0066906	0.00266316	0.00101651		2.43937	0.122358	0.753637	2.00137	1.68573
579	0.00770701	0.00326456	0.0066906	0.00272942	0.00101641		1.67324	0.122287	0.753637	1.23528	0.919606
580_2	0.00784768	0.00218376	0.0066906	0.0034105	0.00115708		1.90785	0.0580321	0.753637	1.50202	1.15422
581	0.00803654	0.00311977	0.0066906	0.00313135	0.00134594		2.21373	0.103141	0.753637	1.78534	1.46009
584	0.00833992	0.00218376	0.00839059	0.00305274	-5.0674e-05		2.34405	0.0580321	2.3476	1.14123	-0.00354973
585	0.00703823	0.00339731	0.00793165	0.00137375	-0.000893422		1.1155	0.122358	2.60167	-0.246508	-1.48616
586	0.00793946	0.0012149	0.00793165	0.00336619	7.812e-06		2.1641	0.0431559	2.60167	0.841683	-0.437573
587_1	0.00784586	0.00326456	0.00793165	0.00224775	-8.5793e-05		2.25039	0.122287	2.60167	0.888412	-0.351278
588	0.00815146	0.00218376	0.00793165	0.00309376	0.000219811		2.08338	0.0580321	2.60167	0.753526	-0.518292
589_1	0.00756043	0.00222678	0.00793165	0.00248121	-0.000371226		2.39302	0.0765766	2.60167	1.0539	-0.208647
590	0.00793453	0.00222678	0.00839059	0.00262584	-0.000456061		2.33932	0.0765766	2.3476	1.12724	-0.00827429
591	0.00618709	0.00339731	0.00882291	7.69825e-05	-0.00263582		1.09369	0.122358	2.40835	-0.171667	-1.31466
593	0.0080179	0.00339731	0.00839059	0.00212395	-0.000372687		2.1368	0.122358	2.3476	0.901818	-0.210801
595	0.00786944	0.00248731	0.00839059	0.00243049	-0.000521145		2.0048	0.0725878	2.3476	0.794706	-0.342799
596	0.00514114	0.0012149	0.00839059	0.000338401	-0.00324945		0.606323	0.0431559	2.3476	-0.589054	-1.74127
598_2	0.00718417	0.00208428	0.0064478	0.00291813	0.000736373		1.65732	0.0733828	0.922402	1.15943	0.734921
599	0.00747519	0.0012149	0.0064478	0.00364384	0.00102739		1.6639	0.0431559	0.922402	1.18112	0.741501
600_1	0.00813797	0.00194628	0.00867162	0.00282902	-0.000533652		1.56601	0.0446991	2.52769	0.279816	-0.96168
601_2	0.00809193	0.00194628	0.00819348	0.00302206	-0.000101544		2.44835	0.0446991	2.71241	1.0698	-0.264056
602	0.00808716	0.00287197	0.00867162	0.00231536	-0.000584459		2.54105	0.102426	2.52769	1.22599	0.0133577
604	0.00792251	0.00287197	0.00785525	0.00255889	6.7256e-05		2.32752	0.102426	2.90676	0.822923	-0.579243
605_2	0.00837967	0.00287197	0.00790383	0.00299177	0.000475843		1.97189	0.102426	2.54238	0.649486	-0.570491
606_1	0.0082756	0.00289141	0.00819348	0.00273316	8.2121e-05		2.41046	0.0980806	2.71241	1.00521	-0.30195
607_2	0.00803463	0.00289141	0.00785525	0.0026613	0.000179382		2.28359	0.0980806	2.90676	0.781166	-0.623173
608_1	0.00687032	0.00289141	0.00790383	0.0014727	-0.00103351		0.990193	0.0980806	2.54238	-0.330037	-1.55219
609_2	0.00821713	0.00231554	0.00790383	0.00310744	0.000313298		1.9805	0.0565164	2.54238	0.681053	-0.561878
610	0.00828382	0.00326769	0.00867162	0.00231416	-0.000387805		2.03018	0.137142	2.52769	0.697768	-0.497507
611_1	0.00837983	0.00326769	0.00790383	0.00279408	0.000476005		1.91242	0.137142	2.54238	0.572658	-0.62996
613	0.00805375	0.00289141	0.0064478	0.00338415	0.00160595		1.9796	0.0980806	0.922402	1.46936	1.0572
614_2	0.00764372	0.00326769	0.0064478	0.00278598	0.00119592		2.29021	0.137142	0.922402	1.76043	1.3678
615	0.00803964	0.00213219	0.00819348	0.0028768	-0.000153841		2.62752	0.045503	2.71241	1.24857	-0.0848858
617	0.00800457	0.00322804	0.00790383	0.00243864	0.00010074		2.29793	0.129381	2.54238	0.962047	-0.244452
618	0.00800241	0.0012149	0.00867162	0.00305915	-0.000669216		1.86446	0.0431559	2.52769	0.579035	-0.663232
619_1	0.00821937	0.00231554	0.00785525	0.00313397	0.000364119		2.03462	0.0565164	2.90676	0.552985	-0.872136
620_2	0.00802802	0.00326769	0.00785525	0.00246656	0.000172773		2.70857	0.137142	2.90676	1.18662	-0.198192
621	0.00898934	0.00840598	0.00904184	0.000265433	-5.2495e-05		3.14354	2.09415	2.8603	0.666315	0.28324
622_1	0.00816372	0.00840598	0.00616425	0.000878607	-0.000242259		2.51962	2.09415	1.05715	0.943971	0.425467
623_3	0.00881743	0.00840598	0.00317346	0.0030277	0.000411445		2.28688	2.09415	0.266701	1.10645	0.192726
624_1	0.00909654	0.00359402	0.00867162	0.00296372	0.000424918		2.4488	0.148086	2.52769	1.11091	-0.0788925
626	0.000341923	0.00454817	0.00867162	-0.00626797	-0.0083297		0.00656453	0.161798	2.52769	-1.33818	-2.52113
628	0.00891786	0.00359402	0.00819348	0.00302411	0.000724379		2.74401	0.148086	2.71241	1.31377	0.0316074
629_1	0.00876946	0.00824504	0.00819348	0.000550202	0.000524421		3.00414	1.70834	2.71241	0.793768	0.291736
630_1	0.00908029	0.00794172	0.00785525	0.0011818	0.00113856		2.87426	2.3531	2.90676	0.244327	-0.0325015
631_3	0.00945214	0.00726304	0.00768677	0.00197724	0.00176537		2.32638	1.18081	2.58809	0.441932	-0.261708
632	0.00863363	0.00824504	0.00785525	0.000583489	0.000388595		2.99458	1.70834	2.90676	0.687032	0.0878243
633	0.00843291	0.00617483	0.00785525	0.00141787	0.000577661		3.1543	0.71992	2.90676	1.34096	0.247545
634	0.008564	0.00794172	0.00790383	0.000641221	0.000622274		2.79347	2.3531	2.54238	0.345734	0.251096
635	0.00930791	0.00726304	0.00790383	0.00172447	0.00140408		2.73527	1.18081	2.54238	0.873678	0.192891
636	0.00908361	0.00824504	0.00790383	0.00100918	0.000838571		2.69596	1.70834	2.54238	0.570597	0.153579
637	0.00846363	0.00617483	0.00790383	0.0014243	0.000559802		2.77923	0.71992	2.54238	1.14808	0.236847
638_1	0.00910319	0.00794172	0.0064478	0.00190843	0.00116147		2.27061	2.3531	0.922402	0.632861	-0.0824895
639_2	0.00869787	0.00726304	0.0064478	0.00184245	0.00143483		2.75851	1.18081	0.922402	1.70691	1.5777
640	0.00773002	0.00824504	0.0064478	0.000383596	-0.000515023		2.30228	1.70834	0.922402	0.986909	0.593938
641	0.00875352	0.00841438	0.00867162	0.00021052	8.1899e-05		2.9179	2.46355	2.52769	0.422279	0.390207
642_2	0.00893694	0.00732128	0.00867162	0.000940484	0.000265315		2.70999	1.49242	2.52769	0.699939	0.182301
643_1	0.00887786	0.00833529	0.00815855	0.000630942	0.000542571		2.75427	2.24514	2.70504	0.279176	0.0492239
644_1	0.00936379	0.00767065	0.00815855	0.0014492	0.00120525		2.60046	1.30492	2.70504	0.595477	-0.104582
645_1	0.00727379	0.0080342	0.00815855	-0.00082258	-0.000884756		2.17011	1.49185	2.70504	0.0716632	-0.534932
646_2	0.0089466	0.00804572	0.00768677	0.00108036	0.000900883		2.66615	2.41641	2.58809	0.163902	0.0780632
647	0.00905785	0.00833529	0.00768677	0.00104682	0.000722559		2.61738	2.24514	2.58809	0.200765	0.0292919
648	0.00877556	0.0080342	0.00768677	0.000915081	0.000741368		2.71106	1.49185	2.58809	0.671089	0.122971
649_1	0.00892936	0.00767065	0.00768677	0.00125065	0.00124259		2.75943	1.30492	2.58809	0.812923	0.171343
650_3	0.00886189	0.00804572	0.00844527	0.000616396	0.000416622		2.75514	2.41641	2.12456	0.484657	0.338734
651_3	0.00915907	0.00833529	0.00844527	0.000768797	0.000713809		2.16396	2.24514	2.12456	-0.0208873	-0.0811755
652	0.00899276	0.0080342	0.00844527	0.000753032	0.000547497		2.24604	1.49185	2.12456	0.437831	0.121475
653	0.00906934	0.00767065	0.00844527	0.00101138	0.000624072		2.52577	1.30492	2.12456	0.811026	0.401207
654	0.00907465	0.00804572	0.00649772	0.00180294	0.00102894		2.46857	2.41641	0.568504	0.976116	0.0521634
655_2	0.00913136	0.00833529	0.00649772	0.00171485	0.000796067		2.4162	2.24514	0.568504	1.00938	0.171061
656	0.00888437	0.0080342	0.00649772	0.00161842	0.000850179		2.40401	1.49185	0.568504	1.37384	0.912162
657_3	0.00912207	0.00767065	0.00649772	0.00203788	0.00145142		2.26368	1.30492	0.568504	1.32696	0.958754
658	0.00946394	0.00689801	0.00848801	0.00177094	0.000975934		2.10187	1.72176	2.3836	0.0491949	-0.281727
659	0.00950245	0.00646579	0.00848801	0.00202555	0.00101444		2.40897	1.16978	2.3836	0.63228	0.0253712
660	0.009588	0.00727513	0.00848801	0.00170643	0.00109999		2.23101	1.02087	2.3836	0.528773	-0.152595
662_1	0.00888442	0.00689801	0.00815855	0.00135614	0.000725869		2.73217	1.72176	2.70504	0.51877	0.0271283
665_4	0.00917547	0.00764298	0.00815855	0.00127471	0.00101692		2.86472	2.1054	2.70504	0.459506	0.159682
666_1	0.00867184	0.00689801	0.00768677	0.00137945	0.000985071		2.94021	1.72176	2.58809	0.78529	0.352127
667_1	0.009306	0.00776846	0.00768677	0.00157839	0.00153755		2.69825	1.98486	2.58809	0.41178	0.110169
668_1	0.0088202	0.00764298	0.00768677	0.00115533	0.00113344		2.67612	2.1054	2.58809	0.32938	0.088035
669_2	0.00850045	0.00646579	0.00768677	0.00142417	0.000813684		2.96856	1.16978	2.58809	1.08963	0.380477
670	0.00840861	0.00727513	0.00768677	0.00092766	0.00072184		2.73835	1.02087	2.58809	0.933869	0.15026
671_1	0.00859259	0.00689801	0.00844527	0.00092095	0.000147321		2.66801	1.72176	2.12456	0.74485	0.543448
672	0.00892089	0.00776846	0.00844527	0.000814026	0.000475622		2.64898	1.98486	2.12456	0.59427	0.524421
673	0.00898557	0.00764298	0.00844527	0.000941448	0.000540306		2.5782	2.1054	2.12456	0.463218	0.453634
675_1	0.00919388	0.0071196	0.00844527	0.00141145	0.000748615		2.68216	1.09869	2.12456	1.07054	0.5576
676	0.00878377	0.00689801	0.00649772	0.00208591	0.00188577		2.61132	1.72176	0.568504	1.46619	0.889566
677_1	0.00871825	0.00764298	0.00649772	0.0016479	0.00107527		2.49817	2.1054	0.568504	1.16122	0.392771
678_1	0.00858609	0.00727513	0.00649772	0.00169967	0.00131096		2.37793	1.02087	0.568504	1.58325	1.35707
679_1	0.00885441	0.0071196	0.00649772	0.00204575	0.00173481		2.52651	1.09869	0.568504	1.69291	1.42782

## Sheet: Sheet3
			MPV
1.8087	0.14918	1.45571	0.802443	1.00625	0.352991
