# Supplementary material for: Improved redox homeostasis owing to the up-regulation of one-carbon metabolism and related pathways is crucial for yeast heterosis at high temperature
Source: HighWire-hosted journal article supplement (doi:10.1101/gr.262055.120), 2021-03-15
Supplement: Supplemental_Table_S2.xlsx [file Supplemental_Table_S2.xlsx]

## Sheet: Sheet1
Table S2. Coefficient of determination (R2) values obtained from different models used in the analyses of the correlation between heterosis and genetic distance in S. cerevisiae and optimal mating distances (OMDs) estimated by the quadratic model.
Type of heterosis	R2 (P < 0.05)		OMD (10-3）
	Quadratic model	Linear model
MPH (in growth rate)	0.9312	0.8372	10.56
MPH (in growth efficiency)	0.9459	0.6584	8.27
BPH (in growth rate)	0.4685	0.2618	7.62
BPH (in growth efficiency)	0.5488	0.2678	7.42
