# Supplementary material for: Improved redox homeostasis owing to the up-regulation of one-carbon metabolism and related pathways is crucial for yeast heterosis at high temperature
Source: HighWire-hosted journal article supplement (doi:10.1101/gr.262055.120), 2021-03-15
Supplement: Supplemental_Table_S3.xlsx [file Supplemental_Table_S3.xlsx]

## Sheet: Sheet1
Table S3. Strains employed in RNA-seq analysis, their degrees of heterosis and parental genetic distances (MPV, mid-parent value; BP, better parent value; WP, worst parent value)
Group	F1 hybrid	Parent 1	Parent 2	Parental genetic divergence (10-3)	Maximum growth rate				Growth efficiency
					F1 - MPV	F1 - BP	F1 - WP		F1 - MPV	F1 - BP	F1 - WP
Heterotic F1 hybrids	Hy198	SX6	HN2	10.999	0.00284603	0.00261249	0.00308		1.05215	1.01609	1.08821
	Hy183	SX4	FJ7	10.955	0.00326882	0.00295338	0.00359		0.852408	0.819466	0.88535
	Hy205	SX5	FJ9	10.908	0.00449416	0.00432044	0.00467		0.676461	0.670005	0.68292
	Hy599	HN6	FJSA40.2	10.727	0.00364384	0.00102739	0.00627		1.18112	0.741501	1.62074
	Hy577	HN1	FJSA40.2	10.65	0.00347012	0.00123821	0.0057		1.73757	1.39904	2.0761
	Hy613	FJ8	FJSA40.2	10.598	0.00338415	0.00160595	0.00516		1.46936	1.0572	1.88152
	Hy598	HN5	FJSA40.2	10.591	0.00291813	0.000736373	0.0051		1.15943	0.734921	1.58394
	Hy614	FJ10	FJSA40.2	10.591	0.00278598	0.00119592	0.00437		1.76043	1.3678	2.15307
	Hy581	FJ7	FJSA40.2	10.577	0.00313136	0.00134594	0.00492		1.78534	1.46009	2.11059
	Hy580	FJ5	FJSA40.2	10.555	0.0034105	0.00115708	0.00567		1.50202	1.15422	1.84982
	Hy579	HN7	FJSA40.2	10.552	0.00272943	0.00101641	0.00445		1.23528	0.919606	1.55095
	Hy468	HN1	BJ15	10.526	0.00317266	0.00114769	0.0052		1.68954	1.0592	2.31989
	Hy578	HN2	FJSA40.2	10.482	0.00266316	0.00101651	0.00431		2.00137	1.68573	2.31701
	Hy518	FJ5	BJ16	10.45	0.00358723	0.000895189	0.00628		0.99126	0.0446778	1.93784
	Hy506	FJ10	JL5	10.444	0.00343037	0.000949782	0.00591		1.00625	0.352991	1.65952
	Hy509	FJ10	BJ6	10.393	0.00267521	0.0012861	0.00406		1.79496	1.53154	2.05837
	Hy434	FJ8	BJ23	10.386	0.00486941	0.00454955	0.00519		1.54722	1.54309	1.55134
	Hy482	HN7	BJ15	10.386	0.00306793	0.0012263	0.00491		1.62303	0.984992	2.26108
	Hy440	FJ10	BJ19	10.368	0.00284991	0.00123542	0.00447		1.5495	1.00056	2.09844
	Hy491	FJ7	BJ15	10.35	0.00317046	0.00133076	0.00501		1.59985	0.976648	2.22305
	Hy512	FJ10	BJ15	10.351	0.00283993	0.000922645	0.00476		1.5442	0.944868	2.14353
	Hy504	FJ9	BJ6	10.348	0.00367687	0.00154281	0.00581		1.65907	1.35125	1.9669
	Hy544	SX5	HN10	10.143	0.00359383	0.0024524	0.00474		1.5245	1.39982	1.64918
	Hy541	SX6	HN9	10.13	0.00220263	0.00213293	0.00227		1.96107	1.92151	2.00064
	Hy540	SX4	HN9	10.028	0.00209423	0.00192933	0.00226		1.75336	1.74411	1.76262
	Hy539	SX2	HN9	9.998	0.00279057	0.00189313	0.00369		1.4759	1.37673	1.57507
	Hy542	SX7	HN9	9.81	0.00172602	0.00108437	0.00237		1.62778	1.61939	1.63618
	Hy555	SX4	FJSA40.2	8.996	0.00277838	0.00171997	0.00384		1.81545	1.5533	2.0776
	Hy554	SX2	FJSA40.2	8.896	0.00374575	0.00172656	0.00577		1.88253	1.53845	2.22663
	Hy557	SX7	FJSA40.2	8.757	0.00213638	0.0016232	0.00265		1.69168	1.4354	1.94797
	Hy375	SX6	JL5	8.127	0.00462783	0.00446112	0.00479		2.03933	2.02486	2.05382
	Hy385	SX6	BJ24	8.108	0.00394747	0.00340691	0.00449		1.61253	1.57739	1.64767
	Hy392	SX6	BJ23	8.104	0.00437563	0.0041779	0.00457		1.81834	1.80894	1.82775
	Hy361	SX4	BJ23	7.976	0.00319504	0.00299951	0.00339		1.48674	1.44912	1.52436
	Hy360	SX2	BJ23	7.917	0.00409601	0.00326318	0.00493		1.58304	1.58	1.58608
	Hy363	SX5	BJ16	7.885	0.0039485	0.00160538	0.00629		1.83513	1.1567	2.51356
	Hy365	SX5	BJ15	7.871	0.00397279	0.00147444	0.00647		1.95948	1.31534	2.60361
	Hy393	SX7	BJ14	7.746	0.00240138	0.00169402	0.00311		1.74984	1.52192	1.97777
	Hy377	SX7	JL5	7.737	0.00374153	0.00290727	0.00458		1.77792	1.71156	1.84427
	Hy378	SX7	BJ6	7.723	0.00267086	0.00239992	0.00294		1.75193	1.55613	1.94773
	Hy35	BJ6	HN9	7.48	0.00236248	0.00181624	0.00291		0.685864	0.503877	0.86785
	Hy520	HN10	FJSA40.2	7.37	0.00190667	0.000906738	0.00291		1.72726	1.50287	1.95165
	Hy3	BJ24	FJ2	6.348	0.00260917	0.00236885	0.00285		1.51176	1.26773	1.75579
	Hy639	BJ14	FJSA40.2	6.274	0.00184245	0.00143483	0.00225		1.70691	1.5777	1.83611
	Hy676	BJ16	FJSA40.2	6.236	0.00208591	0.00188576	0.00228		1.46619	0.889566	2.04282
	Hy678	BJ24	FJSA40.2	6.235	0.00169967	0.00131096	0.00209		1.58325	1.35707	1.80943
	Hy657	BJ26	FJSA40.2	6.23	0.00203788	0.00145142	0.00262		1.32696	0.958754	1.69518
	Hy679	BJ15	FJSA40.2	6.158	0.00204575	0.00173481	0.00235		1.69291	1.42782	1.95801
	Hy58	BJ15	BJ19	2.22	0.00222875	0.00219793	0.00226		1.79016	1.71128	1.86904
	Hy301	BJ6	BJ14	2.112	0.00115184	0.000604576	0.0017		1.76212	1.56564	1.95861
Depressed F1 hybrids	Hy626	BJ22	FJ11	6.254	-0.00626798	-0.0083297	-0.00421		-1.33818	-2.52113	-0.15524
	Hy302	BJ14	BJ22	2.45	-0.00187799	-0.00320093	-0.00055		-0.717602	-1.50471	0.0695
	Hy222	BJ8	BJ22	2.385	-0.00277724	-0.00428189	-0.00127		-0.640167	-1.2525	-0.02783
	Hy310	BJ19	BJ22	2.332	-0.00316623	-0.00395213	-0.00238		-0.658388	-1.15905	-0.15773
	Hy311	BJ17	BJ22	2.331	-0.0015231	-0.00304227	-0.00100393		-0.937141	-1.90926	0.03498
	Hy253	BJ21	BJ22	2.265	-0.00230366	-0.00295627	-0.00165		-1.12192	-2.12379	-0.12004
	Hy226	BJ15	BJ22	2.203	-0.00338178	-0.00437973	-0.00238		-0.640825	-1.1286	-0.15305
	Hy281	BJ20	JL5	3.162	-0.000773509	-0.001028	-0.00052		-0.862374	-0.977205	-0.74754
	Hy449	HN6	BJ17	10.464	-0.003675	-0.00689	-0.00046		-1.16134	-2.29465	-0.028035
