# Supplementary material for: Improved redox homeostasis owing to the up-regulation of one-carbon metabolism and related pathways is crucial for yeast heterosis at high temperature
Source: HighWire-hosted journal article supplement (doi:10.1101/gr.262055.120), 2021-03-15
Supplement: Supplemental_Table_S4.xlsx [file Supplemental_Table_S4.xlsx]

## Sheet: Sheet1
Table S4. RNA-seq data obtained
Repeat	Strain	Data size (Gb)	Total reads obtained	Q30 (%)	GC (%)	Unique map	Multiple map	Overall map
Repeat 1	Hy3	3.22	10784945	94.71	41.49	0.8021	0.0319	0.9177
	Hy35	3.18	10645202	90.07	41.29	0.7493	0.0279	0.8861
	Hy58	3.22	10791672	92.98	3.22	0.7317	0.0464	0.8971
	Hy183	3.91	13059759	92.48	3.91	0.8198	0.039	0.9227
	Hy198	2.58	8647546	93.33	2.58	0.7845	0.0349	0.9076
	Hy205	2.32	7780334	93.04	2.32	0.7598	0.047	0.9022
	Hy222	2.26	7550588	92.96	2.26	0.7971	0.0389	0.9156
	Hy226	3.78	12633066	92.56	3.78	0.8447	0.038	0.938
	Hy253	2.63	8793377	92.79	2.63	0.7857	0.031	0.9075
	Hy281	3.34	11151912	92.59	3.34	0.8468	0.0371	0.9375
	Hy301	3.23	10768660	92.73	3.23	0.8454	0.0367	0.9366
	Hy302	2.52	8421603	92.99	2.52	0.7725	0.0405	0.9111
	Hy310	2.88	9610245	93.04	2.88	0.7984	0.0521	0.9218
	Hy311	2.69	9001469	93.93	2.69	0.8053	0.0346	0.9228
	Hy360	2.76	9200494	92.95	2.76	0.7618	0.0392	0.9006
	Hy361	2.9	9713719	93.31	2.9	0.7648	0.0551	0.9098
	Hy363	2.24	7479312	92.76	2.24	0.7429	0.0444	0.8937
	Hy365	2.87	9601399	93.14	2.87	0.7817	0.0317	0.9089
	Hy375	3.26	10877866	92.98	3.26	0.7523	0.065	0.9065
	Hy377	2.82	9412928	92.62	2.82	0.7743	0.0304	0.9039
	Hy378	2.99	9989017	93.2	2.99	0.805	0.0351	0.9139
	Hy385	2.6	8691925	92.79	2.6	0.7592	0.0529	0.9036
	Hy392	2.44	8151626	92.88	2.44	0.7841	0.0331	0.9085
	Hy393	2.48	8284412	93.14	2.48	0.7822	0.0334	0.9033
	Hy434	2.88	9650909	93.19	2.88	0.7866	0.0304	0.9071
	Hy440	2.83	9439363	92.65	2.83	0.7609	0.03	0.9007
	Hy449	2.9	9696645	93.05	2.9	0.7757	0.0348	0.9014
	Hy468	2.77	9282711	92.86	2.77	0.7764	0.0314	0.9038
	Hy482	3.45	11508523	92.71	3.45	0.842	0.0384	0.9354
	Hy491	3.66	12236399	91.68	3.66	0.8429	0.0314	0.9321
	Hy504	2.57	8596798	90.73	2.57	0.7867	0.0262	0.8966
	Hy506	3.36	11239887	92.87	3.36	0.7819	0.0344	0.9066
	Hy509	2.36	7870885	90.57	41.47	0.8103	0.0394	0.9143
	Hy512	2.68	8949298	90.55	41.48	0.8206	0.0339	0.9161
	Hy518	2.36	7880367	90.28	41.59	0.8138	0.0334	0.9119
	Hy520	2.45	8172108	90.6	41.57	0.8315	0.0337	0.9235
	Hy539	2.38	7953816	90.7	41.27	0.8225	0.032	0.9164
	Hy540	2.23	7456359	90.14	41.43	0.8169	0.0345	0.9147
	Hy541	2.51	8379820	89.89	41.53	0.8124	0.0316	0.911
	Hy542	2.71	9046571	90.63	41.35	0.8258	0.0312	0.9176
	Hy544	2.9	9729873	90.22	41.21	0.7595	0.0271	0.8865
	Hy554	2.75	9208377	90.05	41.38	0.7419	0.0265	0.8796
	Hy555	3.23	10802044	89.85	41.17	0.7609	0.0286	0.8865
	Hy557	3.26	10888791	90.16	41.2	0.7571	0.0329	0.8892
	Hy577	2.84	9507409	90	41.2	0.734	0.0267	0.8751
	Hy578	3.24	10834903	89.87	41.34	0.7318	0.0268	0.8726
	Hy579	3.04	10208445	90.62	41.31	0.7353	0.0278	0.8768
	Hy580	3.18	10639068	89.82	41.34	0.7287	0.0271	0.8725
	Hy581	2.95	9875040	90.32	41.35	0.7483	0.0289	0.8788
	Hy598	3.28	11002894	89.79	41.22	0.731	0.0269	0.8733
	Hy599	2.99	10033542	90.26	41.28	0.7592	0.0306	0.8825
	Hy613	2.76	9239553	89.94	41.31	0.7314	0.0249	0.8721
	Hy614	3.1	10367738	89.98	41.23	0.7337	0.0262	0.8745
	Hy626	2.46	8217077	89.68	41.6	0.7267	0.0401	0.8772
	Hy639	2.91	9746502	90.19	41.33	0.7639	0.0291	0.8916
	Hy657	2.46	8240686	90.3	41.54	0.7845	0.0347	0.9018
	Hy676	2.84	9509277	89.57	41.43	0.733	0.0291	0.8817
	Hy678	2.52	8462725	89.89	41.32	0.7306	0.0295	0.8786
	Hy679	2.23	7452831	90.67	41.53	0.8304	0.0324	0.9221
	FJ2	3.14	10478636	89.09	41.71	0.7293	0.0329	0.8767
	FJ5	2.78	9287825	89.72	41.07	0.7175	0.0251	0.8597
	FJ7	2.83	9457418	90.07	41.17	0.7195	0.0241	0.8607
	FJ8	2.66	8877180	91.96	41.42	0.7524	0.0265	0.8828
	FJ9	2.65	8856875	91.71	40.97	0.7767	0.0228	0.8929
	FJ10	2.51	8376726	91.55	41.01	0.7618	0.0265	0.8877
	JL5	2.73	9172237	89.98	41.26	0.7288	0.0282	0.8754
	BJ6	2.82	9421523	91.1	41.32	0.7722	0.0322	0.9024
	BJ8	2.83	9470925	91.79	41.41	0.7846	0.0327	0.9073
	BJ14	2.65	8897642	91.58	41.11	0.7668	0.0279	0.8981
	BJ15	2.77	9272732	91.13	41.41	0.7549	0.0264	0.8812
	BJ16	2.25	7554850	89.74	41.31	0.7383	0.0285	0.8773
	BJ17	2.36	7931047	91.43	41.12	0.765	0.0292	0.9014
	BJ19	2.62	8751419	91.25	41.13	0.7656	0.0277	0.9013
	BJ20	2.42	8128736	91.52	41.37	0.7583	0.0289	0.8927
	BJ21	3.07	10295931	91.47	41.16	0.763	0.0344	0.8999
	BJ22	2.83	9468113	91.34	41.27	0.74	0.0286	0.892
	BJ23	2.81	9395677	91.76	41.11	0.7858	0.0315	0.9107
	BJ24	2.61	8761236	91.61	41.1	0.7687	0.0259	0.9004
	BJ26	2.75	9211584	91.52	41.18	0.7872	0.0281	0.9076
	SX2	2.85	9504728	92.42	2.85	0.7772	0.0277	0.8993
	SX3	2.96	9881514	92.88	2.96	0.7811	0.0327	0.9032
	SX4	2.97	9963153	93.03	2.97	0.7754	0.0334	0.9005
	SX5	2.81	9431268	91.27	2.81	0.7697	0.0296	0.8949
	SX6	2.64	8819979	92.63	2.64	0.7658	0.0313	0.8991
	SX7	2.62	8763946	92.74	2.62	0.7729	0.0286	0.8988
	FJ11	3.19	10698114	93.33	3.19	0.7835	0.0358	0.915
	FJSA40.2	3.08	10307439	93.15	3.08	0.8009	0.0338	0.9179
	HN1	2.89	9640037	92.82	2.89	0.7585	0.0295	0.8927
	HN2	3.02	10112042	93.3	3.02	0.7535	0.0639	0.9031
	HN5	2.83	9466698	92.81	2.83	0.7789	0.0311	0.8988
	HN6	2.57	8602113	93.28	2.57	0.7596	0.0335	0.8877
	HN7	2.56	8539573	90.69	41.25	0.8148	0.0305	0.9083
	HN9	2.89	9668580	92.35	2.89	0.773	0.0309	0.8991
	HN10	2.72	9120916	93.27	2.72	0.7858	0.0276	0.9075
Repeat 2	Hy3	2.81	9420834	94.44	41.47	0.789	0.034	0.9149
	Hy35	2.57	8644036	94.59	41.38	0.8004	0.0293	0.9165
	Hy58	2.53	8498231	94.81	41.55	0.8127	0.0304	0.9211
	Hy183	2.72	9103552	91.64	40.89	0.7698	0.0257	0.8935
	Hy198	2.44	8185791	91.7	41.02	0.7552	0.0274	0.8878
	Hy205	2.68	9007678	90.78	41.14	0.7018	0.0259	0.8744
	Hy222	2.45	8215577	91.32	41.11	0.7482	0.0312	0.8982
	Hy226	2.64	8844604	91.57	41.01	0.7585	0.0292	0.9015
	Hy253	2.68	8999655	91.5	41.14	0.7419	0.0271	0.8903
	Hy281	2.44	8152119	91.08	41.27	0.7565	0.0285	0.8974
	Hy301	2.66	8890790	91.36	41.32	0.7653	0.0281	0.9004
	Hy302	2.59	8659815	91.32	41.16	0.7419	0.025	0.8935
	Hy310	2.84	9492297	91.45	41.43	0.7544	0.047	0.9021
	Hy311	2.61	8772406	91.89	41.12	0.7511	0.0317	0.8966
	Hy360	3.05	10202777	91.28	41.42	0.7537	0.0301	0.8979
	Hy361	2.69	8986738	91.58	41.34	0.7697	0.0298	0.9033
	Hy363	2.63	8801736	91.01	41.34	0.7361	0.0276	0.8888
	Hy365	2.14	7150471	91.33	41.23	0.7377	0.0305	0.8884
	Hy375	2.47	8258390	91.45	41.09	0.749	0.0297	0.8921
	Hy377	2.31	7740532	91.3	41.1	0.7384	0.0267	0.8876
	Hy378	2.43	8120400	92.39	41.54	0.8445	0.0351	0.9349
	Hy385	3.2	10734192	91.84	41.25	0.7536	0.0277	0.8932
	Hy392	2.46	8249933	91.26	41.13	0.7597	0.0293	0.8988
	Hy393	2.61	8731671	91.88	41.31	0.7654	0.028	0.8972
	Hy434	3	10032800	92.44	41.49	0.8395	0.035	0.9307
	Hy440	2.49	8341222	91.48	41.11	0.7612	0.029	0.8958
	Hy449	2.41	8086894	91.15	41.13	0.7459	0.028	0.8872
	Hy468	2.64	8861098	91.25	41.17	0.737	0.0272	0.8891
	Hy482	2.45	8225082	91.9	41.32	0.768	0.0276	0.8987
	Hy491	2.72	9115630	91.09	41.14	0.73	0.0266	0.8826
	Hy504	2.43	8153516	90.9	41.18	0.7287	0.0267	0.8847
	Hy506	2.93	9797119	91.3	41.29	0.7318	0.0291	0.8858
	Hy509	2.64	8845393	94.62	41.87	0.866	0.0346	0.9439
	Hy512	2.94	9856335	93.82	42.06	0.8601	0.0377	0.9437
	Hy518	2.6	8732533	94.55	41.37	0.7836	0.0299	0.9048
	Hy520	2.82	9452820	94.13	41.93	0.8654	0.0385	0.9468
	Hy539	3.37	11301879	94.32	42.05	0.873	0.0416	0.9512
	Hy540	2.51	8439335	94.28	42.05	0.8678	0.0361	0.9471
	Hy541	2.65	8895902	94.29	41.95	0.8683	0.0368	0.9475
	Hy542	3.12	10472781	94.4	42.26	0.8098	0.1023	0.9519
	Hy544	2.85	9552284	94.26	41.84	0.8728	0.0332	0.9479
	Hy554	2.5	8378252	94.19	41.7	0.7772	0.0311	0.9056
	Hy555	2.78	9318630	94.66	41.44	0.7685	0.0292	0.9022
	Hy557	2.58	8624504	90.41	41.5	0.8367	0.0325	0.9268
	Hy577	2.62	8795637	94.93	41.44	0.7666	0.0304	0.9022
	Hy578	2.81	9428339	94.75	41.04	0.7851	0.0276	0.9084
	Hy579	2.82	9434493	94.41	41.19	0.767	0.0268	0.9
	Hy580	2.78	9332545	94.79	41.36	0.7854	0.0293	0.9057
	Hy581	3.2	10723765	94.42	41.19	0.7841	0.0275	0.9073
	Hy598	2.97	9919573	94.64	41.01	0.7894	0.0257	0.9062
	Hy599	2.83	9463915	94.68	41.17	0.7716	0.0286	0.9029
	Hy613	3.06	10242266	92.31	41.56	0.8492	0.043	0.9391
	Hy614	2.59	8680541	94.68	41.32	0.7918	0.0272	0.9083
	Hy626	2.96	9879145	94.8	41.37	0.8061	0.0304	0.917
	Hy639	3.04	10166551	93.74	41.29	0.7873	0.0293	0.9107
	Hy657	2.61	8717757	90.23	41.72	0.8404	0.0365	0.933
	Hy676	2.67	8925988	94.54	41.42	0.7698	0.0307	0.9011
	Hy678	2.71	9097685	94.54	41.41	0.7974	0.0339	0.9162
	Hy679	2.93	9817765	94.75	41.53	0.8121	0.0324	0.9205
	FJ2	2.96	9911491	94.53	41.68	0.7989	0.0387	0.9207
	FJ5	2.37	7969657	95.04	41.21	0.7815	0.0293	0.898
	FJ7	2.73	9148166	94.51	41.15	0.7525	0.0254	0.8884
	FJ8	2.95	9847763	94.51	41.21	0.7814	0.0372	0.9051
	FJ9	2.81	9400842	94.64	40.87	0.7784	0.0227	0.8972
	FJ10	2.55	8518653	93.83	41.2	0.7612	0.0293	0.8965
	JL5	2.56	8589980	94.28	41.47	0.7967	0.0337	0.9161
	BJ6	3.29	10994833	94.36	41.63	0.7829	0.0327	0.9053
	BJ8	2.73	9122002	92	41.6	0.782	0.0453	0.9162
	BJ14	2.57	8597393	90.25	41.73	0.837	0.0359	0.928
	BJ15	2.79	9397379	94.5	41.42	0.772	0.0345	0.9104
	BJ16	2.45	8211589	90.22	42.04	0.8389	0.0396	0.9327
	BJ17	2.72	9121650	92.37	41.63	0.7723	0.033	0.9049
	BJ19	2.99	10003560	92.3	41.77	0.8637	0.0363	0.9448
	BJ20	2.35	7875667	93.22	41.44	0.7854	0.0318	0.9078
	BJ21	2.55	8535902	94.71	41.4	0.8097	0.0365	0.9252
	BJ22	2.28	7606081	93.72	41.85	0.7644	0.0353	0.9
	BJ23	2.52	8432678	93.34	41.35	0.7919	0.0296	0.9138
	BJ24	2.72	9105380	94.59	41.31	0.7857	0.0293	0.9103
	BJ26	2.5	8377396	94.03	41.72	0.7508	0.0481	0.9039
	SX2	3.01	10090184	94.77	41.21	0.7749	0.0267	0.8989
	SX3	2.65	8889547	94.65	41.07	0.7684	0.0261	0.8973
	SX4	2.78	9305959	94.84	41.17	0.7693	0.0349	0.9021
	SX5	2.55	8528554	94.53	41.26	0.775	0.0278	0.9013
	SX6	2.96	9904460	89.9	41.27	0.8166	0.0383	0.9168
	SX7	2.64	8839870	94.23	41.13	0.7717	0.027	0.9001
	FJ11	2.71	9056278	94.38	41.46	0.8023	0.0305	0.9194
	FJSA40.2	2.84	9530375	94.34	41.32	0.7852	0.029	0.9102
	HN1	3.21	10752571	93.88	41.37	0.8604	0.0289	0.9334
	HN2	2.62	8773822	94.22	41.27	0.766	0.0248	0.8907
	HN5	2.98	9981480	90.03	41.27	0.8224	0.0251	0.9103
	HN6	2.58	8646833	94.19	41	0.774	0.0228	0.8946
	HN7	2.51	8413312	94.67	41.26	0.7778	0.0276	0.8989
	HN9	3.23	10813529	93.88	41.29	0.7535	0.0349	0.8907
	HN10	3.07	10315790	94.35	41.61	0.8647	0.0345	0.942
