# Supplementary material for: Improved redox homeostasis owing to the up-regulation of one-carbon metabolism and related pathways is crucial for yeast heterosis at high temperature
Source: HighWire-hosted journal article supplement (doi:10.1101/gr.262055.120), 2021-03-15
Supplement: Supplemental_Table_S5.xlsx [file Supplemental_Table_S5.xlsx]

## Sheet: Sheet1
Table S5. Lists of strains, genes and primers used in quantitative real-time PCR analysis and quality of the data obtained
Strain	Gene	Mean Cq	–△Cq (mean)	2–△Cq (mean)	Primer
Hy58	ADE13	17.395	1.965	3.90413	ADE13	F:CGCAAACACGTCGAAATCACT
	ADE3	19.5467	-0.186667	0.878633		R:AGCCGGACAAGTTTCACCAA
	ADE8	19.52	-0.16	0.895025	ADE3	F:TCGCGTGGCTTTGAAATTGG
	ARG3	21.4167	-2.05667	0.240371		R:CCAGAGGAACGGCACTTGAT
	FRE1	22.8067	-3.44667	0.091717	ADE8	F: TGTCAGGACGAGAACAAGCC
	GCV1	20.5733	-1.21333	0.431271		R: ACCCTTTGCTCGTACTGCTC
	GPA1	21.385	-2.025	0.245705	ARG3	F: GTTGCTGAGAGAAACGGTGC
	LYS14	19.36	0	1		R: GCTTGGCCTGTTTCGCAAAT
	MTD1	17.5667	1.79333	3.46615	FRE1	F: GGCAAGGGTCTCGTCGTATT
	PRM5	21.92	-2.56	0.169576		R: GCAATGGCCATCAAGTCTGC
	PRX1	19.49	-0.13	0.913831	GCV1	F: GAGCAACTCTTGGCCAATCC
	PYC1	21.395	-2.035	0.244008		R: TCACCCAGTTTAACGCAGCT
	QDR2	22.215	-2.855	0.138216	GPA1	F: TGATTACCAGGGACGTGTCG
	RAD54	20.35	-0.99	0.503478		R: AGTTTGGGTATCGGTAGCGC
	RPL8B	13.1	6.26	76.6386	LYS14	F:GAAGACACCACGGACCCTAA
	SHM2	16.23	3.13	8.75435		R:GTCCAAATCGGGCAAATCTA
	UBP11	20.59	-1.23	0.426317	MTD1	F: ATTAGCCAATGACGGTGCCA
	ZWF1	19.435	-0.075	0.949342		R: TCAGAGTACTCCCCAAGGTCT
Hy554	ADE13	18.265	1.365	2.57576	PRM5	F: TCACCAAGTCGAAAGCTGCT
	ADE3	20.55	-0.92	0.528509		R: TCTTTCCCCTCCAGCATGTG
	ADE8	20.175	-0.545	0.685391	PRX1	F: TCACCCAGCAGATTTCACCC
	ARG3	22.23	-2.6	0.164938		R: CGTGGGACTCAACATCTTCCA
	FRE1	21.065	-1.435	0.369847	PYC1	F: TGGAGAACAATGGGCCGAAA
	GCV1	20.515	-0.885	0.541488		R: TTAGCCAGGCGTCTCACATC
	GPA1	21.4767	-1.84667	0.278034	QDR2	F: CACATTCATGGGCGGGTTTG
	LYS14	19.63	0	1		R: AATACCGGCGGCTTGTAGAC
	MTD1	18.6	1.03	2.04202	RAD54	F: AGTGCTGTACGGTTGGATGG
	PRM5	21.05	-1.42	0.373712		R: TTGATACCACACCCACCTGC
	PRX1	18.16	1.47	2.77022	RPL8B	F: GCCAAGCTGTCCAACCAAAG
	PYC1	20.43	-0.8	0.574349		R: CAGCGGTGTTTCTGTCCAAAG
	QDR2	21.195	-1.565	0.337978	SHM2	F: CGTTACCACCACCACTCACA
	RAD54	19.825	-0.195	0.873573		R: CACCTTGGTGACCTGGGAAA
	RPL8B	12.84	6.79	110.661	UBP11	F: ACTGGCCTGCAAAATCCATG
	SHM2	18.24	1.39	2.62079		R: AATCGAGCGGGAAAGTTGGA
	UBP11	20.6767	-1.04667	0.484085	ZWF1	F: TCTGTCTTTGGTGCGTCAGG
	ZWF1	19.81	-0.18	0.882703		R: TAGGACACGGGACTTCAGGT
Hy676	ADE13	16.91	2.22333	4.66971
	ADE3	18.8667	0.266667	1.20303
	ADE8	19.1933	-0.06	0.959264
	ARG3	20.8467	-1.71333	0.304955
	FRE1	20.43	-1.29667	0.407066
	GCV1	20.24	-1.10667	0.464366
	GPA1	20.59	-1.45667	0.364334
	LYS14	19.1333	0	1
	MTD1	17.74	1.39333	2.62685
	PRM5	20.51	-1.37667	0.385108
	PRX1	17.72	1.41333	2.66352
	PYC1	19.6033	-0.47	0.721965
	QDR2	21.3333	-2.2	0.217638
	RAD54	20.37	-1.23667	0.424352
	RPL8B	12.74	6.39333	84.0592
	SHM2	16.47	2.66333	6.33495
	UBP11	20.3033	-1.17	0.444421
	ZWF1	19.17	-0.0366667	0.974905
Hy518	ADE13	16.465	3.585	12.0003
	ADE3	18.5167	1.53333	2.89454
	ADE8	18.24	1.81	3.50642
	ARG3	21.2	-1.15	0.450625
	FRE1	20.03	0.02	1.01396
	GCV1	20.2467	-0.196667	0.872564
	GPA1	21.3433	-1.29333	0.408007
	LYS14	20.05	0	1
	MTD1	17.5667	2.48333	5.59188
	PRM5	22.52	-2.47	0.180491
	PRX1	18.9133	1.13667	2.19872
	PYC1	21.31	-1.26	0.417544
	QDR2	22.2	-2.15	0.225313
	RAD54	21.3	-1.25	0.420448
	RPL8B	13.6467	6.40333	84.6438
	SHM2	16.88	3.39	10.4831
	UBP11	21.605	-1.555	0.340329
	ZWF1	19.8333	0.216667	1.16205
Hy577	ADE13	17.33	3.62333	12.3234
	ADE3	19.5567	1.39667	2.63293
	ADE8	19.105	1.84833	3.60084
	ARG3	21.72	-0.766667	0.587774
	FRE1	21.4767	-0.523333	0.695762
	GCV1	20.74	0.213333	1.15936
	GPA1	22.54	-1.58667	0.33294
	LYS14	20.9533	0	1
	MTD1	18.4267	2.52667	5.76239
	PRM5	24.06	-3.10667	0.116091
	PRX1	19.49	1.46333	2.75745
	PYC1	21.1333	-0.18	0.882703
	QDR2	22.2033	-1.25	0.420448
	RAD54	21.4433	-0.49	0.712025
	RPL8B	13.6167	7.33667	161.643
	SHM2	18.27	2.68333	6.42338
	UBP11	23.0267	-2.07333	0.23761
	ZWF1	21.4667	-0.513333	0.700602
Hy614	ADE13	16.185	8.575	381.357
	ADE3	18.96	5.8	55.7152
	ADE8	18.5	6.26	76.6386
	ARG3	20.22	4.54	23.2636
	FRE1	21.03	3.73	13.2691
	GCV1	20.485	4.275	19.3599
	GPA1	20.6867	4.07333	16.8343
	LYS14	24.76	0	1
	MTD1	19.36	5.4	42.2243
	PRM5	20.535	4.225	18.7004
	PRX1	18.09	6.67	101.829
	PYC1	21.03	3.73	13.2691
	QDR2	21.315	3.445	10.8905
	RAD54	19.22	5.54	46.5271
	RPL8B	10.925	13.835	14613.4
	SHM2	19.695	5.065	33.4747
	UBP11	20.79	3.97	15.6707
	ZWF1	18.99	5.77	54.5686
Hy639	ADE13	15.78	2.445	5.44526
	ADE3	17.93	0.295	1.22688
	ADE8	17.8	0.425	1.34257
	ARG3	20.3767	-2.15167	0.225052
	FRE1	19.17	-0.945	0.51943
	GCV1	18.51	-0.285	0.820742
	GPA1	20.165	-1.94	0.260616
	LYS14	18.225	0	1
	MTD1	16.305	1.92	3.78423
	PRM5	20.94	-2.715	0.152301
	PRX1	16.95	1.275	2.41999
	PYC1	18.345	-0.12	0.920188
	QDR2	21.475	-3.25	0.105112
	RAD54	18.995	-0.77	0.586417
	RPL8B	11.47	6.755	108.008
	SHM2	16.285	1.94	3.83706
	UBP11	20.41	-2.185	0.219912
	ZWF1	18.9	-0.675	0.626332
Hy657	ADE13	15.32	3.965	15.6165
	ADE3	17.61	1.675	3.19319
	ADE8	18.1933	1.09167	2.1312
	ARG3	21.7	-2.415	0.187505
	FRE1	21.44	-2.155	0.224533
	GCV1	19.5267	-0.241667	0.845768
	GPA1	21.24	-1.955	0.257921
	LYS14	19.285	0	1
	MTD1	17.5167	1.76833	3.4066
	PRM5	21.665	-2.38	0.192109
	PRX1	19.545	-0.26	0.835088
	PYC1	21.3933	-2.10833	0.231915
	QDR2	21.245	-1.96	0.257028
	RAD54	20.04	-0.755	0.592546
	RPL8B	12.495	6.79	110.661
	SHM2	15.2033	4.08167	16.9318
	UBP11	21.06	-1.775	0.292194
	ZWF1	20.11	-0.825	0.564482
Hy678	ADE13	15.5	3.79333	13.8646
	ADE3	17.8367	1.45667	2.74473
	ADE8	18.125	1.16833	2.24752
	ARG3	21.57	-2.27667	0.206374
	FRE1	21.58	-2.28667	0.204948
	GCV1	19.18	0.113333	1.08172
	GPA1	21.4467	-2.15333	0.224793
	LYS14	19.2933	0	1
	MTD1	17.18	2.11333	4.3269
	PRM5	21.69	-2.39667	0.189903
	PRX1	19.3567	-0.0633333	0.95705
	PYC1	20.72	-1.42667	0.371989
	QDR2	22.195	-2.90167	0.133817
	RAD54	20.3133	-1.02	0.493116
	RPL8B	12.15	7.14333	141.37
	SHM2	16.43	2.86333	7.27695
	UBP11	21.5267	-2.23333	0.212667
	ZWF1	20.72	-1.42667	0.371989
Hy679	ADE13	16.43	2.67	6.36429
	ADE3	18.7833	0.316667	1.24545
	ADE8	18.8833	0.216667	1.16205
	ARG3	21.26	-2.16	0.223756
	FRE1	20.9	-1.8	0.287175
	GCV1	19.5633	-0.463333	0.725309
	GPA1	21.02	-1.92	0.264255
	LYS14	19.1	0	1
	MTD1	17.3467	1.75333	3.37137
	PRM5	21.2467	-2.14667	0.225834
	PRX1	18.38	0.72	1.64718
	PYC1	19.9	-0.8	0.574349
	QDR2	21.9733	-2.87333	0.136471
	RAD54	19.8833	-0.783333	0.581023
	RPL8B	12.3567	6.74333	107.139
	SHM2	16.66	2.44	5.42642
	UBP11	20.7933	-1.69333	0.309212
	ZWF1	21.065	-1.965	0.256139
BJ16	ADE13	17.6233	6.52167	91.8792
	ADE3	21.0233	3.12167	8.70393
	ADE8	20.0433	4.10167	17.1682
	ARG3	22.7833	1.36167	2.56982
	FRE1	23.72	0.425	1.34257
	GCV1	19.9733	4.17167	18.0217
	GPA1	22.0533	2.09167	4.2624
	LYS14	24.145	0	1
	MTD1	17.9	6.245	75.8459
	PRM5	23.11	1.035	2.04911
	PRX1	21.2833	2.86167	7.26855
	PYC1	24.3233	-0.178333	0.883723
	QDR2	23.48	0.665	1.58557
	RAD54	21.84	2.305	4.94167
	RPL8B	14.25	9.895	952.12
	SHM2	17.495	6.65	100.427
	UBP11	24.2533	-0.108333	0.927659
	ZWF1	23.04	1.105	2.15099
BJ21	ADE13	15.26	3.245	9.48074
	ADE3	17.44	1.065	2.09217
	ADE8	17.15	1.355	2.55797
	ARG3	20.21	-1.705	0.306721
	FRE1	20.0967	-1.59167	0.331788
	GCV1	18.72	-0.215	0.861546
	GPA1	19.425	-0.92	0.528509
	LYS14	18.505	0	1
	MTD1	14.49	4.015	16.1672
	PRM5	20.44	-1.935	0.261521
	PRX1	17.015	1.49	2.80889
	PYC1	19.62	-1.115	0.461691
	QDR2	20.665	-2.16	0.223756
	RAD54	18.73	-0.225	0.855595
	RPL8B	11.32	7.185	145.513
	SHM2	14.645	3.86	14.5203
	UBP11	20.045	-1.54	0.343885
	ZWF1	19.835	-1.33	0.397768
BJ26	ADE13	16.8067	2.19	4.56305
	ADE3	18.65	0.346667	1.27162
	ADE8	19.01	-0.0133333	0.990801
	ARG3	21.3333	-2.33667	0.197967
	FRE1	20.5233	-1.52667	0.347078
	GCV1	19.91	-0.913333	0.530957
	GPA1	21.06	-2.06333	0.239263
	LYS14	18.9967	0	1
	MTD1	16.6233	2.37333	5.18137
	PRM5	20.0533	-1.05667	0.480742
	PRX1	18.05	0.946667	1.92741
	PYC1	20.3767	-1.38	0.384219
	QDR2	22.1067	-3.11	0.115824
	RAD54	20.48	-1.48333	0.357661
	RPL8B	12.9433	6.05333	66.4102
	SHM2	16.3733	2.62333	6.16172
	UBP11	20.89	-1.89333	0.269184
	ZWF1	18.8433	0.153333	1.11214
BJ6	ADE13	15.61	3.39333	10.5074
	ADE3	17.1467	1.85667	3.6217
	ADE8	18.3333	0.67	1.59107
	ARG3	17.6767	1.32667	2.50822
	FRE1	19.9133	-0.91	0.532185
	GCV1	19.2167	-0.213333	0.862542
	GPA1	19.8833	-0.88	0.543367
	LYS14	19.0033	0	1
	MTD1	15.69	3.31333	9.9406
	PRM5	19.61	-0.606667	0.656712
	PRX1	17.4967	1.50667	2.84153
	PYC1	19.0567	-0.0533333	0.963707
	QDR2	20.74	-1.73667	0.300062
	RAD54	20.19	-1.18667	0.439317
	RPL8B	13	6.00333	64.148
	SHM2	16.8	2.20333	4.60542
	UBP11	20.65	-1.64667	0.319377
	ZWF1	18.5633	0.44	1.3566
FJ7	ADE13	17.62	2.81667	7.04533
	ADE3	20.1933	0.243333	1.18372
	ADE8	18.4367	2	4
	ARG3	18.99	1.44667	2.72578
	FRE1	18.3867	2.05	4.14106
	GCV1	20.1967	0.24	1.18099
	GPA1	21.1367	-0.7	0.615572
	LYS14	20.4367	0	1
	MTD1	18.4333	2.00333	4.00925
	PRM5	19.9933	0.443333	1.35974
	PRX1	17.4	3.03667	8.20593
	PYC1	18.78	1.65667	3.15287
	QDR2	19.8267	0.61	1.52626
	RAD54	19.8267	0.61	1.52626
	RPL8B	12.9833	7.45333	175.258
	SHM2	19.2433	1.19333	2.2868
	UBP11	20.2567	0.18	1.13288
	ZWF1	18.99	1.44667	2.72578
FJ8	ADE13	17.5433	3.12667	8.73415
	ADE3	20.2467	0.423333	1.34102
	ADE8	18.4	2.27	4.82323
	ARG3	19.72	0.95	1.93187
	FRE1	19.8733	0.796667	1.73708
	GCV1	20.54	0.13	1.09429
	GPA1	21.53	-0.86	0.550953
	LYS14	20.67	0	1
	MTD1	18.685	1.985	3.95863
	PRM5	19.74	0.93	1.90528
	PRX1	18.88	1.79	3.45815
	PYC1	18.9133	1.75667	3.37916
	QDR2	21.8933	-1.22333	0.428292
	RAD54	20.3367	0.333333	1.25992
	RPL8B	12.8633	7.80667	223.893
	SHM2	19.5067	1.16333	2.23974
	UBP11	20.76	-0.09	0.939523
	ZWF1	20.9167	-0.246667	0.842842
HN7	ADE13	18.52	3.92	15.1369
	ADE3	21.4567	0.983333	1.97703
	ADE8	20.3033	2.13667	4.39745
	ARG3	21.1733	1.26667	2.40605
	FRE1	20.15	2.29	4.89056
	GCV1	22.0633	0.376667	1.29834
	GPA1	22.0767	0.363333	1.28639
	LYS14	22.44	0	1
	MTD1	19.44	3	8
	PRM5	22.31	0.13	1.09429
	PRX1	19.3833	3.05667	8.32048
	PYC1	19.1233	3.31667	9.9636
	QDR2	21.83	0.61	1.52626
	RAD54	20.615	1.825	3.54307
	RPL8B	13.45	8.99	508.463
	SHM2	19.89	2.55	5.85634
	UBP11	23.02	-0.58	0.668964
	ZWF1	21.03	1.41	2.65737
SX3	ADE13	18.3933	2.16167	4.47431
	ADE3	20.9133	-0.358333	0.780065
	ADE8	20.5467	0.00833333	1.00579
	ARG3	20.4033	0.151667	1.11085
	FRE1	19.985	0.57	1.48452
	GCV1	21.4267	-0.871667	0.546515
	GPA1	21.1467	-0.591667	0.663576
	LYS14	20.555	0	1
	MTD1	20.4933	0.0616667	1.04367
	PRM5	20.49	0.065	1.04608
	PRX1	18.57	1.985	3.95863
	PYC1	21.78	-1.225	0.427798
	QDR2	20.86	-0.305	0.809442
	RAD54	20.305	0.25	1.18921
	RPL8B	13.315	7.24	151.167
	SHM2	19.26	1.295	2.45377
	UBP11	20.755	-0.2	0.870551
	ZWF1	20.255	0.3	1.23114
