# Supplementary material for: Improved redox homeostasis owing to the up-regulation of one-carbon metabolism and related pathways is crucial for yeast heterosis at high temperature
Source: HighWire-hosted journal article supplement (doi:10.1101/gr.262055.120), 2021-03-15
Supplement: Supplemental_Table_S7.xlsx [file Supplemental_Table_S7.xlsx]

## Sheet: Sheet1
Table S7. Co-expressed non-additive genes (NAGs) and the NAGs with expression levels significantly correlated with the maximum growth rates or growth efficiencies of the F1 hybrids at 40°C
Co-expressed NAGs sorted by WGCNA analysis (r >= 0.5)				Trait correlated NAGs (r >= 0.5 or < = -0.5, p< 0.05)
lightgreen module	turquoise module	pink module	green module
YLR326W	YMR230W	YDR321W	YMR016C	YLR040C
YGL174W	YOR030W	YER035W	YMR020W	YNR060W
YKL164C	YBL004W	YJL144W	YBR001C	YML131W
YDR489W	YBL001C	YBR269C	YMR073C	YHL030W
YDL040C	YER034W	YGL237C	YIR034C	YHR005C
YBR160W	YER029C	YCL038C	YLR376C	YIR034C
YLR079W	YER028C	YHR104W	YLR377C	YGL062W
YGR153W	YGL106W	YKL171W	YJL123C	YCL026C-B
YLR332W	YGL105W	YOR223W	YOR051C	YNL037C
YDR163W	YML064C	YJR008W	YOR058C	YIL024C
YIL068C	YMR072W	YNL274C	YBR021W	YJL212C
YHR143W	YJR004C	YOR362C	YDR003W	YIL146C
YOR114W	YJL149W	YOR370C	YDR239C	YER004W
YOR279C	YJL147C	YDR258C	YOR245C	YPL265W
YHR117W	YJL145W	YCR034W	YGL247W	YOR040W
YDL101C	YHL040C	YNL037C	YLR104W	YJL133C-A
YNL327W	YGL178W	YGR101W	YCL044C	YIL006W
YOR303W	YOR184W	YPR011C	YJR061W	YJL116C
YLR275W	YOR182C	YDL010W	YKL175W	YOR388C
YDL117W	YLR368W	YCR048W	YFR010W	YEL071W
YNL066W	YLR369W	YCR053W	YDR273W	YNL012W
YDL179W	YLR371W	YCR052W	YDL142C	YOL119C
YLR443W	YGR184C	YER094C	YGL062W	YIR025W
YPL022W	YPL110C	YOR157C	YMR180C	YDL182W
YPL023C	YPL119C	YDR531W	YJR010W	YCR005C
YOL054W	YPL113C	YDR533C	YLR119W	YNL155W
YGR035W-A	YHR082C	YHR020W	YCL025C	YML058W
YJR111C	YHR079C	YHR019C	YCL026C-B	YGL008C
YLR298C	YDR450W	YOR324C	YJL093C	YBR001C
YNL078W	YDR454C	YPR037C	YDR261C	YER028C
YGR041W	YJL124C	YNL162W-A	YHR199C-A	YPL119C
YKL185W	YJL127C	YPL183C	YFR037C	YBR269C
YDR504C	YJL130C	YJL163C	YFR042W	YKL171W
YDR183W	YOR057W	YKR011C	YIL024C	YDR273W
YGL028C	YIL013C	YOR117W	YER095W	YNL274C
YMR148W	YIL008W	YNL016W	snR44	YDR492W
YNL046W	YBR016W	YKL195W	YJR074W	YPL272C
YNL045W	YBR013C	YBR105C	YJR073C	YPR185W
YNL047C	YNL094W	YGR046W	YMR136W	YER119C
YJL078C	YNL096C	YJL193W	YGR155W	YGR142W
YGL087C	YNL091W	YPL260W	YDR540C	YPL258C
YOR148C	YBR265W	YOR094W	YPR036W-A	YJL163C
YOR066W	YBR270C	YOR095C	YPR036W	YEL049W
YJL174W	YDR006C	YIL107C	YPR040W	YKR011C
YDL069C	YDR002W	YDL097C	YIL095W	YPL240C
YLR286C	YDR242W	YBL058W	YDR300C	YBR105C
YER124C	YNL245C	YOR304C-A	YBR197C	YLR070C
YGL127C	YNL250W	YOR305W	YBR194W	YNR068C
YHR049W	YNL254C	YPR103W	YMR115W	YPR115W
YGR282C	YNL251C	YLR188W	snR87	YBR140C
YEL013W	YOR249C	YLR270W	YCR079W	YHL036W
YBR158W	YML035C	YBR085W	YCR082W	YKR098C
YLR246W	YGL090W	YBR079C	YMR118C	YGR030C
YMR088C	YGL245W	YBR084W	YOR136W	YPL017C
YOR264W	YLR099W-A	YIL132C	YOR133W	YBL078C
YOL057W	YLR348C	YDL147W	YER115C	YER073W
YNL307C	YCL043C	YBL033C	YER119C	YPL123C
YNR067C	YGR240C-A	YER165W	YOR344C	YGR208W
YER014W	YGR238C	YCL009C	YPR067W	YKL133C
YPL158C	YHR099W	YCL011C	YLR309C	YPR002W
YLR064W	YHR102W	YPL160W	YBR170C	YNL125C
YLL018C-A	YHR105W	YPL168W	SCR1	YOR212W
	YJR060W	YMR196W	YPL246C	YER175C
	YKL173W	YJL057C	YPR079W	YLL039C
	YKL176C	YBR121C	YJR012C	YDR502C
	YDR478W	YPL181W	YKR101W	YDR191W
	YDR471W	YGR264C	YJR129C	YJL082W
	YOL005C	YIL162W	YIL109C	YIL020C
	YOL006C	YBL085W	YDR383C	YNL178W
	YOL002C	YBL078C	YDL104C	YBR182C
	YDR270W	YBL076C	YLL003W	YCR061W
	YDR023W	YKR092C	YBL055C	YKR005C
	YDR214W	YOR271C	YER149C	YNL007C
	YDR213W	YOL068C	YOR301W	YNL009W
	YKL012W	YDR111C	YBR272C	YER103W
	YGL065C	YPL123C	YBR274W	YBR241C
	YGL063W	YPL120W	YPR108W	YKL050C
	YJR094W-A	YOR173W	YMR097C	YDR399W
	YOR224C	YFR003C	YFL016C	YNL073W
	YOR222W	YML018C	YOL152W	YLR180W
	YOR227W	YER056C	YOL151W	YLR179C
	YLR436C	YMR276W	YOL143C	YEL017C-A
	YJR093C	YNL214W	YJL212C	YLR136C
	YNL290W	YJR148W	YGL223C	YPR158W
	YLR441C	YBR283C	YBL039W-B	YKR104W
	YMR176W	YKL135C	YER162C	YNL305C
	YMR067C	YKL133C	YNL063W	YAL005C
	YNL271C	YPR003C	YLR213C	YPL036W
	YGR214W	YMR217W	YLR214W	YER062C
	YKL008C	YFL030W	YCL012C	YKR067W
	YJR047C	YDR427W	YEL029C	YPL154C
	YJR046W	YOR019W	YMR191W	YBR053C
	YDR495C	YOR020W-A	YAL015C	YNL202W
	YDR492W	YER021W	YIL143C	YKR050W
	YDR498C	YOR216C	YIL144W	YBR293W
	YJL084C	YNL097C-B	YIL146C	YGR240C-A
	YOR369C	YGR253C	YDL176W	YCL025C
	YOR363C	YNL077W	YPR128C	YFR035C
	YOR371C	YBR263W	YML066C	YGR153W
	YOR014W	YDR231C	YLR037C	YLR332W
	YIL052C	YOR259C	YLL063C	YLR031W
	YIL051C	YGL248W	YOL089C	YHR143W
	YDR254W	YGL250W	YKR022C	YOR114W
	YDL035C	YCL034W	YLR098C	YDL101C
	YDR195W	YGR231C	YIR018W	YNL327W
	YDR201W	YKL162C	YIR015W	YGR061C
	YCR028C-A	YDR479C	YIL163C	YIL129C
	YCR031C	YDR289C	YIL164C	YAL012W
	YCR032W	YGL048C	YDR372C	YIL163C
	YIR006C	YLL039C	YLR457C	YER069W
	YJL158C	YFR050C	YBL080C	YMR041C
	YHR193C	YFR052W	YER073W	YER055C
	YHR191C	YGR094W	YMR041C	YNL220W
	YHR192W	YJL103C	YKR093W	YER042W
	YKL095W	YDR266C	YER004W	YDR069C
	YMR237W	YDR191W	YER007W	YNL097C-B
	YPL178W	YDR189W	YPL047W	YNL257C
	YGL038C	YER086W	YPL041C	YGL234W
	YGL044C	YER089C	YFR005C	YBR233W-A
	YLL050C	YHR204W	YDL213C	YMR186W
	YLL048C	YJL082W	YNL191W	YBL029W
	YLL053C	YIL020C	YHR003C	YDR263C
	YLL054C	YBR207W	YPR162C	YER091C
	YLL045C	YBR203W	YER060W	YGL028C
	YMR155W	YDL007W	YLR423C	YNL046W
	YMR162C	YBR112C	YER042W	YAL037W
	YFR040W	YGL091C	YPL265W	YLR303W
	YFR035C	YNR007C	YOL033W	YOR128C
	YLR144C	YOR067C	YOL034W	YLR286C
	YNL038W	YDR310C	YOL031C	YER124C
	YNL039W	YJL178C	YLR091W	YMR083W
	YHR160C	YEL036C	YDR072C	YDR441C
	YGR102C	YML097C	YHR075C	YNL301C
	YGR105W	YNL007C	YKR048C	YBR158W
	YGR106C	YNL006W	YDR434W	YOR264W
	YML053C	YJR147W	YNL119W	YFR032C
	YJR105W	YJR141W	YDR047W	YNR067C
	YDR510W	YIL064W	YER026C	YML130C
	YDR515W	YML004C	YMR066W	YER081W
	YJL065C	YJL099W	YOR210W	YER061C
	YPR021C	YOR108W	YOR209C	YER060W-A
	YIL027C	YDR394W	YGR222W	YPL158C
	YIL030C	YDR395W	YOR037W	YGR204W
	YIL031W	YMR301C	YDR252W	YBR265W
	YLR032W	YBL064C	YOR107W	YOR136W
	YDR315C	YKL181W	YLR363C	YIL107C
	YDR317W	YOR307C	YJL139C	YOR303W
	YBR162W-A	YDR341C	YJL133C-A	YBR085W
	YBR164C	YDR415C	YIL006W	YNL067W
	YDR180W	YER143W	YIR002C	YHL033C
	YDR177W	YNL068C	YDR020C	YKR093W
	YDR174W	YNL073W	YBR228W	YKR083C
	YCR051W	YGL011C	YMR187C	YDR066C
	YER100W	YML087C	YMR184W	YKL128C
	YER102W	YML092C	YLR411W	YNL078W
	YHR176W	YDR358W	YCL028W	YKL185W
	YHR178W	YNL321W	YCL029C	YGR097W
	YHR181W	YML054C	YER175C	YJL088W
	YGL103W	YBR152W	YER173W	YBR187W
	YGL101W	YAL028W	YJR052W	YHR144C
	YGL100W	YDR379C-A	YDR481C	YGL012W
	YLR086W	YFL022C	YJL116C	YNL320W
	YJR070C	YNL291C	YOR380W	YBL095W
	YJR069C	YDL126C	YFR018C	YBR129C
	YLR403W	YBR089C-A	YDR034C	YHR041C
	YPL273W	YNL305C	YKL186C	YJR010W
	YPL272C	YER012W	YLR115W	YLR348C
	YMR137C	YAL005C	YPR009W	YKL008C
	YMR143W	YMR243C	YIL040W	YER095W
	YMR142C	YDL229W	YIL037C	YDR533C
	YGR284C	YOL044W	YDR267C	YKL069W
	YOR152C	YLR432W	YCR024C-B	YIL144W
	YOR153W	YDR119W	YER091C	YDL179W
	YOR155C	YHR028C	YMR150C	YPR128C
	YOR156C	YMR265C	YPR199C	YDR089W
	YNL054W	YNL183C	YDL002C	YJL153C
	YNL051W	YER062C	YDR173C	YOR107W
	YGR154C	YJL031C	YAL037W	YGR041W
	YJR089W	YMR053C	YDL049C	YDR033W
	YJR055W	YKR067W	YDL047W	YOR229W
	YDR536W	YDR059C	YGR133W	YNL031C
	YHR021C	YKL124W	YDR541C	YNL030W
	YPR187W	YHR047C	YEL071W	YJL078C
	YPR180W	YJR124C	YOR358W	YDL049C
	YPR185W	YMR210W	YPR049C	YOR066W
	YOR321W	YMR209C	YIL085C	YHR146W
	YOR319W	YBR053C	YLR303W	YDL085C-A
	YPR032W	YNL212W	YBR182C	YLR164W
	YPR035W	YNL209W	YGR080W	YGL010W
	YIL090W	YER047C	YCR068W	YML054C
	YIL089W	YDL185W	YCR066W	YIL155C
	YDR378C	YJL001W	YOL022C	YDR374W-A
	YDR379W		YEL038W	YLR432W
	YNR021W		YOR126C	YPL049C
	YDR292C		YML070W	YHR047C
	YDR297W		YOR297C	YER045C
	YLR333C		YPR075C	YMR016C
	YBR191W		YLR287C	YKL164C
	YDR158W		YBR241C	YIL051C
	YDR160W		YIL102C-A	YJL158C
	YDR159W		YDL088C	YCR048W
	YNL162W		YLR027C	YCR053W
	YNL163C		YPL229W	YMR120C
	YMR116C		YLR164W	YOR344C
	YKL006W		YLR264W	YLR174W
	YHR159W		YOL119C	YEL065W
	YGR086C		YBR227C	YBR079C
	YHR158C		YBR218C	YDR410C
	YHR155W		YHR133C	YBL039W-B
	YHR162W		YIL121W	YNL066W
	YCR073C		YDL161W	YLL056C
	YBR073W		YLL001W	YLR037C
	YLR448W		YGL155W	YAL001C
	YLR447C		YMR112C	YBR071W
	YMR121C		YLR180W	YGR035W-A
	YKL006C-A		YOL133W	YJR148W
	YMR120C		YFL041W	YDR072C
	YKL005C		YGR055W	YMR066W
	YOR131C		YIR027C	YJL132W
	YDL061C		YIR025W	YKR080W
	YDL064W		YGL008C	YLR411W
	YDL058W		YGL010W	YDR504C
	YDL055C		YMR204C	YCR068W
	YLR035C		YPL074W	YEL038W
	YML081C-A		YDR362C	YMR300C
	YLR029C		YDL182W	YBL064C
	YLR030W		YLL013C	YHR049W
	YLR031W		YNL320W	YKL029C
	YML078W		YNL322C	YAR015W
	YML077W		YML054C-A	YGL157W
	YML076C		YOL159C	YGR048W
	YER117W		YCL005W	YPL177C
	YER118C		YCR005C	YAL048C
	YER120W		YGL005C	YLR058C
	YGR141W		YIR011C	YPL274W
	YGR142W		YPL174C	YER035W
	YGR136W		YIL153W	YGL174W
	YJR134C		YIL155C	YOR184W
	YPL258C		YDR376W	YBR021W
	YKR074W		YMR087W	YBR013C
	YOR349W		YLR452C	YOL002C
	YPR063C		YPR158W	YMR180C
	YPR062W		YGR167W	YJR047C
	YPR058W		YLR225C	YHR160C
	YPR056W		YGR260W	YJR073C
	YIL073C		YLR134W	YDR531W
	YIL075C		YMR244W	YHR159W
	YIL074C		YML131W	YML081C-A
	YIL069C		YHL003C	YLR030W
	YIL067C		YGR058W	SCR1
	YLR310C		YJL049W	YOL152W
	YLR318W		YOL038W	YOL151W
	YBR249C		YNR050C	YDR408C
	YBR248C		YPL138C	YAL062W
	YBR253W		YKL145W	YGL163C
	YBR252W		YPL049C	YPL199C
	YBR254C		YPL051W	YLL063C
	YHR141C		YMR271C	YIL164C
	YHR139C		YML112W	YIL169C
	YGL195W		YCR105W	YHL012W
	YEL044W		YER060W-A	YHR033W
	YEL051W		YJL035C	YMR030W
	YEL049W		YKR069W	YOL049W
	YOR115C		YPL154C	YHR091C
	YOR109W		YHR045W	YNL098C
	YDR025W		YAL048C	YOL012C
	YDL081C		YML011C	YLR019W
	YDL084W		YJL012C	YGR043C
	YDL083C		YPL274W	YOR377W
	YDL082W		YBR295W	YFR018C
	YMR312W		YBR289W	YCR014C
	YLR015W		YGR169C	YLR109W
	YER134C			YMR150C
	YPL240C			YNL045W
	YPR085C			YOR332W
	YPR080W			YBR114W
	YPR082C			YGL087C
	YML082W			YIL055C
	YML081W			YNL068C
	YJR010C-A			YPR118W
	YJR014W			YIR027C
	YJR016C			YGL009C
	YLR034C			YBL106C
	YLR176C			YHL047C
	YLR174W			YML052W
	YLR172C			YIL158W
	YLR167W			YNL307C
	YOL130W			YGR258C
	YOL127W			YMR271C
	YBR235W			YER063W
	YBR098W			YMR053C
	YHR121W			YKR061W
	YLR070C			YKL220C
	YLR359W			YDR044W
	YLR362W			YBR294W
	YLR077W			YJR061W
	YLR075W			YDR270W
	YJL192C			YDR515W
	YJL189W			YOR153W
	YJL190C			YER115C
	YJL184W			YMR184W
	YJL185C			YIL121W
	YEL065W			YIL074C
	YKL039W			YIL043C
	YAR042W			YIL018W
	YOR096W			YIL083C
	YOR093C			YBR073W
	YIL108W			YGR238C
	YDR382W			YHR021C
	YDR389W			YMR116C
	YDR386W			YJL190C
	YDL100C			YER169W
	YLL005C			YPL079W
	YNL325C			YBR033W
	YER146W			YJR149W
	YER147C			YOR190W
	YGL140C			YLR299W
	YGL141W			YLR344W
	YGL142C			YPL216W
	YKL215C			YFL007W
	YKL214C			YDL223C
	YKL210W			YGR085C
	YPL225W			YLR061W
	YOR304W			YNL204C
	YPR102C			YHR176W
	YMR105W-A			YFL054C
	YMR100W			YLR267W
	YFL017W-A			YCR105W
	YFL018C			YLR214W
	YLR189C			YPR035W
	YLR268W			YLR213C
	YOL149W			YGL186C
	YOL146W			YMR230W
	YBR084C-A			YDR454C
	YBR082C			YDR471W
	YGR061C			YJR094W-A
	YJL207C			YCR031C
	YJL214W			YLL045C
	YJL210W			YMR143W
	YKL069W			YBR191W
	YKL072W			YPR063C
	YKL073W			YHR141C
	YNR068C			YLR167W
	YGL020C			YOL127W
	YKL020C			YER146W
	YPL065W			YGL141W
	YIL133C			YKL214C
	YIL129C			YIL148W
	YGL226C-A			YGL189C
	YDR404C			YGR027C
	YDR408C			YHL015W
	YDR410C			YER009W
	YNL302C			YER057C
	YLL027W			YPL143W
	YBL037W			YDL243C
	YBL040C			YJL136C
	YER169W			YDR224C
	YER166W			YMR304W
	YAL062W			YGR233C
	YNL067W			YML026C
	YGL167C			YJL121C
	YGL163C			YOR234C
	YPR115W			YLR110C
	YPR113W			YHR208W
	YPL198W			YHR203C
	YPL199C			YNL172W
	YLR220W			YGR034W
	YLR216C			YLR406C
	YBR140C			YGL076C
	YCL008C			YJL177W
	YCL005W-A			YDL075W
	YDR150W			YPL249C-A
	YGR009C			YOR293W
	YGR010W			YBR244W
	YPL159C			YER131W
	YEL025C			YOR312C
	YEL026W			YLR388W
	YEL027W			YNL069C
	YMR194W			YGL147C
	YMR192W			YDR139C
	YMR195W			YPL096C-A
	YAL012W			YBL092W
	YPL079W			YPL131W
	YPL085W			YJR123W
	YIL151C			YBL027W
	YIL149C			YDR450W
	YIL147C			YCL038C
	YIL148W			YOR224C
	YIL145C			YJR008W
	YDR354W			YHR193C
	YDR350C			YLR333C
	YDR348C			YLR029C
	YDL136W			YDR025W
	YDL175C			YPR102C
	YDL178W			YLR043C
	YLR438C-A			YBR126W-A
	YBL098W			YNR046W
	YBL102W			YFL055W
	YHL036W			YER044C-A
	YHL033C			YGL123W
	YHL030W			YBR011C
	YGL186C			YJR145C
	YGL189C			YLR287C-A
	YPR132W			YOR315W
	YPR131C			YDR418W
	YER072W			YHL043W
	YLL056C			YDL208W
	YML073C			YBL087C
	YJL062W			YDL149W
	YLR043C			YFR031C-A
	YLR040C			YOL039W
	YJL059W			YOR167C
	YKR098C			YHL040C
	YLR228C			YIL052C
	YLR234W			YLL053C
	YLR240W			YMR142C
	YNR060W			YNL162W
	YNR055C			YCL005W-A
	YBR127C			YDL191W
	YBR126W-A			YPL220W
	YBR118W			YMR034C
	YKR023W			YLR247C
	YLR352W			YNR070W
	YGR027C			YGR020C
	YGR030C			YPL037C
	YLR106C			YOR182C
	YML062C			YHR105W
	YGR270W			YLR441C
	YGR271W			YOR369C
	YGR267C			YOR152C
	YAL001C			YER117W
	YAR002C-A			YBR252W
	YPL019C			YBR084C-A
	YPL018W			YLR438C-A
	YPL017C			YKL156W
	YIL169C			YLR048W
	YFL017C			YKR057W
	YDR369C			YFL033C
	YDR367W			YBL018C
	YBR058C-A			YMR242C
	YBR065C			YDR500C
	YDL199C			YGL031C
	YDL198C			YJL077W-B
	YDL200C			YOR338W
	YDL192W			YLR325C
	YDL191W			YPR052C
	YBL075C			YEL034W
	YBL074C			YGL135W
	YGL200C			YOL120C
	YHL010C			YGL156W
	YHL012W			YPR036W-A
	YHL013C			YIR015W
	YHL015W			YIR002C
	YBR261C			YIL119C
	YBR259W			YEL025C
	YDR012W			YGL247W
	YER069W			YDR214W
	YDR014W			YDR213W
	YER074W			YJR046W
	YER074W-A			YJL084C
	YER075C			YDR258C
	YKR096W			YFR042W
	YKR094C			YMR136W
	YOR276W			YGR284C
	YNR039C			YIL089W
	YNR046W			YHR162W
	YLR150W			YDL061C
	YDR104C			YGR141W
	YDR109C			YDL081C
	YPL125W			YDL083C
	YER011W			YLR034C
	YER007C-A			YLR359W
	YER009W			YJL185C
	YER008C			YOR096W
	YKL093W			YDR382W
	YKL090W			YLR189C
	YKL088W			YFL016C
	YHR039C-A			YJL214W
	YAL053W			YKL073W
	YHR033W			YIL133C
	YHR035W			YLR216C
	YPL048W			YMR195W
	YKR035W-A			YBL098W
	YKR031C			YPR132W
	YOR174W			YJL059W
	YMR260C			YLR234W
	YFR001W			YLR352W
	YFR006W			YDL199C
	YML115C			YBL075C
	YDL220C			YDR012W
	YDL219W			YER074W
	YDL218W			YDL218W
	YNL190W			YKR076W
	YHR005C			YMR272C
	YPR164W			YGL203C
	YPR165W			YLR337C
	YML019W			YDR073W
	YML016C			YOR027W
	YJR068W			YBR048W
	YER057C			YNL241C
	YER056C-A			YDR047W
	YER055C			YDR225W
	YKR076W			YHR010W
	YMR030W			YOR339C
	YBR071W			YGL089C
	YBR070C			YPR043W
	YOL049W			YOR063W
	YOL051W			YBR189W
	YLR420W			YGL071W
	YDR123C			YML024W
	YBR171W			YBL072C
	YPL143W			YOL121C
	YKL156W			YFL041W
	YPL144W			YGL013C
	YMR272C			YPL090C
	YMR273C			YOL060C
	YMR275C			YLL024C
	YMR279C			YNR065C
	YFL054C			YFL034C-A
	YFL055W			YJL034W
	YFL050C			YDR447C
	YLR048W			YLR064W
	YLR047C			YDL130W
	YML029W
	YBR031W
	YBR033W
	YDL243C
	YBR023C
	YBR025C
	YNL220W
	YER041W
	YER038C
	YER044C-A
	YKR059W
	YMR086W
	YKR057W
	YAL058W
	YKR083C
	YGL203C
	YJR149W
	YOL028C
	YOL026C
	YLR096W
	YLR337C
	YLR092W
	YBR286W
	YDR073W
	YDR071C
	YDR069C
	YDR068W
	YDR067C
	YDR066C
	YGR206W
	YGR207C
	YGR208W
	YKL128C
	YHR072W-A
	YHR068W
	YPR002W
	YPL005W
	YJR110W
	YJR118C
	YMR223W
	YMR219W
	YDR432W
	YFL033C
	YDR429C
	YDR424C
	YOR027W
	YOR022C
	YPL220W
	YBR048W
	YNL244C
	YNL242W
	YNL241C
	YNL125C
	YBL022C
	YBL020W
	YBL018C
	YDR049W
	YDR051C
	YER019C-A
	YOR207C
	YOR212W
	YDR089W
	YDR086C
	YDR092W
	YNR035C
	YNR032C-A
	YPL108W
	YPL099C
	YHR091C
	YHR089C
	YMR010W
	YJL153C
	YMR242C
	YMR236W
	YOR045W
	YOR040W
	YBL006C
	YBL005W
	YNL098C
	YNL099C
	YNL101W
	YNL256W
	YNL255C
	YML022W
	YNL264C
	YNL257C
	YJR057W
	YGL119W
	YGL123W
	YOR189W
	YOR191W
	YOR190W
	YOR192C
	YLR299W
	YGL234W
	YGL233W
	YGL232W
	YGL231C
	YLR361C
	YLR072W
	YLR071C
	YLR367W
	YCL057W
	YCL050C
	YGR252W
	YHR110W
	YHR114W
	YDR468C
	YJL140W
	YJL138C
	YJL136C
	YJL132W
	YOL012C
	YIL002C
	YIL005W
	YBR011C
	YBR008C
	YNL079C
	YNL084C
	YDR019C
	YDR016C
	YDR013W
	YDR224C
	YDR225W
	YDR226W
	YDR228C
	YDR232W
	YDR233C
	YLR019W
	YKR080W
	YLR021W
	YMR304W
	YBR231C
	YBR233W-A
	YJR090C
	YBR229C
	YGR043C
	YJL039C
	YOR257W
	YOR256C
	YOR253W
	YOR251C
	YMR183C
	YMR186W
	YLR128W
	YLR340W
	YLR344W
	YGR233C
	YER174C
	YER172C
	YER176W
	YER175W-A
	YML026C
	YKL160W
	YML020W
	YDR482C
	YDR483W
	YDR485C
	YDR488C
	YJL121C
	YOR376W-A
	YOR377W
	YOR003W
	YOR007C
	YFR019W
	YDR291W
	YDR283C
	YDR288W
	YDR285W
	YDR033W
	YDR210W
	YCR014C
	YBL029W
	YGL055W
	YGL050W
	YLL033W
	YLL032C
	YOR232W
	YOR234C
	YOR229W
	YOR236W
	YGR218W
	YGR118W
	YMR164C
	YFR044C
	YLR114C
	YLR110C
	YLR109W
	YLR398C
	YLR107W
	YNL031C
	YNL030W
	YNL029C
	YGR097W
	YGR093W
	YJR043C
	YJR035W
	YDR502C
	YDR500C
	YJL102W
	YMR289W
	YPR004C
	YPR008W
	YIL043C
	YDR263C
	YLR393W
	YMR006C
	YML001W
	YCR026C
	YCR024C-A
	YER087C-B
	YER093C
	YHR208W
	YHR201C
	YHR203C
	YGL031C
	YGL030W
	YLR396C
	YMR154C
	YJL088W
	YFR032C-A
	YGR148C
	YJR098C
	YML058W
	YOR388C
	YDR524C-B
	YDR524W-C
	YJL081C
	YJL077W-B
	YHR010W
	YHR013C
	YPR198W
	YOR332W
	YOR338W
	YOR339C
	YPR028W
	YPR024W
	YMR167W
	YIL018W
	YLR329W
	YDR320C-A
	YDR320C
	YLR320W
	YLR325C
	YBR205W
	YDR169C
	YDR167W
	YDR170C
	YNL178W
	YNL172W
	YKL154W
	YPL145C
	YMR038C
	YCR042C
	YCR043C
	YMR033W
	YMR034C
	YHR182W
	YHR186C
	YBR114W
	YBR109C
	YGL089C
	YAL033W
	YGR034W
	YKL010C
	YMR126C
	YLR406C
	YLR405W
	YOR143C
	YNR010W
	YDL054C
	YDL051W
	YDL052C
	YEL072W
	YPR052C
	YPR043W
	YPR045C
	YOR063W
	YOR059C
	YIL083C
	YDR308C
	YDR305C
	YDR304C
	YBR187W
	YBR182C-A
	YBR181C
	YBR189W
	YHR164C
	YHR165C
	YHR168W
	YGR077C
	YGR074W
	YCR061W
	YCR067C
	YGL071W
	YGL073W
	YGL070C
	YGL076C
	YJL173C
	YJL179W
	YJL177W
	YEL034W
	YML024W
	YKR005C
	YKR001C
	YOR123C
	YOR122C
	YOR127W
	YOR128C
	YML099C
	YNL010W
	YNL012W
	YNL009W
	YNL008C
	YDL067C
	YDL075W
	YML067C
	YER103W
	YER107C
	YER112W
	YPL249C-A
	YJR139C
	YJR138W
	YJR140C
	YJR145C
	YOR296W
	YOR293W
	YOR290C
	YOR291W
	YIL055C
	YML002W
	YLR285W
	YLR287C-A
	YML007W
	YDL236W
	YDL238C
	YBR237W
	YBR244W
	YHR146W
	YHR144C
	YCR093W
	YJL206C
	YJL204C
	YJL197W
	snR80
	YEL054C
	YKL050C
	YKL056C
	YJL097W
	YOR106W
	YOR104W
	YOR103C
	YOR099W
	YDR399W
	YDL085C-A
	YDL092W
	YDL087C
	YMR300C
	YBL066C
	YBL068W
	YBL072C
	YER128W
	YER131W
	YGL135W
	YGL133W
	YKL180W
	YPL237W
	YPL234C
	YOR311C
	YOR308C
	YOR315W
	YOR312C
	YDL168W
	YJR024C
	YDR338C
	YDR345C
	YLR267W
	YLR264C-A
	YLR260W
	YLR262C
	YLR262C-A
	YKL119C
	YOL120C
	YOL121C
	YMR083W
	YBR221C
	YHR128W
	YGR037C
	YKL058W
	YEL003W
	YEL001C
	YKL029C
	YKL038W
	YKL032C
	YKL033W-A
	YKL033W
	YLR388W
	YAR015W
	YAR020C
	YAR019C
	YLR394W
	YOR085W
	YOR079C
	YIL119C
	YIL115C
	YGL206C
	YDR422C
	YDR421W
	YDR419W
	YDR418W
	YDL109C
	YMR317W
	YLR001C
	YNL074C
	YNL069C
	YGL148W
	YGL151W
	YGL150C
	YGL156W
	YGL157W
	YPR118W
	YPL216W
	YKL207W
	YLR185W
	YLR179C
	YGL147C
	YLR241W
	YLR247C
	YLR245C
	YGR285C
	YOL102C
	YOL098C
	YOL097C
	YOL135C
	YDR441C
	YDR443C
	YEL009C
	YMR068W
	YDR138W
	YDR139C
	YDR135C
	YGR048W
	YIR022W
	YEL018W
	YEL017C-A
	YEL021W
	YEL023C
	YEL020C
	YGL009C
	YGL012W
	YGL013C
	YIL138C
	YML094W
	YNL294C
	YDR363W
	YDL184C
	YNL301C
	YNL316C
	YLL014W
	YBL106C
	YER156C
	YER155C
	YER161C
	YLR136C
	YGL173C
	YGL172W
	YHL043W
	YHL047C
	YPR139C
	YLR199C
	YML049C
	YML052W
	YOL078W
	YML036W
	YBR154C
	YCR002C
	YCL002C
	YGR002C
	YGR001C
	YGL002W
	YPL177C
	YNL135C
	YAL029C
	YPL098C
	YPL096C-A
	YPL090C
	YIL156W
	YIL158W
	YMR091C
	YDR374W-A
	YDL208W
	YNL293W
	YLR453C
	YBL091C
	YBL095W
	YBL092W
	YBL087C
	YHL024W
	YDL127W
	YDL125C
	YDL149W
	YKR104W
	YLR226W
	YFR031C-A
	YOL139C
	YBR087W
	YFR032C
	YOL056W
	YOL060C
	YOL138C
	YLL024C
	YNR070W
	YNR065C
	YBR129C
	YGR020C
	YGR017W
	YKL080W
	YKL081W
	YER016W
	YER013W
	YGR258C
	YGR263C
	YGR262C
	YAL003W
	YAL007C
	YAL002W
	YPL036W
	YPL037C
	YLR133W
	YMR247C
	YFL005W
	YFL007W
	YML130C
	YMR036C
	YDL223C
	YHL001W
	YPR170W-B
	YDR143C
	YER081W
	YBR167C
	YDL013W
	YOL036W
	YOL045W
	YOL039W
	YOL040C
	YGR085C
	YFL034C-A
	YFL038C
	YLR433C
	YLR431C
	YLR430W
	YPL131W
	YPL129W
	YKL146W
	YHR025W
	YHR027C
	YHR026W
	YOR164C
	YOR159C
	YOR167C
	YDL018C
	YML103C
	YML105C
	YML106W
	YML108W
	YBR041W
	YNL187W
	YNL155W
	YNL151C
	YNL147W
	YER061C
	YER063W
	YJL034W
	YKR061W
	YKR068C
	YML056C
	YKL220C
	YMR054W
	YML063W
	YKL222C
	YDR063W
	YDR064W
	YDR057W
	YKL122C
	YHR041C
	YAL044C
	YJR123W
	YPL218W
	YMR213W
	YFL039C
	YDR447C
	YFL045C
	YDR438W
	YLR061W
	YLR057W
	YLR058C
	YLR066W
	YLR065C
	YNL204C
	YNL202W
	YBL026W
	YBL027W
	YML012W
	YDR044W
	YER045C
	YGR202C
	YKR050W
	YKL098W
	YKR043C
	YDL132W
	YDL130W
	YDL135C
	YDL133C-A
	YOR196C
	YOR202W
	YLL018C
	YBR293W
	YBR294W
	YBR288C
	YDR080W
	YDR079C-A
	YGR007W
	YGR170W
	YGR204W
	YPL008W
	YHR063C
	YPL009C
	YPL010W
	YMR124W
