# Supplementary material for: Improved redox homeostasis owing to the up-regulation of one-carbon metabolism and related pathways is crucial for yeast heterosis at high temperature
Source: HighWire-hosted journal article supplement (doi:10.1101/gr.262055.120), 2021-03-15
Supplement: Supplemental_Table_S8.xlsx [file Supplemental_Table_S8.xlsx]

## Sheet: (a) NAGs < MPV
Table S8. GO terms significantly overrepresented in the non-additive genes (NAGs) in the F1 hybrids of S. cerevsisiae with expression levels lower (a) and higher (b) than the average expression levels (MPV) of the genes in their parents
Grouping	Term	Description	Log P	Log (q value)	No. in analyzed list/ No. in reference list	Genes
1_Summary	GO:0006458	'de novo' protein folding	-7.78785	-4.11539	10/25	MDJ1,SSA2,SSA1,SSA3,KAR2,LHS1,HSC82,SIS1,HSP82,SSA4,ATG8,VID24,VPS62,STI1,IMP1,YNR065C,ATG13,PEX18,SCR1,AFB1,MID2,MF(ALPHA)2,UFD1,IML2,STE4,BXI1,YPL216W,GPA1,STE14,HUL5,PDR5,ADD37,MIG3,HBN1,RIM15,AHP1,ECM38,HSP31,PRX1,GPX2,PDR1,NQM1,ASK10,ECM4,CUZ1,PSR2,AHA1,HSP78,SMP1,MCK1,CUR1,GPP2,AYT1,DOA4,FUR4,QDR2,ZWF1,PDR18,AVT6,CPR6,SDH8,BTN2,ERO1,FMO1
1_Member	GO:0006458	'de novo' protein folding	-7.78785	-4.11539	10/25	MDJ1,SSA2,SSA1,SSA3,KAR2,LHS1,HSC82,SIS1,HSP82,SSA4
1_Member	GO:0006605	protein targeting	-2.18594	-0.398084	16/202	SSA2,SSA1,ATG8,SSA3,VID24,VPS62,KAR2,LHS1,STI1,IMP1,YNR065C,HSP82,ATG13,PEX18,SSA4,SCR1
1_Member	GO:0070972	protein localization to endoplasmic reticulum	-2.1911	-0.398218	7/56	SSA2,SSA1,SSA3,KAR2,LHS1,SSA4,SCR1
1_Member	GO:0071310	cellular response to organic substance	-2.26881	-0.43353	16/198	SSA2,AFB1,MID2,SSA1,SSA3,MF(ALPHA)2,UFD1,IML2,KAR2,LHS1,STE4,BXI1,SIS1,YPL216W,GPA1,SSA4
1_Member	GO:0010033	response to organic substance	-2.68105	-0.759853	21/267	SSA2,AFB1,MID2,SSA1,STE14,SSA3,HUL5,MF(ALPHA)2,UFD1,IML2,KAR2,LHS1,PDR5,STE4,ADD37,BXI1,SIS1,YPL216W,GPA1,MIG3,SSA4
1_Member	GO:0072599	establishment of protein localization to endoplasmic reticulum	-2.98449	-1.02797	7/41	SSA2,SSA1,SSA3,KAR2,LHS1,SSA4,SCR1
1_Member	GO:0045047	protein targeting to ER	-3.05105	-1.07186	7/40	SSA2,SSA1,SSA3,KAR2,LHS1,SSA4,SCR1
1_Member	GO:0006986	response to unfolded protein	-3.14489	-1.15788	8/50	SSA2,MID2,SSA1,SSA3,KAR2,LHS1,BXI1,SSA4
1_Member	GO:0070887	cellular response to chemical stimulus	-3.21753	-1.18973	29/385	HBN1,RIM15,SSA2,AFB1,AHP1,ECM38,MID2,SSA1,HSP31,SSA3,PRX1,GPX2,MF(ALPHA)2,PDR1,NQM1,UFD1,ASK10,IML2,KAR2,LHS1,ECM4,STE4,BXI1,CUZ1,SIS1,YPL216W,GPA1,MIG3,SSA4
1_Member	GO:0009628	response to abiotic stimulus	-3.62287	-1.53894	19/194	RIM15,MDJ1,SSA2,PSR2,MID2,SSA1,AHA1,HSP78,SSA3,SMP1,KAR2,LHS1,HSC82,MCK1,HSP82,CUR1,MIG3,GPP2,SSA4
1_Member	GO:0034620	cellular response to unfolded protein	-3.68315	-1.56671	8/42	SSA2,MID2,SSA1,SSA3,KAR2,LHS1,BXI1,SSA4
1_Member	GO:0042221	response to chemical	-3.69257	-1.56671	40/566	HBN1,RIM15,SSA2,AYT1,AFB1,AHP1,ECM38,MID2,SSA1,DOA4,STE14,HSP31,SSA3,PRX1,FUR4,GPX2,HUL5,MF(ALPHA)2,PDR1,NQM1,UFD1,ASK10,IML2,KAR2,LHS1,ECM4,PDR5,STE4,QDR2,ADD37,BXI1,ZWF1,CUZ1,SIS1,PDR18,YPL216W,GPA1,MIG3,SSA4,AVT6
1_Member	GO:0006613	cotranslational protein targeting to membrane	-3.78276	-1.63517	6/22	SSA2,SSA1,SSA3,KAR2,SSA4,SCR1
1_Member	GO:0006612	protein targeting to membrane	-2.10753	-0.353279	7/58	SSA2,SSA1,SSA3,KAR2,LHS1,SSA4,SCR1
1_Member	GO:0006616	SRP-dependent cotranslational protein targeting to membrane, translocation	-4.01796	-1.82206	5/13	SSA2,SSA1,SSA3,KAR2,SSA4
1_Member	GO:0035966	response to topologically incorrect protein	-4.06122	-1.85236	11/70	SSA2,MID2,SSA1,SSA3,UFD1,IML2,KAR2,LHS1,BXI1,SIS1,SSA4
1_Member	GO:0035967	cellular response to topologically incorrect protein	-4.56785	-2.33183	11/62	SSA2,MID2,SSA1,SSA3,UFD1,IML2,KAR2,LHS1,BXI1,SIS1,SSA4
1_Member	GO:0009266	response to temperature stimulus	-5.43508	-2.95551	15/94	RIM15,MDJ1,SSA2,PSR2,SSA1,AHA1,HSP78,SSA3,KAR2,LHS1,HSC82,MCK1,HSP82,CUR1,SSA4
1_Member	GO:0009408	response to heat	-5.7442	-3.13076	15/89	RIM15,MDJ1,SSA2,PSR2,SSA1,AHA1,HSP78,SSA3,KAR2,LHS1,HSC82,MCK1,HSP82,CUR1,SSA4
1_Member	GO:0061077	chaperone-mediated protein folding	-5.94959	-3.30139	8/22	MDJ1,SSA2,SSA1,SSA3,KAR2,LHS1,SIS1,SSA4
1_Member	GO:0034605	cellular response to heat	-5.94985	-3.30139	14/75	RIM15,SSA2,PSR2,SSA1,AHA1,HSP78,SSA3,KAR2,LHS1,HSC82,MCK1,HSP82,CUR1,SSA4
1_Member	GO:0051085	chaperone cofactor-dependent protein refolding	-6.75298	-3.80375	8/18	MDJ1,SSA2,SSA1,SSA3,KAR2,LHS1,SIS1,SSA4
1_Member	GO:0051084	'de novo' posttranslational protein folding	-6.75298	-3.80375	8/18	MDJ1,SSA2,SSA1,SSA3,KAR2,LHS1,SIS1,SSA4
1_Member	GO:0006457	protein folding	-7.06224	-3.81198	19/114	MDJ1,SSA2,CPR6,SSA1,AHA1,HSP78,SSA3,SDH8,BTN2,KAR2,LHS1,STI1,ERO1,HSC82,SIS1,HSP82,CUR1,FMO1,SSA4
1_Member	GO:0042026	protein refolding	-7.54174	-4.11539	11/33	MDJ1,SSA2,CPR6,SSA1,HSP78,SSA3,KAR2,LHS1,HSC82,HSP82,SSA4
1_Member	GO:0006614	SRP-dependent cotranslational protein targeting to membrane	-3.90647	-1.7354	6/21	SSA2,SSA1,SSA3,KAR2,SSA4,SCR1
2_Summary	GO:0055114	oxidation-reduction process	-6.32334	-3.5502	41/457	HBN1,CIT2,ADH7,FET5,XYL2,AHP1,SHH4,IDP2,FRE1,GDH3,AAD4,PRX1,GPX2,ARI1,ERG4,MPO1,MET3,YJR149W,FRE2,ECM4,FRE7,GRE2,IDH2,FDH1,GUT2,LYS1,YML131W,ERO1,CYB2,RSF1,ARA2,GOR1,ZWF1,SPS19,IDH1,FRE4,IRC15,YHL012W,FMO1,DLD3,ARG5,6
2_Member	GO:0055114	oxidation-reduction process	-6.32334	-3.5502	41/457	HBN1,CIT2,ADH7,FET5,XYL2,AHP1,SHH4,IDP2,FRE1,GDH3,AAD4,PRX1,GPX2,ARI1,ERG4,MPO1,MET3,YJR149W,FRE2,ECM4,FRE7,GRE2,IDH2,FDH1,GUT2,LYS1,YML131W,ERO1,CYB2,RSF1,ARA2,GOR1,ZWF1,SPS19,IDH1,FRE4,IRC15,YHL012W,FMO1,DLD3,ARG5,6
3_Summary	GO:0006873	cellular ion homeostasis	-6.91983	-3.80375	19/158	FET5,SMF3,TIS11,FRE1,CTR3,CCC2,SLF1,AFT1,YHC3,FRE2,TRK2,FRE7,MAM3,PDR5,FRE4,PMA2,ARN2,ARN1,SIT1,QDR2,AGP1,HXT8,NCA3,AVT6,GEM1,BRR6,BTN2,PDR18,YCR061W,BLM10,AHP1,TOP3,VRP1,HBT1,DOA4,HST4,HSP78,PRX1,RAD54,HUL5,MMS2,KEL2,LHS1,HSC82,UBP15,HSP82,IRC15,RAD51
3_Member	GO:0006873	cellular ion homeostasis	-4.85155	-2.55523	19/158	FET5,SMF3,TIS11,FRE1,CTR3,CCC2,SLF1,AFT1,YHC3,FRE2,TRK2,FRE7,MAM3,PDR5,FRE4,PMA2,ARN2,ARN1,SIT1
3_Member	GO:0000041	transition metal ion transport	-4.8385	-2.55523	10/48	FET5,SMF3,FRE1,CTR3,CCC2,AFT1,FRE2,FRE7,QDR2,FRE4
3_Member	GO:0006826	iron ion transport	-4.82305	-2.55523	7/22	FET5,SMF3,FRE1,AFT1,FRE2,FRE7,FRE4
3_Member	GO:0055065	metal ion homeostasis	-4.82021	-2.55523	16/118	FET5,SMF3,TIS11,FRE1,CTR3,CCC2,SLF1,AFT1,FRE2,TRK2,FRE7,MAM3,FRE4,ARN2,ARN1,SIT1
3_Member	GO:0006812	cation transport	-2.16633	-0.388346	17/221	AGP1,FET5,SMF3,FRE1,CTR3,CCC2,AFT1,HXT8,NCA3,YHC3,FRE2,TRK2,FRE7,QDR2,FRE4,PMA2,AVT6
3_Member	GO:0015677	copper ion import	-4.4343	-2.21207	5/11	FRE1,CTR3,FRE2,FRE7,FRE4
3_Member	GO:0055082	cellular chemical homeostasis	-3.95837	-1.77506	19/183	FET5,SMF3,TIS11,FRE1,CTR3,CCC2,SLF1,AFT1,YHC3,FRE2,TRK2,FRE7,MAM3,PDR5,FRE4,PMA2,ARN2,ARN1,SIT1
3_Member	GO:0030001	metal ion transport	-3.38716	-1.31299	11/83	FET5,SMF3,FRE1,CTR3,CCC2,AFT1,FRE2,TRK2,FRE7,QDR2,FRE4
3_Member	GO:0048878	chemical homeostasis	-4.97255	-2.62538	23/213	FET5,SMF3,TIS11,FRE1,CTR3,GEM1,CCC2,SLF1,BRR6,AFT1,BTN2,YHC3,FRE2,TRK2,FRE7,MAM3,PDR5,FRE4,PDR18,PMA2,ARN2,ARN1,SIT1
3_Member	GO:0065008	regulation of biological quality	-4.66536	-2.41511	43/568	YCR061W,FET5,BLM10,SMF3,AHP1,TIS11,FRE1,TOP3,VRP1,CTR3,GEM1,HBT1,DOA4,HST4,HSP78,CCC2,SLF1,PRX1,BRR6,RAD54,HUL5,MMS2,AFT1,BTN2,KEL2,YHC3,FRE2,LHS1,TRK2,FRE7,MAM3,PDR5,HSC82,UBP15,FRE4,PDR18,HSP82,PMA2,IRC15,ARN2,ARN1,SIT1,RAD51
3_Member	GO:0006825	copper ion transport	-5.13569	-2.75074	7/20	FRE1,CTR3,CCC2,FRE2,FRE7,QDR2,FRE4
3_Member	GO:0055080	cation homeostasis	-5.46944	-2.95551	20/157	FET5,SMF3,TIS11,FRE1,CTR3,CCC2,SLF1,AFT1,BTN2,YHC3,FRE2,TRK2,FRE7,MAM3,PDR5,FRE4,PMA2,ARN2,ARN1,SIT1
3_Member	GO:0006875	cellular metal ion homeostasis	-5.37969	-2.95334	16/107	FET5,SMF3,TIS11,FRE1,CTR3,CCC2,SLF1,AFT1,FRE2,TRK2,FRE7,MAM3,FRE4,ARN2,ARN1,SIT1
3_Member	GO:0030003	cellular cation homeostasis	-5.40413	-2.95551	19/145	FET5,SMF3,TIS11,FRE1,CTR3,CCC2,SLF1,AFT1,YHC3,FRE2,TRK2,FRE7,MAM3,PDR5,FRE4,PMA2,ARN2,ARN1,SIT1
3_Member	GO:0050801	ion homeostasis	-5.41799	-2.95551	21/172	FET5,SMF3,TIS11,FRE1,CTR3,GEM1,CCC2,SLF1,AFT1,BTN2,YHC3,FRE2,TRK2,FRE7,MAM3,PDR5,FRE4,PMA2,ARN2,ARN1,SIT1
3_Member	GO:0055072	iron ion homeostasis	-5.58559	-3.0343	12/59	FET5,SMF3,TIS11,FRE1,CCC2,AFT1,FRE2,FRE7,FRE4,ARN2,ARN1,SIT1
3_Member	GO:0055076	transition metal ion homeostasis	-5.68051	-3.09926	15/90	FET5,SMF3,TIS11,FRE1,CTR3,CCC2,SLF1,AFT1,FRE2,FRE7,MAM3,FRE4,ARN2,ARN1,SIT1
3_Member	GO:0019725	cellular homeostasis	-6.01878	-3.30139	26/228	FET5,SMF3,AHP1,TIS11,FRE1,CTR3,DOA4,CCC2,SLF1,PRX1,HUL5,MMS2,AFT1,YHC3,FRE2,TRK2,FRE7,MAM3,PDR5,UBP15,FRE4,PMA2,IRC15,ARN2,ARN1,SIT1
3_Member	GO:0046916	cellular transition metal ion homeostasis	-6.36445	-3.5502	15/80	FET5,SMF3,TIS11,FRE1,CTR3,CCC2,SLF1,AFT1,FRE2,FRE7,MAM3,FRE4,ARN2,ARN1,SIT1
3_Member	GO:0006879	cellular iron ion homeostasis	-6.41165	-3.5502	12/50	FET5,SMF3,TIS11,FRE1,CCC2,AFT1,FRE2,FRE7,FRE4,ARN2,ARN1,SIT1
3_Member	GO:0042592	homeostatic process	-6.91983	-3.80375	35/338	FET5,SMF3,AHP1,TIS11,FRE1,TOP3,CTR3,GEM1,DOA4,CCC2,SLF1,PRX1,BRR6,RAD54,HUL5,MMS2,AFT1,BTN2,YHC3,FRE2,TRK2,FRE7,MAM3,PDR5,HSC82,UBP15,FRE4,PDR18,HSP82,PMA2,IRC15,ARN2,ARN1,SIT1,RAD51
3_Member	GO:0098771	inorganic ion homeostasis	-5.14049	-2.75074	19/151	FET5,SMF3,TIS11,FRE1,CTR3,CCC2,SLF1,AFT1,BTN2,YHC3,FRE2,TRK2,FRE7,MAM3,FRE4,PMA2,ARN2,ARN1,SIT1
4_Summary	GO:0006950	response to stress	-3.80793	-1.64875	52/797	HBN1,POL4,FET5,RIM15,MDJ1,BLM10,SSA2,PSR2,AHP1,MID2,SSA1,LYS20,DUN1,HST4,AHA1,HSP78,DIN7,HSP31,ATG8,SSA3,PRX1,RDH54,RAD16,SMP1,GPX2,RAD54,HUL5,MMS2,AFT1,NQM1,UFD1,ASK10,RAD2,IML2,KAR2,TAH11,LHS1,MPH1,ADD37,HSC82,MCK1,BXI1,ZWF1,SIS1,HSP82,PEP4,CUR1,MIG3,EDC2,GPP2,RAD51,SSA4
4_Member	GO:0006950	response to stress	-3.80793	-1.64875	52/797	HBN1,POL4,FET5,RIM15,MDJ1,BLM10,SSA2,PSR2,AHP1,MID2,SSA1,LYS20,DUN1,HST4,AHA1,HSP78,DIN7,HSP31,ATG8,SSA3,PRX1,RDH54,RAD16,SMP1,GPX2,RAD54,HUL5,MMS2,AFT1,NQM1,UFD1,ASK10,RAD2,IML2,KAR2,TAH11,LHS1,MPH1,ADD37,HSC82,MCK1,BXI1,ZWF1,SIS1,HSP82,PEP4,CUR1,MIG3,EDC2,GPP2,RAD51,SSA4
4_Member	GO:0033554	cellular response to stress	-3.6813	-1.56671	49/745	HBN1,POL4,FET5,RIM15,BLM10,SSA2,PSR2,AHP1,MID2,SSA1,LYS20,DUN1,HST4,AHA1,HSP78,DIN7,HSP31,ATG8,SSA3,PRX1,RDH54,RAD16,SMP1,GPX2,RAD54,HUL5,MMS2,AFT1,NQM1,UFD1,ASK10,RAD2,IML2,KAR2,TAH11,LHS1,MPH1,ADD37,HSC82,MCK1,BXI1,SIS1,HSP82,PEP4,CUR1,MIG3,EDC2,RAD51,SSA4
5_Summary	GO:0015688	iron chelate transport	-3.18471	-1.18973	4/11	FRE4,ARN2,ARN1,SIT1,YIA6
5_Member	GO:0015688	iron chelate transport	-3.18471	-1.18973	4/11	FRE4,ARN2,ARN1,SIT1
5_Member	GO:0015891	siderophore transport	-3.18471	-1.18973	4/11	FRE4,ARN2,ARN1,SIT1
5_Member	GO:0044718	siderophore transmembrane transport	-2.94021	-0.990979	3/6	ARN2,ARN1,SIT1
5_Member	GO:1901678	iron coordination entity transport	-2.51163	-0.635509	4/16	FRE4,ARN2,ARN1,SIT1
5_Member	GO:0051181	cofactor transport	-2.03521	-0.303972	5/33	YIA6,FRE4,ARN2,ARN1,SIT1
6_Summary	GO:0006089	lactate metabolic process	-3.18471	-1.18973	4/11	HSP31,GLO4,CYB2,DLD3,GOR1
6_Member	GO:0006089	lactate metabolic process	-3.18471	-1.18973	4/11	HSP31,GLO4,CYB2,DLD3
6_Member	GO:0046185	aldehyde catabolic process	-2.08827	-0.34766	3/11	HSP31,GLO4,GOR1
7_Summary	GO:0006081	cellular aldehyde metabolic process	-3.02808	-1.0584	8/52	CIT2,IDP2,AAD4,HSP31,NQM1,GLO4,GOR1,ZWF1
7_Member	GO:0006081	cellular aldehyde metabolic process	-3.02808	-1.0584	8/52	CIT2,IDP2,AAD4,HSP31,NQM1,GLO4,GOR1,ZWF1
7_Member	GO:0046487	glyoxylate metabolic process	-2.08827	-0.34766	3/11	CIT2,IDP2,GOR1
8_Summary	GO:0010992	ubiquitin recycling	-3.19101	-1.18973	4/12	DOA4,HUL5,MMS2,UBP15,UBI4,SSA1,UBC11,APC1,YNR068C
8_Member	GO:0010992	ubiquitin recycling	-3.02235	-1.0584	4/12	DOA4,HUL5,MMS2,UBP15
8_Member	GO:0000209	protein polyubiquitination	-3.19101	-1.18973	7/38	UBI4,SSA1,HUL5,MMS2,UBC11,APC1,YNR068C
9_Summary	GO:0030491	heteroduplex formation	-2.51893	-0.635509	3/8	RDH54,RAD54,RAD51
9_Member	GO:0030491	heteroduplex formation	-2.51893	-0.635509	3/8	RDH54,RAD54,RAD51
10_Summary	GO:0035434	copper ion transmembrane transport	-2.51893	-0.635509	3/8	CTR3,CCC2,QDR2
10_Member	GO:0035434	copper ion transmembrane transport	-2.51893	-0.635509	3/8	CTR3,CCC2,QDR2
11_Summary	GO:0061912	selective autophagy	-2.40876	-0.538717	4/17	ATG9,ATG8,ATG40,ATG13
11_Member	GO:0061912	selective autophagy	-2.40876	-0.538717	4/17	ATG9,ATG8,ATG40,ATG13
11_Member	GO:0061709	reticulophagy	-2.21372	-0.400154	3/10	ATG9,ATG8,ATG40
12_Summary	GO:0019953	sexual reproduction	-2.32565	-0.473337	17/213	UBI4,AFB1,ATG26,CRR1,HBT1,DON1,MF(ALPHA)2,KEL2,KAR2,SPR1,STE4,MCK1,SPS18,SPS19,SPO1,SPO24,GPA1,MID2,RIM15,SSA2,SSA1,NQM1,GUT2,TAO3,MPH1,RNY1,MEI4
12_Member	GO:0019953	sexual reproduction	-2.32565	-0.473337	17/213	UBI4,AFB1,ATG26,CRR1,HBT1,DON1,MF(ALPHA)2,KEL2,KAR2,SPR1,STE4,MCK1,SPS18,SPS19,SPO1,SPO24,GPA1
12_Member	GO:0044703	multi-organism reproductive process	-2.32565	-0.473337	17/213	UBI4,AFB1,ATG26,CRR1,HBT1,DON1,MF(ALPHA)2,KEL2,KAR2,SPR1,STE4,MCK1,SPS18,SPS19,SPO1,SPO24,GPA1
12_Member	GO:0051704	multi-organism process	-2.22743	-0.400154	18/236	UBI4,AFB1,ATG26,CRR1,MID2,HBT1,DON1,MF(ALPHA)2,KEL2,KAR2,SPR1,STE4,MCK1,SPS18,SPS19,SPO1,SPO24,GPA1
12_Member	GO:0048869	cellular developmental process	-2.20514	-0.398218	22/312	RIM15,UBI4,SSA2,ATG26,CRR1,MID2,SSA1,HBT1,DON1,NQM1,KEL2,SPR1,GUT2,TAO3,MPH1,MCK1,SPS18,SPS19,SPO1,RNY1,SPO24,MEI4
12_Member	GO:0032502	developmental process	-2.01838	-0.299602	22/324	RIM15,UBI4,SSA2,ATG26,CRR1,MID2,SSA1,HBT1,DON1,NQM1,KEL2,SPR1,GUT2,TAO3,MPH1,MCK1,SPS18,SPS19,SPO1,RNY1,SPO24,MEI4
13_Summary	GO:0031647	regulation of protein stability	-2.31324	-0.472352	4/18	HSP78,HSC82,UBP15,HSP82
13_Member	GO:0031647	regulation of protein stability	-2.31324	-0.472352	4/18	HSP78,HSC82,UBP15,HSP82
14_Summary	GO:0017001	antibiotic catabolic process	-2.31324	-0.472352	4/18	AHP1,PRX1,FDH1,PDH1,AYT1,GPX2,ECM4,PDR5,ZWF1,MIG3
14_Member	GO:0017001	antibiotic catabolic process	-2.31324	-0.472352	4/18	AHP1,PRX1,FDH1,PDH1
14_Member	GO:0009636	response to toxic substance	-2.19697	-0.398218	8/70	AYT1,AHP1,PRX1,GPX2,ECM4,PDR5,ZWF1,MIG3
15_Summary	GO:0015850	organic hydroxy compound transport	-2.71012	-0.782085	7/56	AQY3,YDL199C,ASK10,RCH1,SIP3,PDR18,RGC1
15_Member	GO:0015850	organic hydroxy compound transport	-2.1911	-0.398218	7/56	AQY3,YDL199C,ASK10,RCH1,SIP3,PDR18,RGC1
15_Member	GO:0015791	polyol transport	-2.62291	-0.708445	4/15	AQY3,YDL199C,ASK10,RGC1
15_Member	GO:0015793	glycerol transport	-2.71012	-0.782085	3/7	AQY3,ASK10,RGC1
16_Summary	GO:0008652	cellular amino acid biosynthetic process	-4.92725	-2.59781	12/135	CIT2,GDH3,LYS20,ARG3,MET3,IDH2,CPA1,LYS1,IDH1,YHR033W,UTR4,ARG5,6,SHH4,IDP2,AHP1,PRX1,FDH1,PDH1
16_Member	GO:0008652	cellular amino acid biosynthetic process	-2.13349	-0.365155	12/135	CIT2,GDH3,LYS20,ARG3,MET3,IDH2,CPA1,LYS1,IDH1,YHR033W,UTR4,ARG5,6
16_Member	GO:0072350	tricarboxylic acid metabolic process	-2.1523	-0.379168	5/31	CIT2,SHH4,IDP2,IDH2,IDH1
16_Member	GO:0006099	tricarboxylic acid cycle	-2.21464	-0.400154	5/30	CIT2,SHH4,IDP2,IDH2,IDH1
16_Member	GO:1901607	alpha-amino acid biosynthetic process	-2.34439	-0.480339	12/127	CIT2,GDH3,LYS20,ARG3,MET3,IDH2,CPA1,LYS1,IDH1,YHR033W,UTR4,ARG5,6
16_Member	GO:0006536	glutamate metabolic process	-2.51163	-0.635509	4/16	CIT2,GDH3,IDH2,IDH1
16_Member	GO:0006101	citrate metabolic process	-2.21464	-0.400154	5/30	CIT2,SHH4,IDP2,IDH2,IDH1
16_Member	GO:0016999	antibiotic metabolic process	-2.90511	-0.96306	9/67	CIT2,AHP1,SHH4,IDP2,PRX1,IDH2,FDH1,IDH1,PDH1
16_Member	GO:0006537	glutamate biosynthetic process	-3.18471	-1.18973	4/11	CIT2,GDH3,IDH2,IDH1
16_Member	GO:0006102	isocitrate metabolic process	-3.22826	-1.18973	3/5	IDP2,IDH2,IDH1
16_Member	GO:0009084	glutamine family amino acid biosynthetic process	-4.92725	-2.59781	8/29	CIT2,GDH3,ARG3,IDH2,CPA1,IDH1,YHR033W,ARG5,6
16_Member	GO:0009064	glutamine family amino acid metabolic process	-2.52436	-0.635509	8/62	CIT2,GDH3,ARG3,IDH2,CPA1,IDH1,YHR033W,ARG5,6
17_Summary	GO:0046942	carboxylic acid transport	-5.07249	-2.70684	9/88	ATG22,AGP1,AGP3,VBA2,BTN2,YHC3,YIA6,DIP5,AVT6,FET5,SMF3,CTR3,CCC2,SUL1,HXT8,NCA3,TRK2,YKR104W,PDR5,QDR2,PDR18,PMA2,FRE1,DOA4,AFT1,FRE2,FRE7,FRE4,ARN2,ARN1,SIT1,AQY3,SSA2,SSA1,YDL199C,SSA3,FUR4,YBR241C,YJL163C,KAR2,LHS1,MCH4,ESBP6,MSK1,PEX18,SSA4
17_Member	GO:0046942	carboxylic acid transport	-2.09361	-0.34766	9/88	ATG22,AGP1,AGP3,VBA2,BTN2,YHC3,YIA6,DIP5,AVT6
17_Member	GO:0015849	organic acid transport	-2.03135	-0.303972	9/90	ATG22,AGP1,AGP3,VBA2,BTN2,YHC3,YIA6,DIP5,AVT6
17_Member	GO:0034220	ion transmembrane transport	-2.12342	-0.363084	20/279	ATG22,AGP1,AGP3,FET5,SMF3,CTR3,CCC2,VBA2,SUL1,HXT8,NCA3,TRK2,YKR104W,PDR5,QDR2,YIA6,PDR18,DIP5,PMA2,AVT6
17_Member	GO:0006811	ion transport	-3.63047	-1.53894	31/400	ATG22,AGP1,AGP3,FET5,SMF3,FRE1,CTR3,DOA4,CCC2,VBA2,SUL1,AFT1,BTN2,HXT8,NCA3,YHC3,FRE2,TRK2,YKR104W,FRE7,PDR5,QDR2,YIA6,FRE4,PDR18,DIP5,PMA2,ARN2,ARN1,SIT1,AVT6
17_Member	GO:0006865	amino acid transport	-2.81178	-0.876792	8/56	ATG22,AGP1,AGP3,VBA2,BTN2,YHC3,DIP5,AVT6
17_Member	GO:0003333	amino acid transmembrane transport	-2.17463	-0.39173	6/43	ATG22,AGP1,AGP3,VBA2,DIP5,AVT6
17_Member	GO:0055085	transmembrane transport	-5.07249	-2.70684	38/457	ATG22,AGP1,AGP3,AQY3,FET5,SSA2,SMF3,CTR3,SSA1,YDL199C,CCC2,SSA3,FUR4,YBR241C,VBA2,SUL1,HXT8,YJL163C,NCA3,KAR2,LHS1,TRK2,YKR104W,MCH4,PDR5,QDR2,YIA6,ESBP6,MSK1,PDR18,DIP5,PMA2,ARN2,ARN1,PEX18,SIT1,SSA4,AVT6
18_Summary	GO:0006511	ubiquitin-dependent protein catabolic process	-3.65828	-1.55415	17/227	SSA2,SSA1,DOA4,DON1,VID24,RAD16,HUL5,UFD1,KAR2,UBP11,UBC11,MND2,ADD37,UBP15,APC1,CUZ1,SIS1,MDJ1,BLM10,SSA3,KEX1,ASK10,MCK1,PEP4,ATG15,ECM38,MPO1,DAL1,XYL2,TIS11,HSP31,NTH2,AMS1,GLO4,SPR1,FDH1,GUT2,GOR1,SPS19,SPO1,RNY1,PDH1,EDC2,UBI4,NNK1,IMP1
18_Member	GO:0006511	ubiquitin-dependent protein catabolic process	-2.05366	-0.317508	17/227	SSA2,SSA1,DOA4,DON1,VID24,RAD16,HUL5,UFD1,KAR2,UBP11,UBC11,MND2,ADD37,UBP15,APC1,CUZ1,SIS1
18_Member	GO:0044257	cellular protein catabolic process	-3.65828	-1.55415	24/275	MDJ1,BLM10,SSA2,SSA1,DOA4,DON1,SSA3,VID24,RAD16,KEX1,HUL5,UFD1,ASK10,KAR2,UBP11,UBC11,MND2,ADD37,UBP15,MCK1,APC1,CUZ1,SIS1,PEP4
18_Member	GO:0030163	protein catabolic process	-3.31398	-1.24936	24/290	MDJ1,BLM10,SSA2,SSA1,DOA4,DON1,SSA3,VID24,RAD16,KEX1,HUL5,UFD1,ASK10,KAR2,UBP11,UBC11,MND2,ADD37,UBP15,MCK1,APC1,CUZ1,SIS1,PEP4
18_Member	GO:0051603	proteolysis involved in cellular protein catabolic process	-3.29918	-1.2439	22/256	MDJ1,BLM10,SSA2,SSA1,DOA4,DON1,SSA3,VID24,RAD16,KEX1,HUL5,UFD1,KAR2,UBP11,UBC11,MND2,ADD37,UBP15,APC1,CUZ1,SIS1,PEP4
18_Member	GO:1901565	organonitrogen compound catabolic process	-2.52724	-0.635509	28/407	ATG15,MDJ1,BLM10,SSA2,ECM38,SSA1,DOA4,DON1,SSA3,VID24,RAD16,KEX1,HUL5,MPO1,UFD1,ASK10,KAR2,UBP11,UBC11,MND2,DAL1,ADD37,UBP15,MCK1,APC1,CUZ1,SIS1,PEP4
18_Member	GO:1901575	organic substance catabolic process	-2.12198	-0.363084	43/748	ATG15,MDJ1,BLM10,SSA2,XYL2,TIS11,ECM38,SSA1,DOA4,DON1,HSP31,SSA3,NTH2,VID24,RAD16,KEX1,AMS1,HUL5,MPO1,UFD1,ASK10,KAR2,UBP11,GLO4,SPR1,UBC11,FDH1,GUT2,MND2,DAL1,ADD37,UBP15,MCK1,GOR1,SPS19,APC1,CUZ1,SPO1,SIS1,PEP4,RNY1,PDH1,EDC2
18_Member	GO:0006508	proteolysis	-2.02006	-0.299602	27/423	ATG15,MDJ1,BLM10,UBI4,SSA2,ECM38,SSA1,DOA4,DON1,SSA3,VID24,RAD16,KEX1,HUL5,UFD1,KAR2,NNK1,UBP11,UBC11,MND2,IMP1,ADD37,UBP15,APC1,CUZ1,SIS1,PEP4

## Sheet: (b) NAGs > MPV
Table S8. GO terms significantly overrepresented in the non-additive genes (NAGs) in the F1 hybrids of S. cerevsisiae with expression levels lower (sheet a) and higher (sheet b) than the average expression levels (MPV) of the genes in their parents
Grouping	GO term	Description	Log P	Log (q value)	No. in analyzed list/ No. in reference list	Genes
1_Summary	GO:0002181	cytoplasmic translation	-67.3788	-63.6514	86/202	RPS14A,RPL22B,RPL2A,RPL8B,RPL15A,RPS0B,RPL22A,RPS31,RPS30A,RPL38,RPS25B,RPL26A,RPS29A,RPL31B,RPS1A,RPL35B,RPP1B,RPS16B,RPP1A,RPL31A,RPS29B,RPL4B,RPS11A,RPP2B,RPS17B,RPS18A,RPL27B,RPL37B,RPL32,RPL23A,RPS8A,RPG1,RPL19A,RPL21A,RPS26A,RPL9A,RPL1B,RPL7A,RPL24A,RPS25A,RPL26B,RPL11B,RPS22A,RPL17B,RPS21B,RPS5,RPS4A,RPS27A,RPS21A,RPL25,RPS19A,RPL18A,RPP2A,RPL3,RPS7A,RPS28A,RPL33B,RPS10A,RPL20B,RPS12,RPL40…
1_Member	GO:0002181	cytoplasmic translation	-67.3788	-63.6514	86/202	RPS14A,RPL22B,RPL2A,RPL8B,RPL15A,RPS0B,RPL22A,RPS31,RPS30A,RPL38,RPS25B,RPL26A,RPS29A,RPL31B,RPS1A,RPL35B,RPP1B,RPS16B,RPP1A,RPL31A,RPS29B,RPL4B,RPS11A,RPP2B,RPS17B,RPS18A,RPL27B,RPL37B,RPL32,RPL23A,RPS8A,RPG1,RPL19A,RPL21A,RPS26A,RPL9A,RPL1B,RPL7A,RPL24A,RPS25A,RPL26B,RPL11B,RPS22A,RPL17B,RPS21B,RPS5,RPS4A,RPS27A,RPS21A,RPL25,RPS19A,RPL18A,RPP2A,RPL3,RPS7A,RPS28A,RPL33B,RPS10A,RPL20B,RPS12,RPL40…
1_Member	GO:0043043	peptide biosynthetic process	-21.7942	-18.3678	93/777	RPS14A,RPL22B,RPL2A,RPL8B,RPL15A,RPS0B,RPL22A,RPS31,RPS30A,RPL38,RPS25B,RPL26A,RPS29A,RPL31B,RPS1A,RPL35B,RPP1B,RPS16B,RPP1A,RPL31A,RPS29B,RPL4B,RPS11A,RPP2B,RPS17B,RPS18A,RPL27B,RPL37B,RPL32,RPL23A,RPS8A,RPG1,RPL19A,RPS9B,RPL21A,RPS26A,RPL9A,RPL1B,RPS2,RPL7A,RPL24A,RPS25A,RPL26B,RPL11B,RPS23A,RPS22A,RPL17B,RPS21B,ANB1,RPS5,RPS4A,RPS27A,RPS21A,RPL25,RPS19A,RPL18A,GSH2,RPP2A,RPL3,RPS7A,RPS28A,RPL3…
1_Member	GO:0006412	translation	-21.2917	-18.0414	92/774	RPS14A,RPL22B,RPL2A,RPL8B,RPL15A,RPS0B,RPL22A,RPS31,RPS30A,RPL38,RPS25B,RPL26A,RPS29A,RPL31B,RPS1A,RPL35B,RPP1B,RPS16B,RPP1A,RPL31A,RPS29B,RPL4B,RPS11A,RPP2B,RPS17B,RPS18A,RPL27B,RPL37B,RPL32,RPL23A,RPS8A,RPG1,RPL19A,RPS9B,RPL21A,RPS26A,RPL9A,RPL1B,RPS2,RPL7A,RPL24A,RPS25A,RPL26B,RPL11B,RPS23A,RPS22A,RPL17B,RPS21B,ANB1,RPS5,RPS4A,RPS27A,RPS21A,RPL25,RPS19A,RPL18A,RPP2A,RPL3,RPS7A,RPS28A,RPL33B,RP…
2_Summary	GO:0009070	serine family amino acid biosynthetic process	-4.94134	-2.74544	8/27	SHM2,MET17,CYS3,SER2,MET3,SER1,SER33,SER3,MRI1
2_Member	GO:0009070	serine family amino acid biosynthetic process	-4.94134	-2.74544	8/27	SHM2,MET17,CYS3,SER2,MET3,SER1,SER33,SER3
2_Member	GO:0006564	L-serine biosynthetic process	-4.7909	-2.63172	4/5	SER2,SER1,SER33,SER3
2_Member	GO:0006563	L-serine metabolic process	-4.05766	-2.03785	5/12	SHM2,SER2,SER1,SER33,SER3
2_Member	GO:0009069	serine family amino acid metabolic process	-3.77423	-1.77924	9/48	SHM2,MET17,CYS3,SER2,MET3,SER1,SER33,MRI1,SER3
3_Summary	GO:0071428	rRNA-containing ribonucleoprotein complex export from nucleus	-13.1069	-10.0785	12/64	RPS0B,RPS18A,RPS26A,RPS2,RPS5,RPS19A,RPS28A,RPS10A,RPL40A,RPS10B,RPS3,RPS26B,YRA2,WTM2,THO1,RPS14A,RPS31,LSM3,RPS11A,RPS17B,RPL24A,RPL11B,RPS27A,RPL25,RPL3,RPS17A,RAS2,RPL5,RPL11A,RPS27B,RPL12A,RPG1
3_Member	GO:0071428	rRNA-containing ribonucleoprotein complex export from nucleus	-4.86024	-2.67693	12/64	RPS0B,RPS18A,RPS26A,RPS2,RPS5,RPS19A,RPS28A,RPS10A,RPL40A,RPS10B,RPS3,RPS26B
3_Member	GO:0031503	protein-containing complex localization	-2.37809	-0.614496	15/163	RPS0B,RPS18A,RPS26A,RPS2,RPS5,YRA2,RPS19A,RPS28A,WTM2,RPS10A,RPL40A,RPS10B,RPS3,THO1,RPS26B
3_Member	GO:0051168	nuclear export	-2.76013	-0.941235	14/134	RPS0B,RPS18A,RPS26A,RPS2,RPS5,YRA2,RPS19A,RPS28A,RPS10A,RPL40A,RPS10B,RPS3,THO1,RPS26B
3_Member	GO:0006611	protein export from nucleus	-2.7914	-0.967109	14/133	RPS0B,RPS18A,RPS26A,RPS2,RPS5,YRA2,RPS19A,RPS28A,RPS10A,RPL40A,RPS10B,RPS3,THO1,RPS26B
3_Member	GO:0071166	ribonucleoprotein complex localization	-2.8875	-1.05221	14/130	RPS0B,RPS18A,RPS26A,RPS2,RPS5,YRA2,RPS19A,RPS28A,RPS10A,RPL40A,RPS10B,RPS3,THO1,RPS26B
3_Member	GO:0006405	RNA export from nucleus	-2.92032	-1.07943	14/129	RPS0B,RPS18A,RPS26A,RPS2,RPS5,YRA2,RPS19A,RPS28A,RPS10A,RPL40A,RPS10B,RPS3,THO1,RPS26B
3_Member	GO:0070925	organelle assembly	-6.2788	-3.91315	25/192	RPS14A,RPS0B,RPS31,LSM3,RPS11A,RPS17B,RPS26A,RPL24A,RPL11B,RPS5,RPS27A,RPL25,RPS19A,RPL3,RPS28A,RPS10A,RPL40A,RPS17A,RPS10B,RAS2,RPL5,RPL11A,RPS27B,RPL12A,RPS26B
3_Member	GO:0071426	ribonucleoprotein complex export from nucleus	-2.95354	-1.10698	14/128	RPS0B,RPS18A,RPS26A,RPS2,RPS5,YRA2,RPS19A,RPS28A,RPS10A,RPL40A,RPS10B,RPS3,THO1,RPS26B
3_Member	GO:0097064	ncRNA export from nucleus	-7.04924	-4.55232	11/34	RPS0B,RPS18A,RPS26A,RPS2,RPS5,RPS19A,RPS28A,RPS10A,RPS10B,RPS3,RPS26B
3_Member	GO:0022618	ribonucleoprotein complex assembly	-7.2179	-4.69464	27/197	RPS14A,RPS0B,RPS31,LSM3,RPS11A,RPS17B,RPG1,RPS26A,RPL24A,RPL11B,RPS5,RPS27A,RPL25,RPS19A,RPL3,RPS28A,RPS10A,RPL40A,RPS17A,RPS10B,RAS2,RPL5,RPL11A,RPS27B,RPL12A,THO1,RPS26B
3_Member	GO:0000028	ribosomal small subunit assembly	-10.3307	-7.60335	13/29	RPS14A,RPS0B,RPS31,RPS11A,RPS17B,RPS5,RPS27A,RPS19A,RPS28A,RPS10A,RPS17A,RPS10B,RPS27B
3_Member	GO:0051029	rRNA transport	-10.736	-7.96284	11/18	RPS0B,RPS18A,RPS26A,RPS2,RPS5,RPS19A,RPS28A,RPS10A,RPS10B,RPS3,RPS26B
3_Member	GO:0006407	rRNA export from nucleus	-10.736	-7.96284	11/18	RPS0B,RPS18A,RPS26A,RPS2,RPS5,RPS19A,RPS28A,RPS10A,RPS10B,RPS3,RPS26B
3_Member	GO:0042255	ribosome assembly	-13.1069	-10.0785	23/79	RPS14A,RPS0B,RPS31,RPS11A,RPS17B,RPS26A,RPL24A,RPL11B,RPS5,RPS27A,RPL25,RPS19A,RPL3,RPS28A,RPS10A,RPL40A,RPS17A,RPS10B,RPL5,RPL11A,RPS27B,RPL12A,RPS26B
3_Member	GO:0071826	ribonucleoprotein complex subunit organization	-6.67681	-4.22819	27/209	RPS14A,RPS0B,RPS31,LSM3,RPS11A,RPS17B,RPG1,RPS26A,RPL24A,RPL11B,RPS5,RPS27A,RPL25,RPS19A,RPL3,RPS28A,RPS10A,RPL40A,RPS17A,RPS10B,RAS2,RPL5,RPL11A,RPS27B,RPL12A,THO1,RPS26B
4_Summary	GO:0009112	nucleobase metabolic process	-11.332	-8.4497	8/36	HPT1,ADE8,ADE5,7,ADE3,MTD1,ADE2,SER1,ADE4,ADE13,IMD3,ADE1,ADE6,TYE7,ATP18,ADE17,ADE12,TRX1,GUK1,CAB1,BNA4,DUT1,RPE1,CAB2,ADH3,DCD1,MRI1,OPY1,ERI1,VMA9,HEM13,HEM12
4_Member	GO:0009112	nucleobase metabolic process	-3.95322	-1.94184	8/36	HPT1,ADE8,ADE5,7,ADE3,MTD1,ADE2,SER1,ADE4
4_Member	GO:0009156	ribonucleoside monophosphate biosynthetic process	-3.7245	-1.73749	13/95	ADE13,IMD3,ADE1,HPT1,ADE8,ADE5,7,ADE6,ADE2,TYE7,ATP18,ADE17,ADE4,ADE12
4_Member	GO:0046112	nucleobase biosynthetic process	-3.60341	-1.62422	6/22	ADE8,ADE5,7,ADE3,MTD1,SER1,ADE4
4_Member	GO:0009117	nucleotide metabolic process	-3.53021	-1.57369	24/260	TRX1,ADE13,IMD3,ADE1,HPT1,ADE8,GUK1,CAB1,BNA4,DUT1,ADE5,7,ADE6,ADE3,RPE1,MTD1,ADE2,TYE7,CAB2,ATP18,ADH3,ADE17,ADE4,ADE12,DCD1
4_Member	GO:0006753	nucleoside phosphate metabolic process	-3.38256	-1.43333	24/266	TRX1,ADE13,IMD3,ADE1,HPT1,ADE8,GUK1,CAB1,BNA4,DUT1,ADE5,7,ADE6,ADE3,RPE1,MTD1,ADE2,TYE7,CAB2,ATP18,ADH3,ADE17,ADE4,ADE12,DCD1
4_Member	GO:0055086	nucleobase-containing small molecule metabolic process	-3.30593	-1.36388	26/302	TRX1,ADE13,IMD3,ADE1,HPT1,ADE8,GUK1,CAB1,BNA4,DUT1,ADE5,7,ADE6,ADE3,RPE1,MTD1,ADE2,SER1,TYE7,CAB2,ATP18,ADH3,ADE17,ADE4,ADE12,MRI1,DCD1
4_Member	GO:0009126	purine nucleoside monophosphate metabolic process	-2.98718	-1.12903	14/127	ADE13,IMD3,ADE1,HPT1,ADE8,GUK1,ADE5,7,ADE6,ADE2,TYE7,ATP18,ADE17,ADE4,ADE12
4_Member	GO:0090407	organophosphate biosynthetic process	-2.80663	-0.97688	24/292	TRX1,ADE13,IMD3,ADE1,HPT1,ADE8,GUK1,CAB1,BNA4,OPY1,DUT1,ADE5,7,ADE6,ADE3,MTD1,ADE2,TYE7,CAB2,ATP18,ADE17,ADE4,ADE12,ERI1,DCD1
4_Member	GO:0009150	purine ribonucleotide metabolic process	-2.96489	-1.11257	16/157	ADE13,IMD3,ADE1,HPT1,ADE8,GUK1,CAB1,ADE5,7,ADE6,ADE2,TYE7,CAB2,ATP18,ADE17,ADE4,ADE12
4_Member	GO:0009259	ribonucleotide metabolic process	-2.60253	-0.814668	16/170	ADE13,IMD3,ADE1,HPT1,ADE8,GUK1,CAB1,ADE5,7,ADE6,ADE2,TYE7,CAB2,ATP18,ADE17,ADE4,ADE12
4_Member	GO:0019693	ribose phosphate metabolic process	-2.50033	-0.722346	17/190	ADE13,IMD3,ADE1,HPT1,ADE8,GUK1,CAB1,ADE5,7,ADE6,RPE1,ADE2,TYE7,CAB2,ATP18,ADE17,ADE4,ADE12
4_Member	GO:0009161	ribonucleoside monophosphate metabolic process	-2.49478	-0.721645	14/143	ADE13,IMD3,ADE1,HPT1,ADE8,GUK1,ADE5,7,ADE6,ADE2,TYE7,ATP18,ADE17,ADE4,ADE12
4_Member	GO:1901137	carbohydrate derivative biosynthetic process	-2.32879	-0.569889	21/265	TRX1,ADE13,IMD3,ADE1,HPT1,ADE8,GUK1,CAB1,DUT1,ADE5,7,ADE6,ADE2,TYE7,CAB2,ATP18,ADE17,ADE4,ADE12,ERI1,DCD1,VMA9
4_Member	GO:0006163	purine nucleotide metabolic process	-4.09307	-2.06466	19/166	ADE13,IMD3,ADE1,HPT1,ADE8,GUK1,CAB1,DUT1,ADE5,7,ADE6,ADE3,MTD1,ADE2,TYE7,CAB2,ATP18,ADE17,ADE4,ADE12
4_Member	GO:0009167	purine ribonucleoside monophosphate metabolic process	-2.98718	-1.12903	14/127	ADE13,IMD3,ADE1,HPT1,ADE8,GUK1,ADE5,7,ADE6,ADE2,TYE7,ATP18,ADE17,ADE4,ADE12
4_Member	GO:0072521	purine-containing compound metabolic process	-4.31277	-2.25655	21/188	ADE13,IMD3,ADE1,HPT1,ADE8,GUK1,CAB1,DUT1,ADE5,7,ADE6,ADE3,MTD1,ADE2,SER1,TYE7,CAB2,ATP18,ADE17,ADE4,ADE12,MRI1
4_Member	GO:0009123	nucleoside monophosphate metabolic process	-3.08652	-1.17913	16/153	ADE13,IMD3,ADE1,HPT1,ADE8,GUK1,DUT1,ADE5,7,ADE6,ADE2,TYE7,ATP18,ADE17,ADE4,ADE12,DCD1
4_Member	GO:0009168	purine ribonucleoside monophosphate biosynthetic process	-4.5787	-2.48526	13/79	ADE13,IMD3,ADE1,HPT1,ADE8,ADE5,7,ADE6,ADE2,TYE7,ATP18,ADE17,ADE4,ADE12
4_Member	GO:0042440	pigment metabolic process	-4.56919	-2.48526	8/30	HEM13,HEM12,ADE8,ADE5,7,ADE3,MTD1,SER1,ADE4
4_Member	GO:0046040	IMP metabolic process	-11.332	-8.4497	10/13	ADE13,ADE1,HPT1,ADE8,ADE5,7,ADE6,ADE2,ADE17,ADE4,ADE12
4_Member	GO:0006188	IMP biosynthetic process	-10.064	-7.39096	9/12	ADE13,ADE1,HPT1,ADE8,ADE5,7,ADE6,ADE2,ADE17,ADE4
4_Member	GO:0006189	'de novo' IMP biosynthetic process	-10.0392	-7.39096	8/9	ADE13,ADE1,ADE8,ADE5,7,ADE6,ADE2,ADE17,ADE4
4_Member	GO:0006164	purine nucleotide biosynthetic process	-6.61132	-4.20616	18/102	ADE13,IMD3,ADE1,HPT1,ADE8,GUK1,CAB1,ADE5,7,ADE6,ADE3,MTD1,ADE2,TYE7,CAB2,ATP18,ADE17,ADE4,ADE12
4_Member	GO:0009165	nucleotide biosynthetic process	-6.12951	-3.78235	22/157	TRX1,ADE13,IMD3,ADE1,HPT1,ADE8,GUK1,CAB1,BNA4,DUT1,ADE5,7,ADE6,ADE3,MTD1,ADE2,TYE7,CAB2,ATP18,ADE17,ADE4,ADE12,DCD1
4_Member	GO:1901293	nucleoside phosphate biosynthetic process	-5.98598	-3.65654	22/160	TRX1,ADE13,IMD3,ADE1,HPT1,ADE8,GUK1,CAB1,BNA4,DUT1,ADE5,7,ADE6,ADE3,MTD1,ADE2,TYE7,CAB2,ATP18,ADE17,ADE4,ADE12,DCD1
4_Member	GO:0009152	purine ribonucleotide biosynthetic process	-5.71564	-3.43633	16/94	ADE13,IMD3,ADE1,HPT1,ADE8,GUK1,CAB1,ADE5,7,ADE6,ADE2,TYE7,CAB2,ATP18,ADE17,ADE4,ADE12
4_Member	GO:0072522	purine-containing compound biosynthetic process	-6.86239	-4.39028	19/109	ADE13,IMD3,ADE1,HPT1,ADE8,GUK1,CAB1,ADE5,7,ADE6,ADE3,MTD1,ADE2,SER1,TYE7,CAB2,ATP18,ADE17,ADE4,ADE12
4_Member	GO:0006144	purine nucleobase metabolic process	-5.70132	-3.43633	8/22	HPT1,ADE8,ADE5,7,ADE3,MTD1,ADE2,SER1,ADE4
4_Member	GO:0009113	purine nucleobase biosynthetic process	-5.35231	-3.11629	6/12	ADE8,ADE5,7,ADE3,MTD1,SER1,ADE4
4_Member	GO:0009260	ribonucleotide biosynthetic process	-4.95893	-2.75007	16/107	ADE13,IMD3,ADE1,HPT1,ADE8,GUK1,CAB1,ADE5,7,ADE6,ADE2,TYE7,CAB2,ATP18,ADE17,ADE4,ADE12
4_Member	GO:0009127	purine nucleoside monophosphate biosynthetic process	-4.5787	-2.48526	13/79	ADE13,IMD3,ADE1,HPT1,ADE8,ADE5,7,ADE6,ADE2,TYE7,ATP18,ADE17,ADE4,ADE12
4_Member	GO:0009124	nucleoside monophosphate biosynthetic process	-4.80658	-2.6355	15/98	ADE13,IMD3,ADE1,HPT1,ADE8,DUT1,ADE5,7,ADE6,ADE2,TYE7,ATP18,ADE17,ADE4,ADE12,DCD1
4_Member	GO:0046148	pigment biosynthetic process	-4.68761	-2.54002	8/29	HEM13,HEM12,ADE8,ADE5,7,ADE3,MTD1,SER1,ADE4
4_Member	GO:0046390	ribose phosphate biosynthetic process	-4.6521	-2.51578	16/113	ADE13,IMD3,ADE1,HPT1,ADE8,GUK1,CAB1,ADE5,7,ADE6,ADE2,TYE7,CAB2,ATP18,ADE17,ADE4,ADE12
5_Summary	GO:0000920	septum digestion after cytokinesis	-3.85628	-1.85318	6/20	CTS1,AMN1,EGT2,DSE4,DSE2,DSE1
5_Member	GO:0000920	septum digestion after cytokinesis	-3.85628	-1.85318	6/20	CTS1,AMN1,EGT2,DSE4,DSE2,DSE1
6_Summary	GO:0000027	ribosomal large subunit assembly	-3.53495	-1.57369	8/41	RPL24A,RPL11B,RPL25,RPL3,RPL40A,RPL5,RPL11A,RPL12A
6_Member	GO:0000027	ribosomal large subunit assembly	-3.53495	-1.57369	8/41	RPL24A,RPL11B,RPL25,RPL3,RPL40A,RPL5,RPL11A,RPL12A
7_Summary	GO:0006730	one-carbon metabolic process	-3.11596	-1.19476	5/18	SHM2,SAM1,SAM2,ADE3,MTD1,MRI1
7_Member	GO:0006730	one-carbon metabolic process	-3.11596	-1.19476	5/18	SHM2,SAM1,SAM2,ADE3,MTD1
7_Member	GO:0046500	S-adenosylmethionine metabolic process	-2.12239	-0.412044	3/10	SAM1,SAM2,MRI1
8_Summary	GO:0000470	maturation of LSU-rRNA	-7.49967	-4.94838	9/59	RPL8B,NHP2,RPL35B,RPL37B,RPL1B,RPL7A,RPL17B,TRM112,RPL8A,RPL26A,RPL24A,RPL26B,RPL11B,RPL25,RPL3,RPL33B,RPL40A,RPL33A,RPL5,RPL11A,RPL12A
8_Member	GO:0000470	maturation of LSU-rRNA	-3.07919	-1.17913	9/59	RPL8B,NHP2,RPL35B,RPL37B,RPL1B,RPL7A,RPL17B,TRM112,RPL8A
8_Member	GO:0042273	ribosomal large subunit biogenesis	-7.49967	-4.94838	21/121	RPL8B,RPL26A,NHP2,RPL35B,RPL37B,RPL1B,RPL7A,RPL24A,RPL26B,RPL11B,RPL17B,RPL25,RPL3,RPL33B,RPL40A,TRM112,RPL33A,RPL5,RPL11A,RPL8A,RPL12A
9_Summary	GO:0034660	ncRNA metabolic process	-15.4731	-12.3477	36/512	RPS14A,RPL8B,RPS0B,RPS31,LSM3,RPS1A,NHP2,RPL35B,RPS16B,RPS11A,RPS18A,RPL37B,RPS8A,POP8,HHT1,RPS9B,RPL1B,RPS2,RPL7A,POP6,RPS23A,RPL17B,RPS21B,RPS27A,RPS21A,RPL3,RPS7A,RPS28A,RPB8,TRM112,RPS6A,RPL8A,RPS20,RPS27B,RPS24A,LSM5,RPS17B,RPS5,RPS19A,RPS10A,RPS17A,RPS10B,RPL26A,RPG1,RPS26A,RPL24A,RPL26B,RPL11B,RPL25,RPL33B,RPL40A,RPL34B,RPS3,RAS2,RPL33A,RPL5,RPL11A,RPL12A,THO1,RPS26B
9_Member	GO:0034660	ncRNA metabolic process	-2.70472	-0.896418	36/512	RPS14A,RPL8B,RPS0B,RPS31,LSM3,RPS1A,NHP2,RPL35B,RPS16B,RPS11A,RPS18A,RPL37B,RPS8A,POP8,HHT1,RPS9B,RPL1B,RPS2,RPL7A,POP6,RPS23A,RPL17B,RPS21B,RPS27A,RPS21A,RPL3,RPS7A,RPS28A,RPB8,TRM112,RPS6A,RPL8A,RPS20,RPS27B,RPS24A,LSM5
9_Member	GO:0034470	ncRNA processing	-4.12591	-2.08873	34/398	RPS14A,RPL8B,RPS0B,RPS31,LSM3,RPS1A,NHP2,RPL35B,RPS16B,RPS11A,RPS18A,RPL37B,RPS8A,POP8,RPS9B,RPL1B,RPS2,RPL7A,POP6,RPS23A,RPL17B,RPS21B,RPS27A,RPS21A,RPL3,RPS7A,RPS28A,TRM112,RPS6A,RPL8A,RPS20,RPS27B,RPS24A,LSM5
9_Member	GO:0030490	maturation of SSU-rRNA	-6.3603	-3.97534	19/117	RPS14A,RPS0B,RPS31,RPS1A,RPS16B,RPS11A,RPS18A,RPS8A,RPS9B,RPS23A,RPS21B,RPS27A,RPS21A,RPS28A,TRM112,RPS6A,RPS20,RPS27B,RPS24A
9_Member	GO:0016072	rRNA metabolic process	-6.61847	-4.20616	35/322	RPS14A,RPL8B,RPS0B,RPS31,LSM3,RPS1A,NHP2,RPL35B,RPS16B,RPS11A,RPS18A,RPL37B,RPS8A,POP8,HHT1,RPS9B,RPL1B,RPS2,RPL7A,POP6,RPS23A,RPL17B,RPS21B,RPS27A,RPS21A,RPL3,RPS7A,RPS28A,TRM112,RPS6A,RPL8A,RPS20,RPS27B,RPS24A,LSM5
9_Member	GO:0000462	maturation of SSU-rRNA from tricistronic rRNA transcript (SSU-rRNA, 5.8S rRNA, LSU-rRNA)	-5.06671	-2.84448	16/105	RPS14A,RPS0B,RPS1A,RPS16B,RPS11A,RPS18A,RPS8A,RPS9B,RPS23A,RPS21B,RPS27A,RPS21A,RPS6A,RPS20,RPS27B,RPS24A
9_Member	GO:0042274	ribosomal small subunit biogenesis	-9.50785	-6.89441	26/145	RPS14A,RPS0B,RPS31,RPS1A,RPS16B,RPS11A,RPS17B,RPS18A,RPS8A,RPS9B,RPS23A,RPS21B,RPS5,RPS27A,RPS21A,RPS19A,RPS7A,RPS28A,RPS10A,RPS17A,RPS10B,TRM112,RPS6A,RPS20,RPS27B,RPS24A
9_Member	GO:0022613	ribonucleoprotein complex biogenesis	-12.7356	-9.78635	59/501	RPS14A,RPL8B,RPS0B,RPS31,RPL26A,LSM3,RPS1A,NHP2,RPL35B,RPS16B,RPS11A,RPS17B,RPS18A,RPL37B,RPS8A,POP8,RPG1,RPS9B,RPS26A,RPL1B,RPS2,RPL7A,RPL24A,POP6,RPL26B,RPL11B,RPS23A,RPL17B,RPS21B,RPS5,RPS27A,RPS21A,RPL25,RPS19A,RPL3,RPS7A,RPS28A,RPB8,RPL33B,RPS10A,RPL40A,RPL34B,RPS17A,RPS10B,RPS3,RAS2,TRM112,RPL33A,RPL5,RPS6A,RPL11A,RPL8A,RPS20,RPS27B,RPL12A,THO1,RPS24A,RPS26B,LSM5
9_Member	GO:0042254	ribosome biogenesis	-15.4731	-12.3477	56/398	RPS14A,RPL8B,RPS0B,RPS31,RPL26A,LSM3,RPS1A,NHP2,RPL35B,RPS16B,RPS11A,RPS17B,RPS18A,RPL37B,RPS8A,POP8,RPS9B,RPS26A,RPL1B,RPS2,RPL7A,RPL24A,POP6,RPL26B,RPL11B,RPS23A,RPL17B,RPS21B,RPS5,RPS27A,RPS21A,RPL25,RPS19A,RPL3,RPS7A,RPS28A,RPB8,RPL33B,RPS10A,RPL40A,RPL34B,RPS17A,RPS10B,RPS3,TRM112,RPL33A,RPL5,RPS6A,RPL11A,RPL8A,RPS20,RPS27B,RPL12A,RPS24A,RPS26B,LSM5
9_Member	GO:0006364	rRNA processing	-7.70656	-5.12531	34/278	RPS14A,RPL8B,RPS0B,RPS31,LSM3,RPS1A,NHP2,RPL35B,RPS16B,RPS11A,RPS18A,RPL37B,RPS8A,POP8,RPS9B,RPL1B,RPS2,RPL7A,POP6,RPS23A,RPL17B,RPS21B,RPS27A,RPS21A,RPL3,RPS7A,RPS28A,TRM112,RPS6A,RPL8A,RPS20,RPS27B,RPS24A,LSM5
10_Summary	GO:0006450	regulation of translational fidelity	-2.67608	-0.87298	6/32	RPL31B,RPL31A,RPS9B,RPS2,RPS23A,RPS5
10_Member	GO:0006450	regulation of translational fidelity	-2.67608	-0.87298	6/32	RPL31B,RPL31A,RPS9B,RPS2,RPS23A,RPS5
11_Summary	GO:0009067	aspartate family amino acid biosynthetic process	-5.80313	-3.50029	8/55	THR4,MET17,ADE3,MET3,BAT2,MRI1,BAT1,MET6,SHM2,SAM1,CYS3,VTC5,SAM2,BNA4,LEU1,ADE6,SER2,MAE1,MTD1,IZH2,SER1,TYE7,SER33,MMF1,HIS6,ADH3,SCS7,ADE4,GLN1,ANT1,HIS1,CEM1,ALD5,SER3,GSH2,IMD3,UPC2,HPT1,GUK1,DUT1
11_Member	GO:0009067	aspartate family amino acid biosynthetic process	-2.65568	-0.857725	8/55	THR4,MET17,ADE3,MET3,BAT2,MRI1,BAT1,MET6
11_Member	GO:0009086	methionine biosynthetic process	-2.99652	-1.12903	7/38	MET17,ADE3,MET3,BAT2,MRI1,BAT1,MET6
11_Member	GO:0006082	organic acid metabolic process	-3.02713	-1.15101	34/455	THR4,SHM2,SAM1,MET17,CYS3,VTC5,SAM2,BNA4,LEU1,ADE6,ADE3,SER2,MET3,BAT2,MAE1,MTD1,IZH2,SER1,TYE7,SER33,MMF1,HIS6,ADH3,SCS7,ADE4,GLN1,MRI1,ANT1,BAT1,HIS1,CEM1,ALD5,SER3,MET6
11_Member	GO:0019752	carboxylic acid metabolic process	-3.04579	-1.16351	33/436	THR4,SHM2,SAM1,MET17,CYS3,SAM2,BNA4,LEU1,ADE6,ADE3,SER2,MET3,BAT2,MAE1,MTD1,IZH2,SER1,TYE7,SER33,MMF1,HIS6,ADH3,SCS7,ADE4,GLN1,MRI1,ANT1,BAT1,HIS1,CEM1,ALD5,SER3,MET6
11_Member	GO:0043436	oxoacid metabolic process	-3.06096	-1.17243	34/453	THR4,SHM2,SAM1,MET17,CYS3,VTC5,SAM2,BNA4,LEU1,ADE6,ADE3,SER2,MET3,BAT2,MAE1,MTD1,IZH2,SER1,TYE7,SER33,MMF1,HIS6,ADH3,SCS7,ADE4,GLN1,MRI1,ANT1,BAT1,HIS1,CEM1,ALD5,SER3,MET6
11_Member	GO:0044272	sulfur compound biosynthetic process	-3.29674	-1.36175	11/79	SAM1,MET17,CYS3,SAM2,ADE3,MET3,BAT2,GSH2,MRI1,BAT1,MET6
11_Member	GO:0009066	aspartate family amino acid metabolic process	-3.08302	-1.17913	10/71	THR4,SAM1,MET17,SAM2,ADE3,MET3,BAT2,MRI1,BAT1,MET6
11_Member	GO:0000097	sulfur amino acid biosynthetic process	-3.53495	-1.57369	8/41	MET17,CYS3,ADE3,MET3,BAT2,MRI1,BAT1,MET6
11_Member	GO:0044283	small molecule biosynthetic process	-3.074	-1.17913	31/399	THR4,SHM2,MET17,IMD3,CYS3,UPC2,HPT1,GUK1,BNA4,DUT1,LEU1,ADE3,SER2,MET3,BAT2,MTD1,SER1,TYE7,SER33,MMF1,HIS6,ADH3,SCS7,GLN1,MRI1,BAT1,HIS1,CEM1,ALD5,SER3,MET6
11_Member	GO:0000096	sulfur amino acid metabolic process	-4.31183	-2.25655	10/51	SAM1,MET17,CYS3,SAM2,ADE3,MET3,BAT2,MRI1,BAT1,MET6
11_Member	GO:0006520	cellular amino acid metabolic process	-4.45646	-2.38229	26/257	THR4,SHM2,SAM1,MET17,CYS3,SAM2,BNA4,LEU1,ADE6,ADE3,SER2,MET3,BAT2,MAE1,SER1,SER33,MMF1,HIS6,ADH3,ADE4,GLN1,MRI1,BAT1,HIS1,SER3,MET6
11_Member	GO:0046394	carboxylic acid biosynthetic process	-4.60992	-2.49532	25/237	THR4,SHM2,MET17,CYS3,BNA4,LEU1,ADE3,SER2,MET3,BAT2,MTD1,SER1,TYE7,SER33,MMF1,HIS6,SCS7,GLN1,MRI1,BAT1,HIS1,CEM1,ALD5,SER3,MET6
11_Member	GO:0016053	organic acid biosynthetic process	-4.60992	-2.49532	25/237	THR4,SHM2,MET17,CYS3,BNA4,LEU1,ADE3,SER2,MET3,BAT2,MTD1,SER1,TYE7,SER33,MMF1,HIS6,SCS7,GLN1,MRI1,BAT1,HIS1,CEM1,ALD5,SER3,MET6
11_Member	GO:0008652	cellular amino acid biosynthetic process	-5.38869	-3.13843	19/135	THR4,SHM2,MET17,CYS3,LEU1,ADE3,SER2,MET3,BAT2,SER1,SER33,MMF1,HIS6,GLN1,MRI1,BAT1,HIS1,SER3,MET6
11_Member	GO:1901607	alpha-amino acid biosynthetic process	-5.7963	-3.50029	19/127	THR4,SHM2,MET17,CYS3,LEU1,ADE3,SER2,MET3,BAT2,SER1,SER33,MMF1,HIS6,GLN1,MRI1,BAT1,HIS1,SER3,MET6
11_Member	GO:1901605	alpha-amino acid metabolic process	-5.80313	-3.50029	24/190	THR4,SHM2,SAM1,MET17,CYS3,SAM2,BNA4,LEU1,ADE6,ADE3,SER2,MET3,BAT2,SER1,SER33,MMF1,HIS6,ADE4,GLN1,MRI1,BAT1,HIS1,SER3,MET6
11_Member	GO:0006555	methionine metabolic process	-4.25129	-2.20516	9/42	SAM1,MET17,SAM2,ADE3,MET3,BAT2,MRI1,BAT1,MET6
12_Summary	GO:0006452	translational frameshifting	-2.42555	-0.657215	3/8	ANB1,ASC1,HYP2
12_Member	GO:0006452	translational frameshifting	-2.42555	-0.657215	3/8	ANB1,ASC1,HYP2
13_Summary	GO:0046037	GMP metabolic process	-2.26339	-0.513736	3/9	IMD3,HPT1,GUK1
13_Member	GO:0046037	GMP metabolic process	-2.26339	-0.513736	3/9	IMD3,HPT1,GUK1
13_Member	GO:1901070	guanosine-containing compound biosynthetic process	-2.12239	-0.412044	3/10	IMD3,HPT1,GUK1
14_Summary	GO:0009097	isoleucine biosynthetic process	-2.75463	-0.941063	3/10	BAT2,MMF1,BAT1,MET17,MRI1,LEU1
14_Member	GO:0009097	isoleucine biosynthetic process	-2.12239	-0.412044	3/10	BAT2,MMF1,BAT1
14_Member	GO:0071265	L-methionine biosynthetic process	-2.75463	-0.941063	4/13	MET17,BAT2,MRI1,BAT1
14_Member	GO:0009098	leucine biosynthetic process	-2.61571	-0.822831	3/7	LEU1,BAT2,BAT1
14_Member	GO:0009082	branched-chain amino acid biosynthetic process	-2.50336	-0.722346	4/15	LEU1,BAT2,MMF1,BAT1
14_Member	GO:0019509	L-methionine salvage from methylthioadenosine	-2.26339	-0.513736	3/9	BAT2,MRI1,BAT1
14_Member	GO:0006551	leucine metabolic process	-2.12239	-0.412044	3/10	LEU1,BAT2,BAT1
15_Summary	GO:0000105	histidine biosynthetic process	-2.12239	-0.412044	3/10	ADE3,HIS6,HIS1
15_Member	GO:0000105	histidine biosynthetic process	-2.12239	-0.412044	3/10	ADE3,HIS6,HIS1
15_Member	GO:0006547	histidine metabolic process	-2.12239	-0.412044	3/10	ADE3,HIS6,HIS1
15_Member	GO:0052803	imidazole-containing compound metabolic process	-2.12239	-0.412044	3/10	ADE3,HIS6,HIS1
16_Summary	GO:0009262	deoxyribonucleotide metabolic process	-2.12239	-0.412044	3/10	TRX1,DUT1,DCD1
16_Member	GO:0009262	deoxyribonucleotide metabolic process	-2.12239	-0.412044	3/10	TRX1,DUT1,DCD1
16_Member	GO:0009263	deoxyribonucleotide biosynthetic process	-2.12239	-0.412044	3/10	TRX1,DUT1,DCD1
17_Summary	GO:0000478	endonucleolytic cleavage involved in rRNA processing	-3.13177	-1.20373	7/56	RPS0B,RPS18A,RPL37B,RPL17B,RPS21B,RPS21A,RPS27B
17_Member	GO:0000478	endonucleolytic cleavage involved in rRNA processing	-2.01764	-0.315565	7/56	RPS0B,RPS18A,RPL37B,RPL17B,RPS21B,RPS21A,RPS27B
17_Member	GO:0000479	endonucleolytic cleavage of tricistronic rRNA transcript (SSU-rRNA, 5.8S rRNA, LSU-rRNA)	-2.01764	-0.315565	7/56	RPS0B,RPS18A,RPL37B,RPL17B,RPS21B,RPS21A,RPS27B
17_Member	GO:0000461	endonucleolytic cleavage to generate mature 3'-end of SSU-rRNA from (SSU-rRNA, 5.8S rRNA, LSU-rRNA)	-3.13177	-1.20373	3/5	RPS0B,RPS21B,RPS21A
