# Supplementary material for: Improved redox homeostasis owing to the up-regulation of one-carbon metabolism and related pathways is crucial for yeast heterosis at high temperature
Source: HighWire-hosted journal article supplement (doi:10.1101/gr.262055.120), 2021-03-15
Supplement: Supplemental_Table_S9.xlsx [file Supplemental_Table_S9.xlsx]

## Sheet: Sheet1
Table S9. Reactive oxygen species (ROS) levels in F1 hybrids and their parents growing at 40°C
Group	F1 hybrid	ROS level
		F1 Hybrid	Parent 1	Parent 2
Heterosis	Hy3	1.98681e+07	20698943	3.35047e+07
	Hy35	4.14501e+07	3.28989e+07	2.97593e+07
	Hy58	3.40235e+07	2.00977e+07	4.41879e+07
	Hy183	2.07983e+07	2.43471e+07	3.79631e+07
	Hy198	2.43413e+07	2.33073e+07	3.29937e+07
	Hy205	2.15505e+07	2.46292e+07	3.29076e+07
	Hy301	3.59514e+07	1.76217e+07	2.97593e+07
	Hy360	5.24911e+07	5.92323e+07	5.48756e+07
	Hy361	3.61809e+07	5.92323e+07	2.43471e+07
	Hy363	1.73777e+07	2.46292e+07	4.62986e+07
	Hy365	2.07151e+07	2.00977e+07	2.46292e+07
	Hy375	1.89103e+07	2.33073e+07	3.20245e+07
	Hy377	2.37274e+07	1.92251e+07	3.20245e+07
	Hy378	2.91014e+07	1.92251e+07	2.97593e+07
	Hy385	1.99318e+07	2.33073e+07	20698943
	Hy392	1.94877e+07	2.33073e+07	5.92323e+07
	Hy393	1.91142e+07	1.92251e+07	1.76217e+07
	Hy434	2.70839e+07	2.81697e+07	5.92323e+07
	Hy440	3.00633e+07	2.84654e+07	4.41879e+07
	Hy468	2.67507e+07	6.08976e+07	2.00977e+07
	Hy482	2.8702e+07	5.30443e+07	2.00977e+07
	Hy491	2.72845e+07	3.79631e+07	2.00977e+07
	Hy504	3.78517e+07	3.29076e+07	2.97593e+07
	Hy506	4.07553e+07	2.84654e+07	3.20245e+07
	Hy509	3.75487e+07	2.84654e+07	2.97593e+07
	Hy512	1.90982e+07	2.84654e+07	2.00977e+07
	Hy518	3.65339e+07	4.62986e+07	3.61281e+07
	Hy520	2.7587e+07	3.22143e+07	4.23287e+07
	Hy539	2.421e+07	3.28989e+07	5.48756e+07
	Hy540	2.44761e+07	3.28989e+07	2.43471e+07
	Hy541	2.31357e+07	3.28989e+07	2.33073e+07
	Hy542	2.12047e+07	3.28989e+07	1.92251e+07
	Hy544	32228655	3.22143e+07	2.46292e+07
	Hy554	3.02958e+07	4.23287e+07	5.48756e+07
	Hy555	3.77136e+07	4.23287e+07	2.43471e+07
	Hy557	3.79903e+07	4.23287e+07	1.92251e+07
	Hy577	2.70592e+07	6.08976e+07	4.23287e+07
	Hy578	2.87214e+07	4.23287e+07	3.29937e+07
	Hy579	3.35558e+07	4.23287e+07	5.30443e+07
	Hy580	4.15825e+07	4.23287e+07	3.61281e+07
	Hy581	3.73377e+07	4.23287e+07	3.79631e+07
	Hy598	3.92451e+07	4.23287e+07	4.05767e+07
	Hy599	3.85123e+07	4.23287e+07	6.58537e+07
	Hy613	4.48931e+07	4.23287e+07	2.81697e+07
	Hy614	2.12942e+07	4.23287e+07	2.84654e+07
	Hy639	1.73782e+07	4.23287e+07	1.76217e+07
	Hy657	3.18888e+07	4.23287e+07	2.53103e+07
	Hy676	2.84548e+07	4.23287e+07	4.62986e+07
	Hy678	3.08746e+07	4.23287e+07	20698943
	Hy679	2.89734e+07	4.23287e+07	2.00977e+07
Depression	Hy222	3.35088e+07	3.59532e+07	2.24045e+07
	Hy226	2.43881e+07	3.59532e+07	2.00977e+07
	Hy253	29185286	3.59532e+07	2.18517e+07
	Hy302	5.38786e+07	1.76217e+07	3.59532e+07
	Hy310	3.03885e+07	3.59532e+07	4.41879e+07
	Hy311	3.51889e+07	3.59532e+07	2.90108e+07
	Hy626	5.56099e+07	3.22711e+07	3.59532e+07
	Hy449	4.30387e+07	2.89187e+07	2.24095e+07
	Hy281	3.04808e+07	3.20245e+07	2.28917e+07
